# Supplementary material for: Merkel Cell Polyomavirus Large T Antigen Induces Cellular Senescence for Host Growth Arrest and Viral Genome Persistence through Its Unique Domain
Source: Cells. 2023 Jan 20;12(3):380. doi: 10.3390/cells12030380 (PMC9913222; doi:10.3390/cells12030380)
Supplement: Supplementary file 1 [file cells-12-00380-s001.zip › Supplementary Dataset S1.xlsx]

## Sheet: Enrichment analysis
source	ID	name	p_value	significant	description	term_size	query_size	intersection_size	effective_domain_size	precision	recall	expression pattern	parents
GO:BP	GO:0022613	ribonucleoprotein complex biogenesis	9.20077e-14	TRUE	"A cellular process that results in the biosynthesis of constituent macromolecules, assembly, and arrangement of constituent parts of a complex containing RNA and proteins. Includes the biosynthesis of the constituent RNA and protein molecules, and those macromolecular modifications that are involved in synthesis or assembly of the ribonucleoprotein complex." [GOC:isa_complete, GOC:mah]	473	2379	130	18123	0.0546448	0.274841	Higher in GroupD	['GO:0044085']					GroupB: MCPyV LT
REAC	REAC:R-HSA-73728	RNA Polymerase I Promoter Opening	1.7869e-13	TRUE	RNA Polymerase I Promoter Opening	63	1332	35	10622	0.0262763	0.555556	Higher in GroupB	['REAC:R-HSA-73854']					GroupD: MCPyV LT+p21KD
REAC	REAC:R-HSA-5625886	Activated PKN1 stimulates transcription of AR (androgen receptor) regulated genes KLK2 and KLK3	2.83367e-13	TRUE	Activated PKN1 stimulates transcription of AR (androgen receptor) regulated genes KLK2 and KLK3	67	1332	36	10622	0.027027	0.537313	Higher in GroupB	['REAC:R-HSA-5625740']					Pathways reported in Fig. 5d
REAC	REAC:R-HSA-5334118	DNA methylation	6.63137e-13	TRUE	DNA methylation	65	1332	35	10622	0.0262763	0.538462	Higher in GroupB	['REAC:R-HSA-212165']
REAC	REAC:R-HSA-2299718	Condensation of Prophase Chromosomes	1.34688e-12	TRUE	Condensation of Prophase Chromosomes	73	1332	37	10622	0.0277778	0.506849	Higher in GroupB	['REAC:R-HSA-68875']
GO:BP	GO:0042254	ribosome biogenesis	1.57979e-12	TRUE	"A cellular process that results in the biosynthesis of constituent macromolecules, assembly, and arrangement of constituent parts of ribosome subunits; includes transport to the sites of protein synthesis." [GOC:ma, PMID:26404467, Wikipedia:Ribosome_biogenesis]	335	1976	89	18123	0.0450405	0.265672	Higher in GroupD	['GO:0022613']
REAC	REAC:R-HSA-427359	SIRT1 negatively regulates rRNA expression	4.16501e-12	TRUE	SIRT1 negatively regulates rRNA expression	68	1332	35	10622	0.0262763	0.514706	Higher in GroupB	['REAC:R-HSA-5250941']
REAC	REAC:R-HSA-3214815	HDACs deacetylate histones	7.36957e-12	TRUE	HDACs deacetylate histones	94	1412	43	10622	0.0304533	0.457447	Higher in GroupB	['REAC:R-HSA-3247509']
REAC	REAC:R-HSA-212300	PRC2 methylates histones and DNA	6.61521e-11	TRUE	PRC2 methylates histones and DNA	73	1332	35	10622	0.0262763	0.479452	Higher in GroupB	['REAC:R-HSA-212165']
GO:BP	GO:0006334	nucleosome assembly	1.47168e-10	TRUE	"The aggregation, arrangement and bonding together of a nucleosome, the beadlike structural units of eukaryotic chromatin composed of histones and DNA." [GOC:mah]	142	1332	40	18123	0.03003	0.28169	Higher in GroupB	['GO:0031497', 'GO:0034728', 'GO:0065004']
GO:BP	GO:0006364	rRNA processing	1.94388e-10	TRUE	"Any process involved in the conversion of a primary ribosomal RNA (rRNA) transcript into one or more mature rRNA molecules." [GOC:curators]	265	2331	80	18123	0.03432	0.301887	Higher in GroupD	['GO:0016072', 'GO:0034470', 'GO:0042254']
REAC	REAC:R-HSA-427389	ERCC6 (CSB) and EHMT2 (G9a) positively regulate rRNA expression	2.98343e-10	TRUE	ERCC6 (CSB) and EHMT2 (G9a) positively regulate rRNA expression	76	1332	35	10622	0.0262763	0.460526	Higher in GroupB	['REAC:R-HSA-5250913']
GO:BP	GO:0016072	rRNA metabolic process	5.95385e-10	TRUE	"The chemical reactions and pathways involving rRNA, ribosomal RNA, a structural constituent of ribosomes." [ISBN:0198506732]	275	2331	81	18123	0.034749	0.294545	Higher in GroupD	['GO:0034660']
REAC	REAC:R-HSA-912446	Meiotic recombination	1.01433e-09	TRUE	Meiotic recombination	87	852	30	10622	0.0352113	0.344828	Higher in GroupB	['REAC:R-HSA-1500620']
REAC	REAC:R-HSA-201722	Formation of the beta-catenin:TCF transactivating complex	1.32206e-09	TRUE	Formation of the beta-catenin:TCF transactivating complex	91	1332	38	10622	0.0285285	0.417582	Higher in GroupB	['REAC:R-HSA-201681']
GO:BP	GO:0006335	DNA replication-dependent nucleosome assembly	1.61243e-09	TRUE	"The formation of nucleosomes on newly replicated DNA, coupled to strand elongation." [GOC:mah]	32	1332	18	18123	0.0135135	0.5625	Higher in GroupB	['GO:0006334', 'GO:0034723']
GO:BP	GO:0034723	DNA replication-dependent nucleosome organization	1.61243e-09	TRUE	"The formation or destruction of chromatin structures on newly replicated DNA, coupled to strand elongation." [GOC:mah, PMID:17510629]	32	1332	18	18123	0.0135135	0.5625	Higher in GroupB	['GO:0006333', 'GO:0034728']
REAC	REAC:R-HSA-5625740	RHO GTPases activate PKNs	1.67568e-09	TRUE	RHO GTPases activate PKNs	94	852	31	10622	0.036385	0.329787	Higher in GroupB	['REAC:R-HSA-195258']
REAC	REAC:R-HSA-9616222	Transcriptional regulation of granulopoiesis	1.98605e-09	TRUE	Transcriptional regulation of granulopoiesis	89	852	30	10622	0.0352113	0.337079	Higher in GroupB	['REAC:R-HSA-1266738']
GO:BP	GO:0034470	ncRNA processing	1.99742e-09	TRUE	"Any process that results in the conversion of one or more primary non-coding RNA (ncRNA) transcripts into one or more mature ncRNA molecules." [GOC:mah]	439	1906	97	18123	0.0508919	0.220957	Higher in GroupD	['GO:0006396', 'GO:0034660']
REAC	REAC:R-HSA-2559586	DNA Damage/Telomere Stress Induced Senescence	3.29841e-09	TRUE	DNA Damage/Telomere Stress Induced Senescence	80	1202	33	10622	0.0274542	0.4125	Higher in GroupB	['REAC:R-HSA-2559583']
REAC	REAC:R-HSA-2559582	Senescence-Associated Secretory Phenotype (SASP)	4.71017e-09	TRUE	Senescence-Associated Secretory Phenotype (SASP)	112	1202	40	10622	0.0332779	0.357143	Higher in GroupB	['REAC:R-HSA-2559583']
GO:BP	GO:0097549	chromatin organization involved in negative regulation of transcription	7.06535e-09	TRUE	"Any process that stops, prevents, or reduces the frequency, rate or extent of transcription by chromatin organization." [GOC:di, PMID:23123093]	140	1383	38	18123	0.0274765	0.271429	Higher in GroupB	['GO:0034401', 'GO:0045892']
REAC	REAC:R-HSA-1912408	Pre-NOTCH Transcription and Translation	7.12488e-09	TRUE	Pre-NOTCH Transcription and Translation	93	852	30	10622	0.0352113	0.322581	Higher in GroupB	['REAC:R-HSA-1912422']
GO:BP	GO:0031497	chromatin assembly	7.74971e-09	TRUE	"The assembly of DNA, histone proteins, other associated proteins, and sometimes RNA, into chromatin structure, beginning with the formation of the basic unit, the nucleosome, followed by organization of the nucleosomes into higher order structures, ultimately giving rise to a complex organization of specific domains within the nucleus." [http://www.infobiogen.fr/services/chromcancer/IntroItems/C…	194	1332	45	18123	0.0337838	0.231959	Higher in GroupB	['GO:0006323', 'GO:0006333', 'GO:0022607']
GO:BP	GO:0000183	rDNA heterochromatin assembly	1.11345e-08	TRUE	"The assembly of chromatin characterized by the modified histone H3K9me3, into heterochromatin, resulting in the repression of transcription of rDNA." [PMID:10219245]	39	1332	19	18123	0.0142643	0.487179	Higher in GroupB	['GO:0031507']
GO:BP	GO:0045814	negative regulation of gene expression, epigenetic	5.18085e-08	TRUE	"Any epigenetic process that stops, prevents or reduces the rate of gene expression." [GOC:go_curators]	124	924	28	18123	0.030303	0.225806	Higher in GroupB	['GO:0010629', 'GO:0040029']
REAC	REAC:R-HSA-5250924	B-WICH complex positively regulates rRNA expression	8.99619e-08	TRUE	B-WICH complex positively regulates rRNA expression	90	852	28	10622	0.0328638	0.311111	Higher in GroupB	['REAC:R-HSA-5250913']
REAC	REAC:R-HSA-171306	Packaging Of Telomere Ends	9.7827e-08	TRUE	Packaging Of Telomere Ends	52	1289	25	10622	0.0193949	0.480769	Higher in GroupB	['REAC:R-HSA-157579']
REAC	REAC:R-HSA-73772	RNA Polymerase I Promoter Escape	1.20201e-07	TRUE	RNA Polymerase I Promoter Escape	91	852	28	10622	0.0328638	0.307692	Higher in GroupB	['REAC:R-HSA-73854']
GO:BP	GO:0034728	nucleosome organization	1.34323e-07	TRUE	"A process that is carried out at the cellular level which results in the assembly, arrangement of constituent parts, or disassembly of one or more nucleosomes." [GOC:mah]	188	852	33	18123	0.0387324	0.175532	Higher in GroupB	['GO:0006325', 'GO:0071824']
GO:BP	GO:0060765	regulation of androgen receptor signaling pathway	1.48298e-07	TRUE	"Any process that modulates the rate, frequency, or extent of the androgen receptor signaling pathway." [GOC:dph]	61	1412	23	18123	0.016289	0.377049	Higher in GroupB	['GO:0030521', 'GO:0033143']
GO:BP	GO:0034401	chromatin organization involved in regulation of transcription	1.60501e-07	TRUE	"Any cellular process that results in the specification, formation or maintenance of the physical structure of eukaryotic chromatin that modulates the rate, frequency or extent of DNA-dependent transcription." [GOC:curators, PMID:21102443]	154	1383	38	18123	0.0274765	0.246753	Higher in GroupB	['GO:0006325', 'GO:0006355']
GO:BP	GO:0006333	chromatin assembly or disassembly	1.70697e-07	TRUE	"The formation or destruction of chromatin structures." [GOC:mah]	219	1332	46	18123	0.0345345	0.210046	Higher in GroupB	['GO:0006325']
GO:BP	GO:0006323	DNA packaging	3.64729e-07	TRUE	"Any process in which DNA and associated proteins are formed into a compact, orderly structure." [GOC:mah, ISBN:0815316194]	246	1340	49	18123	0.0365672	0.199187	Higher in GroupB	['GO:0071103']
REAC	REAC:R-HSA-1500620	Meiosis	3.78961e-07	TRUE	Meiosis	117	1202	38	10622	0.031614	0.324786	Higher in GroupB	['REAC:R-HSA-1474165', 'REAC:R-HSA-1640170']
REAC	REAC:R-HSA-110331	Cleavage of the damaged purine	4.39243e-07	TRUE	Cleavage of the damaged purine	55	1289	25	10622	0.0193949	0.454545	Higher in GroupB	['REAC:R-HSA-73927']
REAC	REAC:R-HSA-110330	Recognition and association of DNA glycosylase with site containing an affected purine	4.39243e-07	TRUE	Recognition and association of DNA glycosylase with site containing an affected purine	55	1289	25	10622	0.0193949	0.454545	Higher in GroupB	['REAC:R-HSA-73927']
REAC	REAC:R-HSA-73927	Depurination	4.39243e-07	TRUE	Depurination	55	1289	25	10622	0.0193949	0.454545	Higher in GroupB	['REAC:R-HSA-73929']
REAC	REAC:R-HSA-3214858	RMTs methylate histone arginines	4.83028e-07	TRUE	RMTs methylate histone arginines	79	1383	32	10622	0.0231381	0.405063	Higher in GroupB	['REAC:R-HSA-3247509']
REAC	REAC:R-HSA-9610379	HCMV Late Events	4.9067e-07	TRUE	HCMV Late Events	113	1202	37	10622	0.030782	0.327434	Higher in GroupB	['REAC:R-HSA-9609646']
REAC	REAC:R-HSA-1912422	Pre-NOTCH Expression and Processing	5.65725e-07	TRUE	Pre-NOTCH Expression and Processing	109	852	30	10622	0.0352113	0.275229	Higher in GroupB	['REAC:R-HSA-157118']
REAC	REAC:R-HSA-8936459	RUNX1 regulates genes involved in megakaryocyte differentiation and platelet function	6.20776e-07	TRUE	RUNX1 regulates genes involved in megakaryocyte differentiation and platelet function	97	852	28	10622	0.0328638	0.28866	Higher in GroupB	['REAC:R-HSA-8878171']
REAC	REAC:R-HSA-2559580	Oxidative Stress Induced Senescence	7.47388e-07	TRUE	Oxidative Stress Induced Senescence	123	852	32	10622	0.0375587	0.260163	Higher in GroupB	['REAC:R-HSA-2559583']
GO:BP	GO:0034660	ncRNA metabolic process	2.02815e-06	TRUE	"The chemical reactions and pathways involving non-coding RNA transcripts (ncRNAs)." [GOC:mah]	535	1906	103	18123	0.0540399	0.192523	Higher in GroupD	['GO:0016070']
GO:BP	GO:0031507	heterochromatin assembly	2.15248e-06	TRUE	"The assembly of chromatin into heterochromatin, a compact and highly condensed form that is often, but not always, transcriptionally silent." [GOC:mah]	72	1332	23	18123	0.0172673	0.319444	Higher in GroupB	['GO:0006338', 'GO:0031497', 'GO:0051276', 'GO:0070828', 'GO:0097549']
GO:BP	GO:0097435	supramolecular fiber organization	2.50085e-06	TRUE	"A process that is carried out at the cellular level which results in the assembly, arrangement of constituent parts, or disassembly of a supramolecular fiber, a polymer consisting of an indefinite number of protein or protein complex subunits that have polymerised to form a fiber-shaped structure." [GOC:pr]	863	825	80	18123	0.0969697	0.0926999	Higher in GroupB	['GO:0016043']
REAC	REAC:R-HSA-5578749	Transcriptional regulation by small RNAs	2.76216e-06	TRUE	Transcriptional regulation by small RNAs	103	852	28	10622	0.0328638	0.271845	Higher in GroupB	['REAC:R-HSA-211000']
REAC	REAC:R-HSA-110329	Cleavage of the damaged pyrimidine	4.02995e-06	TRUE	Cleavage of the damaged pyrimidine	60	1289	25	10622	0.0193949	0.416667	Higher in GroupB	['REAC:R-HSA-73928']
REAC	REAC:R-HSA-110328	Recognition and association of DNA glycosylase with site containing an affected pyrimidine	4.02995e-06	TRUE	Recognition and association of DNA glycosylase with site containing an affected pyrimidine	60	1289	25	10622	0.0193949	0.416667	Higher in GroupB	['REAC:R-HSA-73928']
REAC	REAC:R-HSA-73928	Depyrimidination	4.02995e-06	TRUE	Depyrimidination	60	1289	25	10622	0.0193949	0.416667	Higher in GroupB	['REAC:R-HSA-73929']
REAC	REAC:R-HSA-427413	NoRC negatively regulates rRNA expression	4.2757e-06	TRUE	NoRC negatively regulates rRNA expression	106	1202	34	10622	0.0282862	0.320755	Higher in GroupB	['REAC:R-HSA-5250941']
REAC	REAC:R-HSA-5250913	Positive epigenetic regulation of rRNA expression	4.41078e-06	TRUE	Positive epigenetic regulation of rRNA expression	105	852	28	10622	0.0328638	0.266667	Higher in GroupB	['REAC:R-HSA-212165']
GO:BP	GO:0006468	protein phosphorylation	5.76877e-06	TRUE	"The process of introducing a phosphate group on to a protein." [GOC:hb]	1673	334	66	18123	0.197605	0.0394501	Higher in GroupD	['GO:0006464', 'GO:0016310']
REAC	REAC:R-HSA-73929	Base-Excision Repair, AP Site Formation	6.04909e-06	TRUE	Base-Excision Repair, AP Site Formation	61	1289	25	10622	0.0193949	0.409836	Higher in GroupB	['REAC:R-HSA-73884']
GO:BP	GO:0016310	phosphorylation	7.4628e-06	TRUE	"The process of introducing a phosphate group into a molecule, usually with the formation of a phosphoric ester, a phosphoric anhydride or a phosphoric amide." [ISBN:0198506732]	1996	334	74	18123	0.221557	0.0370741	Higher in GroupD	['GO:0006796']
REAC	REAC:R-HSA-68875	Mitotic Prophase	8.86281e-06	TRUE	Mitotic Prophase	135	852	32	10622	0.0375587	0.237037	Higher in GroupB	['REAC:R-HSA-68886']
REAC	REAC:R-HSA-5250941	Negative epigenetic regulation of rRNA expression	9.47027e-06	TRUE	Negative epigenetic regulation of rRNA expression	109	1202	34	10622	0.0282862	0.311927	Higher in GroupB	['REAC:R-HSA-212165']
REAC	REAC:R-HSA-9609690	HCMV Early Events	1.12483e-05	TRUE	HCMV Early Events	135	1423	43	10622	0.0302178	0.318519	Higher in GroupB	['REAC:R-HSA-9609646']
REAC	REAC:R-HSA-5619507	Activation of HOX genes during differentiation	1.1393e-05	TRUE	Activation of HOX genes during differentiation	120	1202	36	10622	0.0299501	0.3	Higher in GroupB	['REAC:R-HSA-1266738']
REAC	REAC:R-HSA-5617472	Activation of anterior HOX genes in hindbrain development during early embryogenesis	1.1393e-05	TRUE	Activation of anterior HOX genes in hindbrain development during early embryogenesis	120	1202	36	10622	0.0299501	0.3	Higher in GroupB	['REAC:R-HSA-5619507']
REAC	REAC:R-HSA-2559583	Cellular Senescence	1.24065e-05	TRUE	Cellular Senescence	195	852	40	10622	0.0469484	0.205128	Higher in GroupB	['REAC:R-HSA-2262752']
REAC	REAC:R-HSA-73854	RNA Polymerase I Promoter Clearance	1.34044e-05	TRUE	RNA Polymerase I Promoter Clearance	110	852	28	10622	0.0328638	0.254545	Higher in GroupB	['REAC:R-HSA-73864']
REAC	REAC:R-HSA-73864	RNA Polymerase I Transcription	1.65836e-05	TRUE	RNA Polymerase I Transcription	111	852	28	10622	0.0328638	0.252252	Higher in GroupB	['REAC:R-HSA-74160']
REAC	REAC:R-HSA-1221632	Meiotic synapsis	1.79301e-05	TRUE	Meiotic synapsis	77	1202	27	10622	0.0224626	0.350649	Higher in GroupB	['REAC:R-HSA-1500620']
GO:BP	GO:0030521	androgen receptor signaling pathway	2.11974e-05	TRUE	"Any series of molecular signals generated as a consequence of an androgen binding to its receptor." [GOC:mah]	76	840	18	18123	0.0214286	0.236842	Higher in GroupB	['GO:0030518']
REAC	REAC:R-HSA-774815	Nucleosome assembly	2.1455e-05	TRUE	Nucleosome assembly	73	1289	27	10622	0.0209465	0.369863	Higher in GroupB	['REAC:R-HSA-73886']
REAC	REAC:R-HSA-606279	Deposition of new CENPA-containing nucleosomes at the centromere	2.1455e-05	TRUE	Deposition of new CENPA-containing nucleosomes at the centromere	73	1289	27	10622	0.0209465	0.369863	Higher in GroupB	['REAC:R-HSA-774815']
GO:BP	GO:0065004	protein-DNA complex assembly	2.25986e-05	TRUE	"The aggregation, arrangement and bonding together of proteins and DNA molecules to form a protein-DNA complex." [GOC:jl]	300	852	39	18123	0.0457746	0.13	Higher in GroupB	['GO:0034622', 'GO:0071824']
GO:BP	GO:0070828	heterochromatin organization	2.7725e-05	TRUE	"Any process that results in the specification, formation or maintenance of the physical structure of eukaryotic heterochromatin, a compact and highly condensed form of chromatin." [GOC:mah]	81	1332	23	18123	0.0172673	0.283951	Higher in GroupB	['GO:0006325']
REAC	REAC:R-HSA-977225	Amyloid fiber formation	4.29863e-05	TRUE	Amyloid fiber formation	109	1408	36	10622	0.0255682	0.330275	Higher in GroupB	['REAC:R-HSA-392499']
REAC	REAC:R-HSA-9670095	Inhibition of DNA recombination at telomere	5.56407e-05	TRUE	Inhibition of DNA recombination at telomere	67	1289	25	10622	0.0193949	0.373134	Higher in GroupB	['REAC:R-HSA-157579']
GO:BP	GO:0006396	RNA processing	5.96432e-05	TRUE	"Any process involved in the conversion of one or more primary RNA transcripts into one or more mature RNA molecules." [GOC:mah]	1010	1999	168	18123	0.084042	0.166337	Higher in GroupD	['GO:0010467', 'GO:0016070']
GO:BP	GO:0030219	megakaryocyte differentiation	8.40238e-05	TRUE	"The process in which a myeloid precursor cell acquires specializes features of a megakaryocyte." [GOC:mah]	101	840	20	18123	0.0238095	0.19802	Higher in GroupB	['GO:0030099']
GO:BP	GO:0071103	DNA conformation change	8.45316e-05	TRUE	"A cellular process that results in a change in the spatial configuration of a DNA molecule. A conformation change can bend DNA, or alter the, twist, writhe, or linking number of a DNA molecule." [GOC:mah]	359	1340	57	18123	0.0425373	0.158774	Higher in GroupB	['GO:0051276']
GO:BP	GO:0032268	regulation of cellular protein metabolic process	0.00010882	TRUE	"Any process that modulates the frequency, rate or extent of the chemical reactions and pathways involving a protein, occurring at the level of an individual cell." [GOC:mah]	2591	391	96	18123	0.245524	0.0370513	Higher in GroupD	['GO:0031323', 'GO:0044267', 'GO:0051246']
REAC	REAC:R-HSA-1474165	Reproduction	0.000118785	TRUE	Reproduction	143	895	32	10622	0.0357542	0.223776	Higher in GroupB	['REAC:0000000']
GO:BP	GO:0038111	interleukin-7-mediated signaling pathway	0.000127091	TRUE	"A series of molecular signals initiated by the binding of interleukin-7 to a receptor on the surface of a cell, and ending with regulation of a downstream cellular process, e.g. transcription." [GOC:nhn, GOC:signaling]	30	840	11	18123	0.0130952	0.366667	Higher in GroupB	['GO:0019221', 'GO:0098761']
GO:BP	GO:0030198	extracellular matrix organization	0.000171151	TRUE	"A process that is carried out at the cellular level which results in the assembly, arrangement of constituent parts, or disassembly of an extracellular matrix." [GOC:mah]	419	205	20	18123	0.097561	0.0477327	Higher in GroupB	['GO:0043062', 'GO:0045229']
GO:BP	GO:0043062	extracellular structure organization	0.000177942	TRUE	"A process that is carried out at the cellular level which results in the assembly, arrangement of constituent parts, or disassembly of structures in the space external to the outermost structure of a cell. For cells without external protective or external encapsulating structures this refers to space outside of the plasma membrane, and also covers the host cell environment outside an intracellul…	420	205	20	18123	0.097561	0.047619	Higher in GroupB	['GO:0016043']
GO:BP	GO:0045229	external encapsulating structure organization	0.000190973	TRUE	"A process that is carried out at the cellular level which results in the assembly, arrangement of constituent parts, or disassembly of external structures that lie outside the plasma membrane and surround the entire cell." [GOC:ai, GOC:dph, GOC:jl, GOC:mah]	422	149	17	18123	0.114094	0.0402844	Higher in GroupB	['GO:0016043']
GO:BP	GO:0042327	positive regulation of phosphorylation	0.000195104	TRUE	"Any process that activates or increases the frequency, rate or extent of addition of phosphate groups to a molecule." [GOC:jl]	928	334	42	18123	0.125749	0.0452586	Higher in GroupD	['GO:0016310', 'GO:0042325', 'GO:0045937']
GO:BP	GO:0032270	positive regulation of cellular protein metabolic process	0.000248341	TRUE	"Any process that activates or increases the frequency, rate or extent of the chemical reactions and pathways involving a protein, occurring at the level of an individual cell." [GOC:mah]	1488	334	57	18123	0.170659	0.0383065	Higher in GroupD	['GO:0031325', 'GO:0032268', 'GO:0044267', 'GO:0051247']
GO:BP	GO:0031401	positive regulation of protein modification process	0.000293052	TRUE	"Any process that activates or increases the frequency, rate or extent of the covalent alteration of one or more amino acid residues within a protein." [GOC:mah, GOC:tb]	1084	334	46	18123	0.137725	0.0424354	Higher in GroupD	['GO:0006464', 'GO:0031399', 'GO:0032270']
GO:BP	GO:0051247	positive regulation of protein metabolic process	0.000320712	TRUE	"Any process that activates or increases the frequency, rate or extent of the chemical reactions and pathways involving a protein." [GOC:ai]	1577	334	59	18123	0.176647	0.0374128	Higher in GroupD	['GO:0010604', 'GO:0019538', 'GO:0051173', 'GO:0051246']
REAC	REAC:R-HSA-3214847	HATs acetylate histones	0.000321896	TRUE	HATs acetylate histones	141	1202	37	10622	0.030782	0.262411	Higher in GroupB	['REAC:R-HSA-3247509']
GO:BP	GO:0000463	maturation of LSU-rRNA from tricistronic rRNA transcript (SSU-rRNA, 5.8S rRNA, LSU-rRNA)	0.00034987	TRUE	"Any process involved in the maturation of a precursor Large SubUnit (LSU) ribosomal RNA (rRNA) molecule into a mature LSU-rRNA molecule from the pre-rRNA molecule originally produced as a tricistronic rRNA transcript that contains the Small Subunit (SSU) rRNA, 5.8S rRNA, and Large Subunit (LSU) in that order from 5' to 3' along the primary transcript." [GOC:curators]	15	2325	11	18123	0.00473118	0.733333	Higher in GroupD	['GO:0000470']
REAC	REAC:R-HSA-3214842	HDMs demethylate histones	0.000409842	TRUE	HDMs demethylate histones	50	840	16	10622	0.0190476	0.32	Higher in GroupB	['REAC:R-HSA-3247509']
GO:BP	GO:0097191	extrinsic apoptotic signaling pathway	0.000436172	TRUE	"A series of molecular signals in which a signal is conveyed from the cell surface to trigger the apoptotic death of a cell. The pathway starts with either a ligand binding to a cell surface receptor, or a ligand being withdrawn from a cell surface receptor (e.g. in the case of signaling by dependence receptors), and ends when the execution phase of apoptosis is triggered." [GOC:mtg_apoptosis, GO…	226	1275	39	18123	0.0305882	0.172566	Higher in GroupD	['GO:0007166', 'GO:0097190']
GO:BP	GO:0051246	regulation of protein metabolic process	0.00047201	TRUE	"Any process that modulates the frequency, rate or extent of the chemical reactions and pathways involving a protein." [GOC:ai]	2759	334	87	18123	0.260479	0.0315332	Higher in GroupD	['GO:0019538', 'GO:0051171', 'GO:0060255', 'GO:0080090']
GO:BP	GO:0040029	regulation of gene expression, epigenetic	0.000485845	TRUE	"Any process that modulates the frequency, rate or extent of gene expression; the process is mitotically or meiotically heritable, or is stably self-propagated in the cytoplasm of a resting cell, and does not entail a change in DNA sequence." [PMID:10521337, PMID:11498582]	205	924	30	18123	0.0324675	0.146341	Higher in GroupB	['GO:0010468']
KEGG	KEGG:05322	Systemic lupus erythematosus	0.00050598	TRUE	Systemic lupus erythematosus	132	924	34	8000	0.0367965	0.257576	Higher in GroupB	['KEGG:00000']
GO:BP	GO:1990000	amyloid fibril formation	0.000512246	TRUE	"The generation of amyloid fibrils, insoluble fibrous protein aggregates exhibiting beta sheet structure, from proteins." [GOC:cvs, GOC:jj, GOC:ppm, GOC:sj, PMID:21148556, PMID:22817896, PMID:28937655, PMID:29654159]	102	840	19	18123	0.022619	0.186275	Higher in GroupB	['GO:0019538', 'GO:0097435']
GO:BP	GO:0045652	regulation of megakaryocyte differentiation	0.000538557	TRUE	"Any process that modulates the frequency, rate or extent of megakaryocyte differentiation." [GOC:go_curators]	83	840	17	18123	0.0202381	0.204819	Higher in GroupB	['GO:0030219', 'GO:0045637']
GO:BP	GO:0006796	phosphate-containing compound metabolic process	0.000539181	TRUE	"The chemical reactions and pathways involving the phosphate group, the anion or salt of any phosphoric acid." [GOC:ai]	2987	334	92	18123	0.275449	0.0308001	Higher in GroupD	['GO:0006793']
REAC	REAC:R-HSA-8939236	RUNX1 regulates transcription of genes involved in differentiation of HSCs	0.000569347	TRUE	RUNX1 regulates transcription of genes involved in differentiation of HSCs	130	852	28	10622	0.0328638	0.215385	Higher in GroupB	['REAC:R-HSA-8878171']
REAC	REAC:R-HSA-9609646	HCMV Infection	0.000677207	TRUE	HCMV Infection	159	1423	44	10622	0.0309206	0.27673	Higher in GroupB	['REAC:R-HSA-5663205']
GO:BP	GO:0006793	phosphorus metabolic process	0.000817322	TRUE	"The chemical reactions and pathways involving the nonmetallic element phosphorus or compounds that contain phosphorus, usually in the form of a phosphate group (PO4)." [GOC:ai]	3014	334	92	18123	0.275449	0.0305242	Higher in GroupD	['GO:0044237']
REAC	REAC:R-HSA-211000	Gene Silencing by RNA	0.000922038	TRUE	Gene Silencing by RNA	133	852	28	10622	0.0328638	0.210526	Higher in GroupB	['REAC:R-HSA-74160']
GO:BP	GO:0071824	protein-DNA complex subunit organization	0.00106394	TRUE	"Any process in which macromolecules aggregate, disaggregate, or are modified, resulting in the formation, disassembly, or alteration of a protein-DNA complex." [GOC:mah]	346	852	39	18123	0.0457746	0.112717	Higher in GroupB	['GO:0043933']
GO:BP	GO:0009896	positive regulation of catabolic process	0.0011531	TRUE	"Any process that activates or increases the frequency, rate or extent of the chemical reactions and pathways resulting in the breakdown of substances." [GOC:go_curators]	530	427	33	18123	0.0772834	0.0622642	Higher in GroupD	['GO:0009056', 'GO:0009893', 'GO:0009894']
GO:BP	GO:0071347	cellular response to interleukin-1	0.00121447	TRUE	"Any process that results in a change in state or activity of a cell (in terms of movement, secretion, enzyme production, gene expression, etc.) as a result of an interleukin-1 stimulus." [GOC:mah]	187	1955	44	18123	0.0225064	0.235294	Higher in GroupD	['GO:0070555', 'GO:0071345']
GO:BP	GO:0031331	positive regulation of cellular catabolic process	0.00150062	TRUE	"Any process that activates or increases the frequency, rate or extent of the chemical reactions and pathways resulting in the breakdown of substances, carried out by individual cells." [GOC:mah]	460	427	30	18123	0.0702576	0.0652174	Higher in GroupD	['GO:0009896', 'GO:0031325', 'GO:0031329', 'GO:0044248']
GO:BP	GO:0033674	positive regulation of kinase activity	0.00152776	TRUE	"Any process that activates or increases the frequency, rate or extent of kinase activity, the catalysis of the transfer of a phosphate group, usually from ATP, to a substrate molecule." [GOC:mah]	610	323	30	18123	0.0928793	0.0491803	Higher in GroupD	['GO:0042327', 'GO:0043549', 'GO:0051347']
GO:BP	GO:0045859	regulation of protein kinase activity	0.00152974	TRUE	"Any process that modulates the frequency, rate or extent of protein kinase activity." [GOC:go_curators]	809	851	70	18123	0.0822562	0.0865266	Higher in GroupD	['GO:0001932', 'GO:0043549']
GO:BP	GO:0045937	positive regulation of phosphate metabolic process	0.00158801	TRUE	"Any process that activates or increases the frequency, rate or extent of the chemical reactions and pathways involving phosphates." [GOC:go_curators]	1003	334	42	18123	0.125749	0.0418744	Higher in GroupD	['GO:0006796', 'GO:0010562', 'GO:0019220']
GO:BP	GO:0010562	positive regulation of phosphorus metabolic process	0.00158801	TRUE	"Any process that increases the frequency, rate or extent of the chemical reactions and pathways involving phosphorus or compounds containing phosphorus." [GOC:dph, GOC:tb]	1003	334	42	18123	0.125749	0.0418744	Higher in GroupD	['GO:0006793', 'GO:0031325', 'GO:0051174']
REAC	REAC:R-HSA-5693571	Nonhomologous End-Joining (NHEJ)	0.00175873	TRUE	Nonhomologous End-Joining (NHEJ)	69	1289	23	10622	0.0178433	0.333333	Higher in GroupB	['REAC:R-HSA-5693532']
GO:BP	GO:0042981	regulation of apoptotic process	0.00177843	TRUE	"Any process that modulates the occurrence or rate of cell death by apoptotic process." [GOC:jl, GOC:mtg_apoptosis]	1560	371	61	18123	0.16442	0.0391026	Higher in GroupD	['GO:0006915', 'GO:0043067']
GO:BP	GO:0043067	regulation of programmed cell death	0.00205273	TRUE	"Any process that modulates the frequency, rate or extent of programmed cell death, cell death resulting from activation of endogenous cellular processes." [GOC:jl]	1603	371	62	18123	0.167116	0.0386775	Higher in GroupD	['GO:0010941', 'GO:0012501']
REAC	REAC:R-HSA-73884	Base Excision Repair	0.00275388	TRUE	Base Excision Repair	89	1311	27	10622	0.020595	0.303371	Higher in GroupB	['REAC:R-HSA-73894']
REAC	REAC:R-HSA-9018519	Estrogen-dependent gene expression	0.00276386	TRUE	Estrogen-dependent gene expression	148	852	29	10622	0.0340376	0.195946	Higher in GroupB	['REAC:R-HSA-8939211']
GO:BP	GO:0001934	positive regulation of protein phosphorylation	0.00286327	TRUE	"Any process that activates or increases the frequency, rate or extent of addition of phosphate groups to amino acids within a protein." [GOC:hjd]	846	334	37	18123	0.110778	0.0437352	Higher in GroupD	['GO:0001932', 'GO:0006468', 'GO:0031401', 'GO:0042327']
GO:BP	GO:0033143	regulation of intracellular steroid hormone receptor signaling pathway	0.00306375	TRUE	"Any process that modulates the frequency, rate or extent of the activity of any intracellular steroid hormone receptor signaling pathway." [GOC:mah]	114	840	19	18123	0.022619	0.166667	Higher in GroupB	['GO:0009966', 'GO:0030518']
GO:BP	GO:0045653	negative regulation of megakaryocyte differentiation	0.00321959	TRUE	"Any process that stops, prevents, or reduces the frequency, rate or extent of megakaryocyte differentiation." [GOC:go_curators]	18	1289	9	18123	0.00698216	0.5	Higher in GroupB	['GO:0030219', 'GO:0045638', 'GO:0045652']
GO:BP	GO:0051338	regulation of transferase activity	0.00341256	TRUE	"Any process that modulates the frequency, rate or extent of transferase activity, the catalysis of the transfer of a group, e.g. a methyl group, glycosyl group, acyl group, phosphorus-containing, or other groups, from one compound (generally regarded as the donor) to another compound (generally regarded as the acceptor). Transferase is the systematic name for any enzyme of EC class 2." [EC:2.-.-…	1036	693	71	18123	0.102453	0.0685328	Higher in GroupD	['GO:0050790']
GO:BP	GO:0106118	regulation of sterol biosynthetic process	0.00349527	TRUE	"Any process that modulates the frequency, rate or extent of a sterol biosynthetic process." [GOC:BHF, GOC:BHF_miRNA, GOC:rph, PMID:16459310]	26	137	5	18123	0.0364964	0.192308	Higher in GroupB	['GO:0016126', 'GO:0050810']
GO:BP	GO:0045540	regulation of cholesterol biosynthetic process	0.00349527	TRUE	"Any process that modulates the frequency, rate or extent of the chemical reactions and pathways resulting in the formation of cholesterol." [GOC:go_curators]	26	137	5	18123	0.0364964	0.192308	Higher in GroupB	['GO:0006695', 'GO:0090181', 'GO:0106118', 'GO:1902930']
GO:BP	GO:0018108	peptidyl-tyrosine phosphorylation	0.00354021	TRUE	"The phosphorylation of peptidyl-tyrosine to form peptidyl-O4'-phospho-L-tyrosine." [RESID:AA0039]	387	198	17	18123	0.0858586	0.0439276	Higher in GroupD	['GO:0006468', 'GO:0018212']
GO:BP	GO:0000470	maturation of LSU-rRNA	0.00367813	TRUE	"Any process involved in the maturation of a precursor Large SubUnit (LSU) ribosomal RNA (rRNA) molecule into a mature LSU-rRNA molecule." [GOC:curators]	29	2494	15	18123	0.00601443	0.517241	Higher in GroupD	['GO:0006364', 'GO:0042273']
GO:BP	GO:0045860	positive regulation of protein kinase activity	0.00380122	TRUE	"Any process that activates or increases the frequency, rate or extent of protein kinase activity." [GOC:go_curators]	537	323	27	18123	0.0835913	0.0502793	Higher in GroupD	['GO:0001934', 'GO:0033674', 'GO:0045859']
GO:BP	GO:0042325	regulation of phosphorylation	0.00383346	TRUE	"Any process that modulates the frequency, rate or extent of addition of phosphate groups into a molecule." [GOC:jl]	1419	334	52	18123	0.155689	0.0366455	Higher in GroupD	['GO:0016310', 'GO:0019220']
REAC	REAC:R-HSA-5693565	Recruitment and ATM-mediated phosphorylation of repair and signaling proteins at DNA double strand breaks	0.00385182	TRUE	Recruitment and ATM-mediated phosphorylation of repair and signaling proteins at DNA double strand breaks	77	852	19	10622	0.0223005	0.246753	Higher in GroupB	['REAC:R-HSA-5693606']
GO:BP	GO:0051128	regulation of cellular component organization	0.00387566	TRUE	"Any process that modulates the frequency, rate or extent of a process involved in the formation, arrangement of constituent parts, or disassembly of cell structures, including the plasma membrane and any external encapsulating structures such as the cell wall and cell envelope." [GOC:ai]	2439	1075	198	18123	0.184186	0.0811808	Higher in GroupB	['GO:0016043', 'GO:0050794']
GO:BP	GO:0018212	peptidyl-tyrosine modification	0.00393384	TRUE	"The modification of peptidyl-tyrosine." [GOC:go_curators]	390	198	17	18123	0.0858586	0.0435897	Higher in GroupD	['GO:0018193']
GO:BP	GO:0002690	positive regulation of leukocyte chemotaxis	0.00404571	TRUE	"Any process that activates or increases the frequency, rate, or extent of leukocyte chemotaxis." [GOC:add]	95	2068	28	18123	0.0135397	0.294737	Higher in GroupD	['GO:0002687', 'GO:0002688', 'GO:0030595', 'GO:0050921']
REAC	REAC:R-HSA-5357956	TNFR1-induced NFkappaB signaling pathway	0.00405877	TRUE	TNFR1-induced NFkappaB signaling pathway	30	2	2	10622	1	0.0666667	Higher in GroupD	['REAC:R-HSA-75893']
GO:BP	GO:0061418	regulation of transcription from RNA polymerase II promoter in response to hypoxia	0.00433596	TRUE	"Any process that modulates the frequency, rate or extent of transcription from an RNA polymerase II promoter as a result of a hypoxia stimulus." [GOC:dph, PMID:12511571]	78	2431	27	18123	0.0111065	0.346154	Higher in GroupD	['GO:0043618', 'GO:0071456']
GO:BP	GO:0002181	cytoplasmic translation	0.00441476	TRUE	"The chemical reactions and pathways resulting in the formation of a protein in the cytoplasm. This is a ribosome-mediated process in which the information in messenger RNA (mRNA) is used to specify the sequence of amino acids in the protein." [GOC:hjd]	149	2262	40	18123	0.0176835	0.268456	Higher in GroupD	['GO:0006412']
GO:BP	GO:0012501	programmed cell death	0.00450193	TRUE	"A process which begins when a cell receives an internal or external signal and activates a series of biochemical events (signaling pathway). The process ends with the death of the cell." [GOC:lr, GOC:mtg_apoptosis]	2158	335	70	18123	0.208955	0.0324374	Higher in GroupD	['GO:0008219']
REAC	REAC:R-HSA-5693606	DNA Double Strand Break Response	0.0047158	TRUE	DNA Double Strand Break Response	78	852	19	10622	0.0223005	0.24359	Higher in GroupB	['REAC:R-HSA-5693532']
REAC	REAC:R-HSA-5357905	Regulation of TNFR1 signaling	0.0049265	TRUE	Regulation of TNFR1 signaling	33	2	2	10622	1	0.0606061	Higher in GroupD	['REAC:R-HSA-75893']
GO:BP	GO:0048251	elastic fiber assembly	0.00496093	TRUE	"Assembly of the extracellular matrix fibers that enables the matrix to recoil after transient stretching." [GOC:jid, PMID:10841810, PMID:12615674]	11	42	3	18123	0.0714286	0.272727	Higher in GroupB	['GO:0085029', 'GO:0097435']
GO:BP	GO:0043549	regulation of kinase activity	0.00515839	TRUE	"Any process that modulates the frequency, rate or extent of kinase activity, the catalysis of the transfer of a phosphate group, usually from ATP, to a substrate molecule." [GOC:bf]	920	774	70	18123	0.0904393	0.076087	Higher in GroupD	['GO:0042325', 'GO:0051338']
GO:BP	GO:0006413	translational initiation	0.00525398	TRUE	"The process preceding formation of the peptide bond between the first two amino acids of a protein. This includes the formation of a complex of the ribosome, mRNA or circRNA, and an initiation complex that contains the first aminoacyl-tRNA." [ISBN:019879276X]	203	2020	46	18123	0.0227723	0.226601	Higher in GroupD	['GO:0006412', 'GO:0044237']
GO:BP	GO:0030097	hemopoiesis	0.00551553	TRUE	"The process whose specific outcome is the progression of the myeloid and lymphoid derived organ/tissue systems of the blood and other parts of the body over time, from formation to the mature structure. The site of hemopoiesis is variable during development, but occurs primarily in bone marrow or kidney in many adult vertebrates." [GOC:dgh, ISBN:0198506732]	946	1481	118	18123	0.0796759	0.124736	Higher in GroupD	['GO:0048534']
GO:BP	GO:0051347	positive regulation of transferase activity	0.00562016	TRUE	"Any process that activates or increases the frequency, rate or extent of transferase activity, the catalysis of the transfer of a group, e.g. a methyl group, glycosyl group, acyl group, phosphorus-containing, or other groups, from a donor compound to an acceptor." [GOC:ai]	690	70	13	18123	0.185714	0.0188406	Higher in GroupD	['GO:0043085', 'GO:0051338']
GO:BP	GO:0009966	regulation of signal transduction	0.00615829	TRUE	"Any process that modulates the frequency, rate or extent of signal transduction." [GOC:sm]	3251	101	38	18123	0.376238	0.0116887	Higher in GroupD	['GO:0007165', 'GO:0010646', 'GO:0023051', 'GO:0048583']
GO:BP	GO:0070555	response to interleukin-1	0.00622871	TRUE	"Any process that results in a change in state or activity of a cell or an organism (in terms of movement, secretion, enzyme production, gene expression, etc.) as a result of an interleukin-1 stimulus." [GOC:BHF, GOC:mah]	217	1955	47	18123	0.0240409	0.21659	Higher in GroupD	['GO:0034097']
GO:BP	GO:0023051	regulation of signaling	0.00627084	TRUE	"Any process that modulates the frequency, rate or extent of a signaling process." [GOC:mtg_signal]	3669	101	41	18123	0.405941	0.0111747	Higher in GroupD	['GO:0023052', 'GO:0050789']
GO:BP	GO:0035556	intracellular signal transduction	0.00641871	TRUE	"The process in which a signal is passed on to downstream components within the cell, which become activated themselves to further propagate the signal and finally trigger a change in the function or state of the cell." [GOC:bf, GOC:jl, GOC:signaling, ISBN:3527303782]	2886	334	86	18123	0.257485	0.029799	Higher in GroupD	['GO:0007165']
REAC	REAC:R-HSA-212165	Epigenetic regulation of gene expression	0.00686037	TRUE	Epigenetic regulation of gene expression	147	1202	35	10622	0.0291181	0.238095	Higher in GroupB	['REAC:R-HSA-74160']
GO:BP	GO:0097190	apoptotic signaling pathway	0.00687577	TRUE	"A series of molecular signals which triggers the apoptotic death of a cell. The pathway starts with reception of a signal, and ends when the execution phase of apoptosis is triggered." [GOC:mtg_apoptosis]	609	1136	68	18123	0.0598592	0.111658	Higher in GroupD	['GO:0006915', 'GO:0007165']
GO:BP	GO:0000165	MAPK cascade	0.00693557	TRUE	"An intracellular protein kinase cascade containing at least a MAPK, a MAPKK and a MAP3K. The cascade can also contain an additional tiers: the upstream MAP4K. The kinases in each tier phosphorylate and activate the kinase in the downstream tier to transmit a signal within a cell." [GOC:bf, GOC:mtg_signaling_feb11, PMID:20811974, PMID:9561267]	965	105	19	18123	0.180952	0.0196891	Higher in GroupD	['GO:0035556']
REAC	REAC:R-HSA-1266695	Interleukin-7 signaling	0.0070083	TRUE	Interleukin-7 signaling	36	850	12	10622	0.0141176	0.333333	Higher in GroupB	['REAC:R-HSA-449147']
GO:BP	GO:0042149	cellular response to glucose starvation	0.00768259	TRUE	"Any process that results in a change in state or activity of a cell (in terms of movement, secretion, enzyme production, gene expression, etc.) as a result of deprivation of glucose." [GOC:jl]	48	459	9	18123	0.0196078	0.1875	Higher in GroupD	['GO:0009267']
GO:BP	GO:0098761	cellular response to interleukin-7	0.00769586	TRUE	"Any process that results in a change in state or activity of a cell (in terms of movement, secretion, enzyme production, gene expression, etc.) as a result of an interleukin-7 stimulus." [GOC:BHF, GOC:mah]	43	840	11	18123	0.0130952	0.255814	Higher in GroupB	['GO:0071345', 'GO:0098760']
GO:BP	GO:0098760	response to interleukin-7	0.00769586	TRUE	"Any process that results in a change in state or activity of a cell or an organism (in terms of movement, secretion, enzyme production, gene expression, etc.) as a result of an interleukin-7 stimulus." [GOC:BHF, GOC:mah]	43	840	11	18123	0.0130952	0.255814	Higher in GroupB	['GO:0034097']
GO:BP	GO:0031325	positive regulation of cellular metabolic process	0.00795581	TRUE	"Any process that activates or increases the frequency, rate or extent of the chemical reactions and pathways by which individual cells transform chemical substances." [GOC:mah]	3342	585	152	18123	0.259829	0.0454817	Higher in GroupD	['GO:0009893', 'GO:0031323', 'GO:0044237', 'GO:0048522']
REAC	REAC:R-HSA-75893	TNF signaling	0.00803356	TRUE	TNF signaling	42	2	2	10622	1	0.047619	Higher in GroupD	['REAC:R-HSA-73887']
GO:BP	GO:0009893	positive regulation of metabolic process	0.009332	TRUE	"Any process that activates or increases the frequency, rate or extent of the chemical reactions and pathways within a cell or an organism." [GOC:go_curators]	3873	585	171	18123	0.292308	0.0441518	Higher in GroupD	['GO:0008152', 'GO:0019222', 'GO:0048518']
GO:BP	GO:0002520	immune system development	0.00946512	TRUE	"The process whose specific outcome is the progression of an organismal system whose objective is to provide calibrated responses by an organism to a potential internal or invasive threat, over time, from its formation to the mature structure. A system is a regularly interacting or interdependent group of organs or tissues that work together to carry out a given biological process." [GOC:add, GOC…	1037	1481	126	18123	0.0850777	0.121504	Higher in GroupD	['GO:0002376', 'GO:0048731']
GO:BP	GO:0042255	ribosome assembly	0.00963595	TRUE	"The aggregation, arrangement and bonding together of the mature ribosome and of its subunits." [GOC:ma]	62	1927	20	18123	0.0103788	0.322581	Higher in GroupD	['GO:0042254', 'GO:0070925']
GO:BP	GO:0036211	protein modification process	0.0103712	TRUE	"The covalent alteration of one or more amino acids occurring in proteins, peptides and nascent polypeptides (co-translational, post-translational modifications). Includes the modification of charged tRNAs that are destined to occur in a protein (pre-translation modification)." [GOC:bf, GOC:jl]	4108	90	40	18123	0.444444	0.0097371	Higher in GroupD	['GO:0019538', 'GO:0043412']
GO:BP	GO:0006464	cellular protein modification process	0.0103712	TRUE	"The covalent alteration of one or more amino acids occurring in proteins, peptides and nascent polypeptides (co-translational, post-translational modifications) occurring at the level of an individual cell. Includes the modification of charged tRNAs that are destined to occur in a protein (pre-translation modification)." [GOC:go_curators]	4108	90	40	18123	0.444444	0.0097371	Higher in GroupD	['GO:0036211', 'GO:0044267']
GO:BP	GO:0031649	heat generation	0.0105597	TRUE	"Any homeostatic process in which an organism produces heat, thereby raising its internal temperature." [GOC:mah]	18	1074	8	18123	0.00744879	0.444444	Higher in GroupD	['GO:0001659']
GO:BP	GO:0030261	chromosome condensation	0.0109108	TRUE	"The progressive compaction of dispersed interphase chromatin into threadlike chromosomes prior to mitotic or meiotic nuclear division, or during apoptosis, in eukaryotic cells." [GOC:mah, ISBN:0815316194]	67	772	13	18123	0.0168394	0.19403	Higher in GroupB	['GO:0006323']
GO:BP	GO:2000058	regulation of ubiquitin-dependent protein catabolic process	0.010919	TRUE	"Any process that modulates the frequency, rate or extent of ubiquitin-dependent protein catabolic process." [GOC:BHF]	166	1126	27	18123	0.0239787	0.162651	Higher in GroupD	['GO:0006511', 'GO:1903050']
GO:BP	GO:0021987	cerebral cortex development	0.0112596	TRUE	"The progression of the cerebral cortex over time from its initial formation until its mature state. The cerebral cortex is the outer layered region of the telencephalon." [GO_REF:0000021, GOC:cls, GOC:dgh, GOC:dph, GOC:jid]	119	962	20	18123	0.02079	0.168067	Higher in GroupB	['GO:0021543', 'GO:0048856']
GO:BP	GO:0090181	regulation of cholesterol metabolic process	0.0113513	TRUE	"Any process that modulates the rate, frequency, or extent of cholesterol metabolism, the chemical reactions and pathways involving cholesterol, cholest-5-en-3 beta-ol, the principal sterol of vertebrates and the precursor of many steroids, including bile acids and steroid hormones." [GOC:BHF, GOC:dph, GOC:tb]	40	197	6	18123	0.0304569	0.15	Higher in GroupB	['GO:0008203', 'GO:0019218', 'GO:0062012']
GO:BP	GO:0031399	regulation of protein modification process	0.0121098	TRUE	"Any process that modulates the frequency, rate or extent of the covalent alteration of one or more amino acid residues within a protein." [GOC:mah, GOC:tb]	1685	855	119	18123	0.139181	0.0706231	Higher in GroupD	['GO:0006464', 'GO:0032268']
GO:BP	GO:0043412	macromolecule modification	0.0121566	TRUE	"The covalent alteration of one or more monomeric units in a polypeptide, polynucleotide, polysaccharide, or other biological macromolecule, resulting in a change in its properties." [GOC:go_curators]	4345	781	241	18123	0.308579	0.0554661	Higher in GroupD	['GO:0043170']
GO:BP	GO:0002688	regulation of leukocyte chemotaxis	0.0122929	TRUE	"Any process that modulates the frequency, rate, or extent of leukocyte chemotaxis." [GOC:add]	122	2068	32	18123	0.0154739	0.262295	Higher in GroupD	['GO:0002685', 'GO:0030595', 'GO:0050920']
REAC	REAC:R-HSA-6783783	Interleukin-10 signaling	0.0127241	TRUE	Interleukin-10 signaling	45	1861	20	10622	0.0107469	0.444444	Higher in GroupD	['REAC:R-HSA-449147']
GO:BP	GO:0043069	negative regulation of programmed cell death	0.0128198	TRUE	"Any process that stops, prevents, or reduces the frequency, rate or extent of programmed cell death, cell death resulting from activation of endogenous cellular processes." [GOC:jl]	952	355	40	18123	0.112676	0.0420168	Higher in GroupD	['GO:0012501', 'GO:0043067', 'GO:0060548']
GO:BP	GO:0022618	ribonucleoprotein complex assembly	0.0133502	TRUE	"The aggregation, arrangement and bonding together of proteins and RNA molecules to form a ribonucleoprotein complex." [GOC:jl]	196	2379	49	18123	0.0205969	0.25	Higher in GroupD	['GO:0022613', 'GO:0034622', 'GO:0071826']
GO:BP	GO:0010646	regulation of cell communication	0.0133876	TRUE	"Any process that modulates the frequency, rate or extent of cell communication. Cell communication is the process that mediates interactions between a cell and its surroundings. Encompasses interactions such as signaling or attachment between one cell and another cell, between a cell and an extracellular matrix, or between a cell and any other aspect of its environment." [GOC:dph, GOC:tb]	3634	101	40	18123	0.39604	0.0110072	Higher in GroupD	['GO:0007154', 'GO:0050794']
GO:BP	GO:2001233	regulation of apoptotic signaling pathway	0.0134392	TRUE	"Any process that modulates the frequency, rate or extent of apoptotic signaling pathway." [GOC:mtg_apoptosis]	365	1136	46	18123	0.040493	0.126027	Higher in GroupD	['GO:0009966', 'GO:0042981', 'GO:0097190']
GO:BP	GO:0048534	hematopoietic or lymphoid organ development	0.0136946	TRUE	"The process whose specific outcome is the progression of any organ involved in hematopoiesis (also known as hemopoiesis) or lymphoid cell activation over time, from its formation to the mature structure. Such development includes differentiation of resident cell types (stromal cells) and of migratory cell types dependent on the unique microenvironment afforded by the organ for their proper diffe…	984	1481	120	18123	0.0810263	0.121951	Higher in GroupD	['GO:0002520', 'GO:0048513']
GO:BP	GO:0001932	regulation of protein phosphorylation	0.0139377	TRUE	"Any process that modulates the frequency, rate or extent of addition of phosphate groups into an amino acid in a protein." [GOC:hjd]	1246	334	46	18123	0.137725	0.0369181	Higher in GroupD	['GO:0006468', 'GO:0031399', 'GO:0042325']
REAC	REAC:R-HSA-3214841	PKMTs methylate histone lysines	0.0147085	TRUE	PKMTs methylate histone lysines	71	840	17	10622	0.0202381	0.239437	Higher in GroupB	['REAC:R-HSA-3247509']
GO:BP	GO:0034508	centromere complex assembly	0.0147889	TRUE	"The aggregation, arrangement and bonding together of proteins and centromeric DNA molecules to form a centromeric protein-DNA complex. Includes the formation of the chromatin structures which form a platform for the kinetochore, and assembly of the kinetochore onto this specialized chromatin. In fission yeast and higher eukaryotes this process also includes the formation of heterochromatin at th…	56	1289	15	18123	0.0116369	0.267857	Higher in GroupB	['GO:0051276', 'GO:0065004']
GO:BP	GO:0009894	regulation of catabolic process	0.0148194	TRUE	"Any process that modulates the frequency, rate, or extent of the chemical reactions and pathways resulting in the breakdown of substances." [GOC:go_curators]	1081	1143	105	18123	0.0918635	0.0971323	Higher in GroupD	['GO:0009056', 'GO:0019222']
GO:BP	GO:0060968	regulation of gene silencing	0.0151116	TRUE	"Any process that modulates the rate, frequency, or extent of gene silencing, the transcriptional or post-transcriptional process carried out at the cellular level that results in long-term gene inactivation." [GOC:dph, GOC:tb]	138	840	20	18123	0.0238095	0.144928	Higher in GroupB	['GO:0010468', 'GO:0016458', 'GO:0050794']
GO:BP	GO:0042273	ribosomal large subunit biogenesis	0.0156199	TRUE	"A cellular process that results in the biosynthesis of constituent macromolecules, assembly, and arrangement of constituent parts of a large ribosomal subunit; includes transport to the sites of protein synthesis." [GOC:jl]	72	2494	25	18123	0.0100241	0.347222	Higher in GroupD	['GO:0022613', 'GO:0042254']
KEGG	KEGG:05222	Small cell lung cancer	0.0163128	TRUE	Small cell lung cancer	92	2	2	8000	1	0.0217391	Higher in GroupD	['KEGG:00000']
GO:BP	GO:0043161	proteasome-mediated ubiquitin-dependent protein catabolic process	0.0165574	TRUE	"The chemical reactions and pathways resulting in the breakdown of a protein or peptide by hydrolysis of its peptide bonds, initiated by the covalent attachment of ubiquitin, and mediated by the proteasome." [GOC:go_curators]	442	1842	75	18123	0.0407166	0.169683	Higher in GroupD	['GO:0006511', 'GO:0010498']
REAC	REAC:R-HSA-195258	RHO GTPase Effectors	0.0166046	TRUE	RHO GTPase Effectors	319	852	47	10622	0.0551643	0.147335	Higher in GroupB	['REAC:R-HSA-194315']
GO:BP	GO:0071826	ribonucleoprotein complex subunit organization	0.0168399	TRUE	"Any process in which macromolecules aggregate, disaggregate, or are modified, resulting in the formation, disassembly, or alteration of a ribonucleoprotein complex." [GOC:mah]	203	2379	50	18123	0.0210172	0.246305	Higher in GroupD	['GO:0043933']
GO:BP	GO:0043066	negative regulation of apoptotic process	0.0169322	TRUE	"Any process that stops, prevents, or reduces the frequency, rate or extent of cell death by apoptotic process." [GOC:jl, GOC:mtg_apoptosis]	928	355	39	18123	0.109859	0.0420259	Higher in GroupD	['GO:0006915', 'GO:0042981', 'GO:0043069']
GO:BP	GO:2001236	regulation of extrinsic apoptotic signaling pathway	0.0173692	TRUE	"Any process that modulates the frequency, rate or extent of extrinsic apoptotic signaling pathway." [GOC:mtg_apoptosis]	159	1136	26	18123	0.0228873	0.163522	Higher in GroupD	['GO:0097191', 'GO:2001233']
GO:BP	GO:0000963	mitochondrial RNA processing	0.017445	TRUE	"The conversion of a primary RNA molecule transcribed from a mitochondrial genome into one or more mature RNA molecules; occurs in the mitochondrion." [GOC:krc, GOC:mah]	18	281	5	18123	0.0177936	0.277778	Higher in GroupD	['GO:0000959', 'GO:0006396', 'GO:0140053']
GO:BP	GO:0009158	ribonucleoside monophosphate catabolic process	0.0184305	TRUE	"The chemical reactions and pathways resulting in the breakdown of a ribonucleoside monophosphate, a compound consisting of a nucleobase linked to a ribose sugar esterified with phosphate on the sugar." [GOC:go_curators, ISBN:0198506732]	12	1981	8	18123	0.00403836	0.666667	Higher in GroupD	['GO:0009125', 'GO:0009161']
GO:BP	GO:0006915	apoptotic process	0.0186501	TRUE	"A programmed cell death process which begins when a cell receives an internal (e.g. DNA damage) or external signal (e.g. an extracellular death ligand), and proceeds through a series of biochemical events (signaling pathway phase) which trigger an execution phase. The execution phase is the last step of an apoptotic process, and is typically characterized by rounding-up of the cell, retraction o…	1998	375	70	18123	0.186667	0.035035	Higher in GroupD	['GO:0012501']
KEGG	KEGG:04064	NF-kappa B signaling pathway	0.0200734	TRUE	NF-kappa B signaling pathway	102	2	2	8000	1	0.0196078	Higher in GroupD	['KEGG:00000']
GO:BP	GO:0036294	cellular response to decreased oxygen levels	0.0203806	TRUE	"Any process that results in a change in state or activity of a cell (in terms of movement, secretion, enzyme production, gene expression, etc.) as a result of a stimulus reflecting a decline in the level of oxygen." [GOC:al]	224	1619	41	18123	0.0253243	0.183036	Higher in GroupD	['GO:0036293', 'GO:0071453']
GO:BP	GO:0033209	tumor necrosis factor-mediated signaling pathway	0.0219995	TRUE	"A series of molecular signals initiated by the binding of a tumor necrosis factor to a receptor on the surface of a cell, and ending with regulation of a downstream cellular process, e.g. transcription." [GOC:mah, GOC:signaling]	179	2669	49	18123	0.0183589	0.273743	Higher in GroupD	['GO:0019221', 'GO:0071356']
GO:BP	GO:0030334	regulation of cell migration	0.0226962	TRUE	"Any process that modulates the frequency, rate or extent of cell migration." [GOC:go_curators]	1008	160	24	18123	0.15	0.0238095	Higher in GroupB	['GO:0016477', 'GO:2000145']
GO:BP	GO:0031329	regulation of cellular catabolic process	0.0227086	TRUE	"Any process that modulates the frequency, rate or extent of the chemical reactions and pathways resulting in the breakdown of substances, carried out by individual cells." [GOC:mah]	913	1126	90	18123	0.079929	0.0985761	Higher in GroupD	['GO:0009894', 'GO:0031323', 'GO:0044248']
GO:BP	GO:0065009	regulation of molecular function	0.0236376	TRUE	"Any process that modulates the frequency, rate or extent of a molecular function, an elemental biological activity occurring at the molecular level, such as catalysis or binding." [GOC:isa_complete]	3191	70	28	18123	0.4	0.00877468	Higher in GroupD	['GO:0065007']
GO:BP	GO:1903050	regulation of proteolysis involved in cellular protein catabolic process	0.0236516	TRUE	"Any process that modulates the frequency, rate or extent of proteolysis involved in cellular protein catabolic process." [GO_REF:0000058, GOC:BHF, GOC:rl, GOC:TermGenie, PMID:18307834]	224	1629	41	18123	0.0251688	0.183036	Higher in GroupD	['GO:0030162', 'GO:0051603', 'GO:1903362']
GO:BP	GO:0018193	peptidyl-amino acid modification	0.0237494	TRUE	"The alteration of an amino acid residue in a peptide." [GOC:mah]	1309	1137	121	18123	0.10642	0.092437	Higher in GroupD	['GO:0006464']
KEGG	KEGG:04668	TNF signaling pathway	0.0242237	TRUE	TNF signaling pathway	112	2	2	8000	1	0.0178571	Higher in GroupD	['KEGG:00000']
GO:BP	GO:0002548	monocyte chemotaxis	0.0251823	TRUE	"The movement of a monocyte in response to an external stimulus." [GOC:add, PMID:11696603, PMID:15173832]	67	704	12	18123	0.0170455	0.179104	Higher in GroupD	['GO:0030595', 'GO:0071674', 'GO:0097529']
REAC	REAC:R-HSA-69473	G2/M DNA damage checkpoint	0.0273346	TRUE	G2/M DNA damage checkpoint	95	852	20	10622	0.0234742	0.210526	Higher in GroupB	['REAC:R-HSA-69481']
GO:BP	GO:0044093	positive regulation of molecular function	0.0282558	TRUE	"Any process that activates or increases the rate or extent of a molecular function, an elemental biological activity occurring at the molecular level, such as catalysis or binding." [GO:jl]	1774	101	25	18123	0.247525	0.0140924	Higher in GroupD	['GO:0065009']
GO:BP	GO:0051174	regulation of phosphorus metabolic process	0.0282965	TRUE	"Any process that modulates the frequency, rate or extent of the chemical reactions and pathways involving phosphorus or compounds containing phosphorus." [GOC:ai]	1640	89	22	18123	0.247191	0.0134146	Higher in GroupD	['GO:0006793', 'GO:0031323']
GO:BP	GO:0019220	regulation of phosphate metabolic process	0.0282965	TRUE	"Any process that modulates the frequency, rate or extent of the chemical reactions and pathways involving phosphates." [GOC:go_curators]	1640	89	22	18123	0.247191	0.0134146	Higher in GroupD	['GO:0006796', 'GO:0051174']
GO:BP	GO:0010941	regulation of cell death	0.0286042	TRUE	"Any process that modulates the rate or frequency of cell death. Cell death is the specific activation or halting of processes within a cell so that its vital functions markedly cease, rather than simply deteriorating gradually over time, which culminates in cell death." [GOC:dph, GOC:tb]	1740	355	60	18123	0.169014	0.0344828	Higher in GroupD	['GO:0008219', 'GO:0050794']
GO:BP	GO:0042976	activation of Janus kinase activity	0.0291172	TRUE	"The process of introducing a phosphate group to a tyrosine residue of a JAK (Janus Activated Kinase) protein, thereby activating it." [GOC:jl, PMID:12479803]	15	53	3	18123	0.0566038	0.2	Higher in GroupD	['GO:0018108', 'GO:0032147', 'GO:0046427']
GO:BP	GO:0071453	cellular response to oxygen levels	0.0298031	TRUE	"Any process that results in a change in state or activity of a cell (in terms of movement, secretion, enzyme production, gene expression, etc.) as a result of a stimulus reflecting the presence, absence, or concentration of oxygen." [GOC:mah]	243	1619	43	18123	0.0265596	0.176955	Higher in GroupD	['GO:0070482', 'GO:0070887']
GO:BP	GO:0007010	cytoskeleton organization	0.0310242	TRUE	"A process that is carried out at the cellular level which results in the assembly, arrangement of constituent parts, or disassembly of cytoskeletal structures." [GOC:dph, GOC:jl, GOC:mah]	1473	977	117	18123	0.119754	0.0794297	Higher in GroupB	['GO:0006996']
GO:BP	GO:0000959	mitochondrial RNA metabolic process	0.0313529	TRUE	"The chemical reactions and pathways involving RNA transcribed from the mitochondrial genome and occurring in the mitochondrion." [GOC:krc, GOC:mah]	49	287	7	18123	0.0243902	0.142857	Higher in GroupD	['GO:0016070']
GO:BP	GO:0051173	positive regulation of nitrogen compound metabolic process	0.0328001	TRUE	"Any process that activates or increases the frequency, rate or extent of the chemical reactions and pathways involving nitrogen or nitrogenous compounds." [GOC:ai, GOC:tb]	3143	334	89	18123	0.266467	0.0283169	Higher in GroupD	['GO:0006807', 'GO:0009893', 'GO:0051171']
GO:BP	GO:0044267	cellular protein metabolic process	0.0329079	TRUE	"The chemical reactions and pathways involving a specific protein, rather than of proteins in general, occurring at the level of an individual cell. Includes cellular protein modification." [GOC:jl]	5280	400	156	18123	0.39	0.0295455	Higher in GroupD	['GO:0019538', 'GO:0044260']
GO:BP	GO:0140053	mitochondrial gene expression	0.0339015	TRUE	"The process in which a mitochondrial gene's sequence is converted into a mature gene product or products (proteins or RNA). This includes the production of an RNA transcript as well as any processing to produce a mature RNA product or an mRNA or circRNA (for protein-coding genes) and the translation of that mRNA or circRNA into protein. Protein maturation is included when required to form an act…	166	1563	32	18123	0.0204734	0.192771	Higher in GroupD	['GO:0010467']
GO:BP	GO:0010803	regulation of tumor necrosis factor-mediated signaling pathway	0.0341022	TRUE	"Any process that modulates the rate or extent of the tumor necrosis factor-mediated signaling pathway. The tumor necrosis factor-mediated signaling pathway is the series of molecular signals generated as a consequence of tumor necrosis factor binding to a cell surface receptor." [GOC:dph, GOC:tb]	64	2	2	18123	1	0.03125	Higher in GroupD	['GO:0001959', 'GO:0033209']
GO:BP	GO:0072359	circulatory system development	0.0344948	TRUE	"The process whose specific outcome is the progression of the circulatory system over time, from its formation to the mature structure. The circulatory system is the organ system that passes nutrients (such as amino acids and electrolytes), gases, hormones, blood cells, etc. to and from cells in the body to help fight diseases and help stabilize body temperature and pH to maintain homeostasis." […	1215	63	15	18123	0.238095	0.0123457	Higher in GroupB	['GO:0048731']
KEGG	KEGG:04210	Apoptosis	0.0357744	TRUE	Apoptosis	136	2	2	8000	1	0.0147059	Higher in GroupD	['KEGG:00000']
GO:BP	GO:0031589	cell-substrate adhesion	0.0367739	TRUE	"The attachment of a cell to the underlying substrate via adhesion molecules." [GOC:mah, GOC:pf]	368	962	40	18123	0.04158	0.108696	Higher in GroupB	['GO:0007155']
GO:BP	GO:0043932	ossification involved in bone remodeling	0.0369784	TRUE	"The formation or growth of bone or of a bony substance, or the conversion of fibrous tissue or of cartilage into bone, involved in response to injury or other physical, physiological or environmental stress stimuli." [GO_REF:0000034, GOC:mtg_mpo]	4	1111	4	18123	0.00360036	1	Higher in GroupB	['GO:0001503', 'GO:0046849']
GO:BP	GO:0043620	regulation of DNA-templated transcription in response to stress	0.0373222	TRUE	"Modulation of the frequency, rate or extent of transcription from a DNA template as a result of a stimulus indicating the organism is under stress. The stress is usually, but not necessarily, exogenous (e.g. temperature, humidity, ionizing radiation)." [GOC:jl, GOC:txnOH]	117	1955	29	18123	0.0148338	0.247863	Higher in GroupD	['GO:0006355', 'GO:0033554']
GO:BP	GO:0030208	dermatan sulfate biosynthetic process	0.0378065	TRUE	"The chemical reactions and pathways resulting in the formation of dermatan sulfate, any glycosaminoglycan with repeats consisting of beta-(1,4)-linked L-iduronyl-beta-(1,3)-N-acetyl-D-galactosamine 4-sulfate units." [GOC:mah, ISBN:0198506732]	12	950	6	18123	0.00631579	0.5	Higher in GroupB	['GO:0006024', 'GO:0030205', 'GO:0044272', 'GO:0050651']
GO:BP	GO:0035337	fatty-acyl-CoA metabolic process	0.0381991	TRUE	"The chemical reactions and pathways involving a fatty-acyl-CoA, any derivative of coenzyme A in which the sulfhydryl group is in thiolester linkage with a fatty-acyl group." [ISBN:0198506732]	42	135	5	18123	0.037037	0.119048	Higher in GroupB	['GO:0006637', 'GO:1901568']
GO:BP	GO:2000060	positive regulation of ubiquitin-dependent protein catabolic process	0.0382185	TRUE	"Any process that activates or increases the frequency, rate or extent of ubiquitin-dependent protein catabolic process." [GOC:BHF]	109	301	10	18123	0.0332226	0.0917431	Higher in GroupD	['GO:0006511', 'GO:1903052', 'GO:2000058']
GO:BP	GO:0085029	extracellular matrix assembly	0.0414231	TRUE	"The aggregation, arrangement and bonding together of the extracellular matrix." [GOC:jl]	47	739	10	18123	0.0135318	0.212766	Higher in GroupB	['GO:0022607', 'GO:0030198']
GO:BP	GO:0008219	cell death	0.0414265	TRUE	"Any biological process that results in permanent cessation of all vital functions of a cell. A cell should be considered dead when any one of the following molecular or morphological criteria is met: (1) the cell has lost the integrity of its plasma membrane; (2) the cell, including its nucleus, has undergone complete fragmentation into discrete bodies (frequently referred to as apoptotic bodies…	2306	101	29	18123	0.287129	0.0125759	Higher in GroupD	['GO:0009987']
GO:BP	GO:0001660	fever generation	0.042357	TRUE	"The heat generation process that results in a rise in body temperature above the normal, often as a response to infection." [GOC:dph, GOC:jl]	11	1074	6	18123	0.00558659	0.545455	Higher in GroupD	['GO:0006953', 'GO:0031649']
GO:BP	GO:0021510	spinal cord development	0.0436295	TRUE	"The process whose specific outcome is the progression of the spinal cord over time, from its formation to the mature structure. The spinal cord primarily conducts sensory and motor nerve impulses between the brain and the peripheral nervous tissues." [GO_REF:0000021, GOC:cls, GOC:dgh, GOC:dph, GOC:jid]	101	1590	23	18123	0.0144654	0.227723	Higher in GroupB	['GO:0007417', 'GO:0048513']
GO:BP	GO:0050790	regulation of catalytic activity	0.0444922	TRUE	"Any process that modulates the activity of an enzyme." [GOC:ai, GOC:ebc, GOC:vw]	2452	333	73	18123	0.219219	0.0297716	Higher in GroupD	['GO:0065009']
GO:BP	GO:1902533	positive regulation of intracellular signal transduction	0.045101	TRUE	"Any process that activates or increases the frequency, rate or extent of intracellular signal transduction." [GOC:BHF, GOC:dph, GOC:signaling, GOC:tb, GOC:TermGenie]	1063	90	17	18123	0.188889	0.0159925	Higher in GroupD	['GO:0009967', 'GO:0035556', 'GO:1902531']
GO:BP	GO:0001558	regulation of cell growth	0.0455994	TRUE	"Any process that modulates the frequency, rate, extent or direction of cell growth." [GOC:go_curators]	426	15	5	18123	0.333333	0.0117371	Higher in GroupB	['GO:0016049', 'GO:0040008', 'GO:0051128']
GO:BP	GO:0045910	negative regulation of DNA recombination	0.0461317	TRUE	"Any process that stops, prevents, or reduces the frequency, rate or extent of DNA recombination." [GOC:go_curators]	76	772	13	18123	0.0168394	0.171053	Higher in GroupB	['GO:0000018', 'GO:0006310', 'GO:0051053']
GO:BP	GO:0038061	NIK/NF-kappaB signaling	0.0485084	TRUE	"The process in which a signal is passed on to downstream components within the cell through the NIK-dependent processing and activation of NF-KappaB. Begins with activation of the NF-KappaB-inducing kinase (NIK), which in turn phosphorylates and activates IkappaB kinase alpha (IKKalpha). IKKalpha phosphorylates the NF-Kappa B2 protein (p100) leading to p100 processing and release of an active NF…	196	2000	42	18123	0.021	0.214286	Higher in GroupD	['GO:0035556']
GO:BP	GO:0010604	positive regulation of macromolecule metabolic process	0.0536069	FALSE	"Any process that increases the frequency, rate or extent of the chemical reactions and pathways involving macromolecules, any molecule of high relative molecular mass, the structure of which essentially comprises the multiple repetition of units derived, actually or conceptually, from molecules of low relative molecular mass." [GOC:dph, GOC:tb]	3568	585	156	18123	0.266667	0.043722	Higher in GroupD	['GO:0009893', 'GO:0043170', 'GO:0060255']
GO:BP	GO:0006695	cholesterol biosynthetic process	0.0588932	FALSE	"The chemical reactions and pathways resulting in the formation of cholesterol, cholest-5-en-3 beta-ol, the principal sterol of vertebrates and the precursor of many steroids, including bile acids and steroid hormones." [GOC:ai]	64	439	9	18123	0.0205011	0.140625	Higher in GroupB	['GO:0008203', 'GO:0016126', 'GO:1902653']
GO:BP	GO:1902653	secondary alcohol biosynthetic process	0.0588932	FALSE	"The chemical reactions and pathways resulting in the formation of secondary alcohol." [GO_REF:0000068, GOC:mengo_curators, GOC:TermGenie, PMID:11288200]	64	439	9	18123	0.0205011	0.140625	Higher in GroupB	['GO:0046165', 'GO:1902652']
GO:BP	GO:0008285	negative regulation of cell population proliferation	0.0601859	FALSE	"Any process that stops, prevents or reduces the rate or extent of cell proliferation." [GOC:go_curators]	804	145	19	18123	0.131034	0.0236318	Higher in GroupB	['GO:0008283', 'GO:0042127', 'GO:0048523']
GO:BP	GO:2000145	regulation of cell motility	0.0606339	FALSE	"Any process that modulates the frequency, rate or extent of cell motility." [GOC:mah]	1070	160	24	18123	0.15	0.0224299	Higher in GroupB	['GO:0040012', 'GO:0048870', 'GO:0051270']
GO:BP	GO:0036293	response to decreased oxygen levels	0.0625838	FALSE	"Any process that results in a change in state or activity of a cell or an organism (in terms of movement, secretion, enzyme production, gene expression, etc.) as a result of a stimulus reflecting a decline in the level of oxygen." [GOC:al]	382	1619	59	18123	0.0364422	0.15445	Higher in GroupD	['GO:0070482']
REAC	REAC:R-HSA-6791226	Major pathway of rRNA processing in the nucleolus and cytosol	0.0642525	FALSE	Major pathway of rRNA processing in the nucleolus and cytosol	183	2331	62	10622	0.026598	0.338798	Higher in GroupD	['REAC:R-HSA-8868773']
REAC	REAC:R-HSA-157118	Signaling by NOTCH	0.0645481	FALSE	Signaling by NOTCH	233	861	36	10622	0.0418118	0.154506	Higher in GroupB	['REAC:R-HSA-162582']
GO:BP	GO:0043632	modification-dependent macromolecule catabolic process	0.0646809	FALSE	"The chemical reactions and pathways resulting in the breakdown of a macromolecule, initiated by covalent modification of the target molecule." [GOC:jl]	681	1842	103	18123	0.0559175	0.151248	Higher in GroupD	['GO:0044265']
GO:BP	GO:1902531	regulation of intracellular signal transduction	0.0654208	FALSE	"Any process that modulates the frequency, rate or extent of intracellular signal transduction." [GOC:dph, GOC:signaling, GOC:tb, GOC:TermGenie]	1883	100	25	18123	0.25	0.0132767	Higher in GroupD	['GO:0009966', 'GO:0035556']
GO:BP	GO:0042274	ribosomal small subunit biogenesis	0.0674131	FALSE	"A cellular process that results in the biosynthesis of constituent macromolecules, assembly, and arrangement of constituent parts of a small ribosomal subunit; includes transport to the sites of protein synthesis." [GOC:jl]	74	1802	20	18123	0.0110988	0.27027	Higher in GroupD	['GO:0022613', 'GO:0042254']
GO:BP	GO:0030316	osteoclast differentiation	0.0676279	FALSE	"The process in which a relatively unspecialized monocyte acquires the specialized features of an osteoclast. An osteoclast is a specialized phagocytic cell associated with the absorption and removal of the mineralized matrix of bone tissue." [CL:0000092, GOC:add, ISBN:0781735149, PMID:12161749]	97	1121	18	18123	0.0160571	0.185567	Higher in GroupD	['GO:0002573']
GO:BP	GO:0009967	positive regulation of signal transduction	0.0677981	FALSE	"Any process that activates or increases the frequency, rate or extent of signal transduction." [GOC:sm]	1626	12	7	18123	0.583333	0.00430504	Higher in GroupD	['GO:0007165', 'GO:0009966', 'GO:0010647', 'GO:0023056', 'GO:0048584']
KEGG	KEGG:05202	Transcriptional misregulation in cancer	0.070711	FALSE	Transcriptional misregulation in cancer	191	2	2	8000	1	0.0104712	Higher in GroupD	['KEGG:00000']
GO:BP	GO:0040012	regulation of locomotion	0.0711252	FALSE	"Any process that modulates the frequency, rate or extent of locomotion of a cell or organism." [GOC:ems]	1113	72	15	18123	0.208333	0.0134771	Higher in GroupD	['GO:0040011', 'GO:0050789']
GO:BP	GO:0070498	interleukin-1-mediated signaling pathway	0.0717614	FALSE	"A series of molecular signals initiated by the binding of interleukin-1 to a receptor on the surface of a cell, and ending with regulation of a downstream cellular process, e.g. transcription." [GOC:BHF, GOC:mah, GOC:signaling]	105	2399	30	18123	0.0125052	0.285714	Higher in GroupD	['GO:0019221', 'GO:0071347']
GO:BP	GO:0060964	regulation of gene silencing by miRNA	0.0721567	FALSE	"Any process that modulates the rate, frequency, or extent of the downregulation of gene expression through the action of microRNAs (miRNAs), endogenous 21-24 nucleotide small RNAs processed from stem-loop RNA precursors (pre-miRNAs). Once incorporated into a RNA-induced silencing complex (RISC), miRNAs can downregulate gene expression by either of two posttranscriptional mechanisms: RNA (often m…	117	840	17	18123	0.0202381	0.145299	Higher in GroupB	['GO:0035195', 'GO:0060147', 'GO:0060966']
GO:BP	GO:0030199	collagen fibril organization	0.0730107	FALSE	"Any process that determines the size and arrangement of collagen fibrils within an extracellular matrix." [GOC:mah, ISBN:0815316194]	109	59	5	18123	0.0847458	0.0458716	Higher in GroupB	['GO:0030198', 'GO:0097435']
GO:BP	GO:0014910	regulation of smooth muscle cell migration	0.0758879	FALSE	"Any process that modulates the frequency, rate or extent of smooth muscle cell migration." [CL:0000192, GOC:mtg_muscle]	90	244	8	18123	0.0327869	0.0888889	Higher in GroupB	['GO:0014909', 'GO:0030334']
GO:BP	GO:0006511	ubiquitin-dependent protein catabolic process	0.0763746	FALSE	"The chemical reactions and pathways resulting in the breakdown of a protein or peptide by hydrolysis of its peptide bonds, initiated by the covalent attachment of a ubiquitin group, or multiple ubiquitin groups, to the protein." [GOC:go_curators]	663	1143	69	18123	0.0603675	0.104072	Higher in GroupD	['GO:0019941']
GO:BP	GO:0071496	cellular response to external stimulus	0.0811238	FALSE	"Any process that results in a change in state or activity of a cell (in terms of movement, secretion, enzyme production, gene expression, etc.) as a result of an external stimulus." [GOC:mah]	353	785	33	18123	0.0420382	0.0934844	Higher in GroupD	['GO:0009605']
GO:BP	GO:0009888	tissue development	0.0811297	FALSE	"The process whose specific outcome is the progression of a tissue over time, from its formation to the mature structure." [ISBN:0471245208]	2093	81	23	18123	0.283951	0.010989	Higher in GroupD	['GO:0048856']
GO:BP	GO:1901568	fatty acid derivative metabolic process	0.0825585	FALSE	"The chemical reactions and pathways involving fatty acid derivative." [GOC:pr, GOC:TermGenie]	81	135	6	18123	0.0444444	0.0740741	Higher in GroupB	['GO:0071704']
GO:BP	GO:0045669	positive regulation of osteoblast differentiation	0.0851426	FALSE	"Any process that activates or increases the frequency, rate or extent of osteoblast differentiation." [GOC:go_curators]	70	419	9	18123	0.0214797	0.128571	Higher in GroupB	['GO:0001649', 'GO:0045597', 'GO:0045667']
GO:BP	GO:1900051	positive regulation of histone exchange	0.0857367	FALSE	"Any process that activates or increases the frequency, rate or extent of histone exchange." [GOC:TermGenie, PMID:20332092]	25	1289	9	18123	0.00698216	0.36	Higher in GroupB	['GO:0043486', 'GO:1900049', 'GO:1905269']
GO:BP	GO:0045007	depurination	0.0857367	FALSE	"The disruption of the bond between the sugar in the backbone and the A or G base, causing the base to be removed and leaving a depurinated sugar." [GOC:ai]	25	1289	9	18123	0.00698216	0.36	Higher in GroupB	['GO:0006285', 'GO:0006304']
GO:BP	GO:1900049	regulation of histone exchange	0.0857367	FALSE	"Any process that modulates the frequency, rate or extent of histone exchange." [GOC:TermGenie, PMID:20332092]	25	1289	9	18123	0.00698216	0.36	Higher in GroupB	['GO:0043486', 'GO:1902275']
GO:BP	GO:0006414	translational elongation	0.0863523	FALSE	"The successive addition of amino acid residues to a nascent polypeptide chain during protein biosynthesis." [GOC:ems]	143	1563	28	18123	0.0179143	0.195804	Higher in GroupD	['GO:0006412', 'GO:0034645']
GO:BP	GO:0071456	cellular response to hypoxia	0.0875589	FALSE	"Any process that results in a change in state or activity of a cell (in terms of movement, secretion, enzyme production, gene expression, etc.) as a result of a stimulus indicating lowered oxygen tension. Hypoxia, defined as a decline in O2 levels below normoxic levels of 20.8 - 20.95%, results in metabolic adaptation at both the cellular and organismal level." [GOC:mah]	214	1619	38	18123	0.0234713	0.17757	Higher in GroupD	['GO:0001666', 'GO:0033554', 'GO:0036294']
GO:BP	GO:0060147	regulation of posttranscriptional gene silencing	0.0901903	FALSE	"Any process that modulates the frequency, rate or extent of the inactivation of gene expression by a posttranscriptional mechanism." [GOC:dph]	119	840	17	18123	0.0202381	0.142857	Higher in GroupB	['GO:0016441', 'GO:0060968']
KEGG	KEGG:04613	Neutrophil extracellular trap formation	0.0902555	FALSE	Neutrophil extracellular trap formation	189	885	36	8000	0.040678	0.190476	Higher in GroupB	['KEGG:00000']
REAC	REAC:R-HSA-73887	Death Receptor Signalling	0.0907857	FALSE	Death Receptor Signalling	140	2	2	10622	1	0.0142857	Higher in GroupD	['REAC:R-HSA-162582']
GO:BP	GO:0008630	intrinsic apoptotic signaling pathway in response to DNA damage	0.0908367	FALSE	"A series of molecular signals in which an intracellular signal is conveyed to trigger the apoptotic death of a cell. The pathway is induced by the detection of DNA damage, and ends when the execution phase of apoptosis is triggered." [GOC:go_curators, GOC:mtg_apoptosis]	104	1275	20	18123	0.0156863	0.192308	Higher in GroupD	['GO:0006974', 'GO:0097193']
GO:BP	GO:0006984	ER-nucleus signaling pathway	0.0920212	FALSE	"Any series of molecular signals that conveys information from the endoplasmic reticulum to the nucleus, usually resulting in a change in transcriptional regulation." [GOC:mah]	53	22	3	18123	0.136364	0.0566038	Higher in GroupB	['GO:0007165']
GO:BP	GO:0000028	ribosomal small subunit assembly	0.0945811	FALSE	"The aggregation, arrangement and bonding together of constituent RNAs and proteins to form the small ribosomal subunit." [GOC:jl]	19	1802	9	18123	0.00499445	0.473684	Higher in GroupD	['GO:0022618', 'GO:0042255', 'GO:0042274']
GO:BP	GO:0016049	cell growth	0.0956649	FALSE	"The process in which a cell irreversibly increases in size over time by accretion and biosynthetic production of matter similar to that already present." [GOC:ai]	497	15	5	18123	0.333333	0.0100604	Higher in GroupB	['GO:0009987', 'GO:0040007']
GO:BP	GO:0030595	leukocyte chemotaxis	0.0966673	FALSE	"The movement of a leukocyte in response to an external stimulus." [GOC:add, GOC:jl]	227	2068	47	18123	0.0227273	0.207048	Higher in GroupD	['GO:0050900', 'GO:0060326']
GO:BP	GO:0030334	regulation of cell migration	0.0970202	FALSE	"Any process that modulates the frequency, rate or extent of cell migration." [GOC:go_curators]	1008	81	15	18123	0.185185	0.014881	Higher in GroupD	['GO:0016477', 'GO:2000145']
GO:BP	GO:0040013	negative regulation of locomotion	0.100029	FALSE	"Any process that stops, prevents, or reduces the frequency, rate or extent of locomotion of a cell or organism." [GOC:go_curators]	408	130	12	18123	0.0923077	0.0294118	Higher in GroupB	['GO:0040011', 'GO:0040012', 'GO:0048519']
GO:BP	GO:0060966	regulation of gene silencing by RNA	0.100623	FALSE	"Any process that regulates the rate, frequency, or extent of gene silencing by RNA. Gene silencing by RNA is the process in which RNA molecules inactivate expression of target genes." [GOC:dph, GOC:tb]	120	840	17	18123	0.0202381	0.141667	Higher in GroupB	['GO:0031047', 'GO:0060968']
REAC	REAC:R-HSA-72312	rRNA processing	0.101018	FALSE	rRNA processing	203	2574	72	10622	0.027972	0.35468	Higher in GroupD	['REAC:R-HSA-8953854']
REAC	REAC:R-HSA-8868773	rRNA processing in the nucleus and cytosol	0.1012	FALSE	rRNA processing in the nucleus and cytosol	193	2331	64	10622	0.027456	0.331606	Higher in GroupD	['REAC:R-HSA-72312']
GO:BP	GO:0050731	positive regulation of peptidyl-tyrosine phosphorylation	0.103611	FALSE	"Any process that activates or increases the frequency, rate or extent of the phosphorylation of peptidyl-tyrosine." [GOC:ai]	199	353	14	18123	0.0396601	0.0703518	Higher in GroupD	['GO:0001934', 'GO:0018108', 'GO:0050730']
GO:BP	GO:0043618	regulation of transcription from RNA polymerase II promoter in response to stress	0.104573	FALSE	"Any process that modulates the frequency, rate or extent of transcription from an RNA polymerase II promoter as a result of a stimulus indicating the organism is under stress. The stress is usually, but not necessarily, exogenous (e.g. temperature, humidity, ionizing radiation)." [GOC:jl]	111	1955	27	18123	0.0138107	0.243243	Higher in GroupD	['GO:0006357', 'GO:0043620']
GO:BP	GO:0019941	modification-dependent protein catabolic process	0.106678	FALSE	"The chemical reactions and pathways resulting in the breakdown of a protein or peptide by hydrolysis of its peptide bonds, initiated by the covalent modification of the target protein." [GOC:go_curators]	670	1143	69	18123	0.0603675	0.102985	Higher in GroupD	['GO:0043632', 'GO:0051603']
GO:BP	GO:0048008	platelet-derived growth factor receptor signaling pathway	0.109812	FALSE	"The series of molecular signals generated as a consequence of a platelet-derived growth factor receptor binding to one of its physiological ligands." [GOC:ceb]	59	645	10	18123	0.0155039	0.169492	Higher in GroupD	['GO:0007169']
GO:BP	GO:0006644	phospholipid metabolic process	0.111175	FALSE	"The chemical reactions and pathways involving phospholipids, any lipid containing phosphoric acid as a mono- or diester." [ISBN:0198506732]	427	1410	57	18123	0.0404255	0.133489	Higher in GroupB	['GO:0006796', 'GO:0019637', 'GO:0044255']
GO:BP	GO:0030205	dermatan sulfate metabolic process	0.112206	FALSE	"The chemical reactions and pathways involving dermatan sulfate, any of a group of glycosaminoglycans with repeats consisting of beta-(1,4)-linked L-iduronyl-beta-(1,3)-N-acetyl-D-galactosamine 4-sulfate units. They are important components of ground substance or intercellular cement of skin and some connective tissues." [GOC:mah, ISBN:0198506732]	14	950	6	18123	0.00631579	0.428571	Higher in GroupB	['GO:0006790', 'GO:0050655', 'GO:1903510']
GO:BP	GO:0040012	regulation of locomotion	0.114076	FALSE	"Any process that modulates the frequency, rate or extent of locomotion of a cell or organism." [GOC:ems]	1113	160	24	18123	0.15	0.0215633	Higher in GroupB	['GO:0040011', 'GO:0050789']
GO:BP	GO:0060548	negative regulation of cell death	0.114982	FALSE	"Any process that decreases the rate or frequency of cell death. Cell death is the specific activation or halting of processes within a cell so that its vital functions markedly cease, rather than simply deteriorating gradually over time, which culminates in cell death." [GOC:BHF, GOC:dph, GOC:tb]	1047	355	40	18123	0.112676	0.0382044	Higher in GroupD	['GO:0008219', 'GO:0010941', 'GO:0048523']
GO:BP	GO:0032365	intracellular lipid transport	0.11527	FALSE	"The directed movement of lipids within cells." [GOC:mah]	48	245	6	18123	0.0244898	0.125	Higher in GroupB	['GO:0006869', 'GO:0046907']
GO:BP	GO:0050920	regulation of chemotaxis	0.115939	FALSE	"Any process that modulates the frequency, rate or extent of the directed movement of a motile cell or organism in response to a specific chemical concentration gradient." [GOC:ai]	228	2135	48	18123	0.0224824	0.210526	Higher in GroupD	['GO:0006935', 'GO:0032101', 'GO:0040012']
GO:BP	GO:0071243	cellular response to arsenic-containing substance	0.115964	FALSE	"Any process that results in a change in state or activity of a cell (in terms of movement, secretion, enzyme production, gene expression, etc.) as a result of an arsenic stimulus from compounds containing arsenic, including arsenates, arsenites, and arsenides." [GOC:mah]	21	351	5	18123	0.014245	0.238095	Higher in GroupD	['GO:0046685', 'GO:0070887']
REAC	REAC:R-HSA-5173105	O-linked glycosylation	0.116574	FALSE	O-linked glycosylation	108	85	6	10622	0.0705882	0.0555556	Higher in GroupB	['REAC:R-HSA-597592']
GO:BP	GO:0034097	response to cytokine	0.117351	FALSE	"Any process that results in a change in state or activity of a cell or an organism (in terms of movement, secretion, enzyme production, gene expression, etc.) as a result of a cytokine stimulus." [GOC:sl]	1242	1118	111	18123	0.0992844	0.089372	Higher in GroupD	['GO:0010033']
GO:BP	GO:0007076	mitotic chromosome condensation	0.119071	FALSE	"The cell cycle process in which chromatin structure is compacted prior to and during mitosis in eukaryotic cells." [GOC:mah, ISBN:0815316194]	41	772	9	18123	0.011658	0.219512	Higher in GroupB	['GO:0000070', 'GO:0030261', 'GO:1903047']
GO:BP	GO:0051130	positive regulation of cellular component organization	0.119161	FALSE	"Any process that activates or increases the frequency, rate or extent of a process involved in the formation, arrangement of constituent parts, or disassembly of cell structures, including the plasma membrane and any external encapsulating structures such as the cell wall and cell envelope." [GOC:ai]	1189	781	80	18123	0.102433	0.0672834	Higher in GroupB	['GO:0016043', 'GO:0048522', 'GO:0051128']
GO:BP	GO:0031055	chromatin remodeling at centromere	0.120243	FALSE	"Dynamic structural changes in centromeric DNA." [GOC:mah]	46	2944	19	18123	0.0064538	0.413043	Higher in GroupB	['GO:0006338']
GO:BP	GO:0016126	sterol biosynthetic process	0.122346	FALSE	"The chemical reactions and pathways resulting in the formation of sterols, steroids with one or more hydroxyl groups and a hydrocarbon side-chain in the molecule." [GOC:go_curators]	70	439	9	18123	0.0205011	0.128571	Higher in GroupB	['GO:0006694', 'GO:0016125', 'GO:1901617']
GO:BP	GO:0030490	maturation of SSU-rRNA	0.123254	FALSE	"Any process involved in the maturation of a precursor Small SubUnit (SSU) ribosomal RNA (rRNA) molecule into a mature SSU-rRNA molecule." [GOC:curators]	50	2187	17	18123	0.00777321	0.34	Higher in GroupD	['GO:0006364', 'GO:0042274']
GO:BP	GO:0003207	cardiac chamber formation	0.124573	FALSE	"The developmental process pertaining to the initial formation of a cardiac chamber from unspecified parts. A cardiac chamber is an enclosed cavity within the heart." [GOC:mtg_heart]	12	2573	8	18123	0.00310921	0.666667	Higher in GroupB	['GO:0003206', 'GO:0048646']
GO:BP	GO:0051240	positive regulation of multicellular organismal process	0.12485	FALSE	"Any process that activates or increases the frequency, rate or extent of an organismal process, any of the processes pertinent to the function of an organism above the cellular level; includes the integrated processes of tissues and organs." [GOC:ai]	1497	1311	148	18123	0.112891	0.0988644	Higher in GroupD	['GO:0032501', 'GO:0048518', 'GO:0051239']
GO:BP	GO:0002573	myeloid leukocyte differentiation	0.126779	FALSE	"The process in which a relatively unspecialized myeloid precursor cell acquires the specialized features of any cell of the myeloid leukocyte lineage." [GOC:add, PMID:16551251]	221	1414	35	18123	0.0247525	0.158371	Higher in GroupD	['GO:0002521', 'GO:0030099']
GO:BP	GO:1902652	secondary alcohol metabolic process	0.127285	FALSE	"The chemical reactions and pathways involving secondary alcohol." [GO_REF:0000068, GOC:mengo_curators, GOC:TermGenie, PMID:11288200]	156	463	14	18123	0.0302376	0.0897436	Higher in GroupB	['GO:0006066']
GO:BP	GO:0006023	aminoglycan biosynthetic process	0.132396	FALSE	"The chemical reactions and pathways resulting in the formation of aminoglycans, any polymer containing amino groups that consists of more than about 10 monosaccharide residues joined to each other by glycosidic linkages." [GOC:ai, ISBN:0198506732]	114	1395	22	18123	0.0157706	0.192982	Higher in GroupB	['GO:0006022', 'GO:0009059', 'GO:1901137', 'GO:1901566']
REAC	REAC:R-HSA-157579	Telomere Maintenance	0.133214	FALSE	Telomere Maintenance	112	1202	26	10622	0.0216306	0.232143	Higher in GroupB	['REAC:R-HSA-73886']
REAC	REAC:R-HSA-75158	TRAIL signaling	0.134683	FALSE	TRAIL signaling	8	181	3	10622	0.0165746	0.375	Higher in GroupD	['REAC:R-HSA-73887']
GO:BP	GO:0071900	regulation of protein serine/threonine kinase activity	0.135599	FALSE	"Any process that modulates the rate, frequency, or extent of protein serine/threonine kinase activity." [GOC:mah]	500	851	44	18123	0.0517039	0.088	Higher in GroupD	['GO:0045859']
REAC	REAC:R-HSA-194315	Signaling by Rho GTPases	0.136355	FALSE	Signaling by Rho GTPases	459	679	49	10622	0.0721649	0.106754	Higher in GroupB	['REAC:R-HSA-9716542']
REAC	REAC:R-HSA-9716542	Signaling by Rho GTPases, Miro GTPases and RHOBTB3	0.136355	FALSE	Signaling by Rho GTPases, Miro GTPases and RHOBTB3	459	679	49	10622	0.0721649	0.106754	Higher in GroupB	['REAC:R-HSA-162582']
GO:BP	GO:0010647	positive regulation of cell communication	0.136528	FALSE	"Any process that increases the frequency, rate or extent of cell communication. Cell communication is the process that mediates interactions between a cell and its surroundings. Encompasses interactions such as signaling or attachment between one cell and another cell, between a cell and an extracellular matrix, or between a cell and any other aspect of its environment." [GOC:dph, GOC:tb]	1809	12	7	18123	0.583333	0.00386954	Higher in GroupD	['GO:0007154', 'GO:0010646', 'GO:0048522']
GO:BP	GO:0043408	regulation of MAPK cascade	0.13741	FALSE	"Any process that modulates the frequency, rate or extent of signal transduction mediated by the MAP kinase (MAPK) cascade." [GOC:go_curators]	734	100	14	18123	0.14	0.0190736	Higher in GroupD	['GO:0000165', 'GO:1902531']
GO:BP	GO:0023056	positive regulation of signaling	0.139013	FALSE	"Any process that activates, maintains or increases the frequency, rate or extent of a signaling process." [GOC:mtg_signal]	1814	12	7	18123	0.583333	0.00385888	Higher in GroupD	['GO:0023051', 'GO:0023052', 'GO:0048518']
GO:BP	GO:0010498	proteasomal protein catabolic process	0.139575	FALSE	"The chemical reactions and pathways resulting in the breakdown of a protein or peptide by hydrolysis of its peptide bonds that is mediated by the proteasome." [GOC:tb]	501	1842	79	18123	0.0428882	0.157685	Higher in GroupD	['GO:0030163', 'GO:0051603']
GO:BP	GO:0014909	smooth muscle cell migration	0.140479	FALSE	"The orderly movement of a smooth muscle cell from one site to another, often during the development of a multicellular organism." [CL:0000192, GOC:mtg_muscle]	98	244	8	18123	0.0327869	0.0816327	Higher in GroupB	['GO:0014812']
GO:BP	GO:2000273	positive regulation of signaling receptor activity	0.140776	FALSE	"Any process that activates or increases the frequency, rate or extent of signaling receptor activity." [GOC:obol]	45	269	6	18123	0.0223048	0.133333	Higher in GroupD	['GO:0010469', 'GO:0044093']
GO:BP	GO:0001666	response to hypoxia	0.141131	FALSE	"Any process that results in a change in state or activity of a cell or an organism (in terms of movement, secretion, enzyme production, gene expression, etc.) as a result of a stimulus indicating lowered oxygen tension. Hypoxia, defined as a decline in O2 levels below normoxic levels of 20.8 - 20.95%, results in metabolic adaptation at both the cellular and organismal level." [GOC:hjd]	367	1619	56	18123	0.0345893	0.152589	Higher in GroupD	['GO:0006950', 'GO:0036293']
GO:BP	GO:1902930	regulation of alcohol biosynthetic process	0.141809	FALSE	"Any process that modulates the frequency, rate or extent of alcohol biosynthetic process." [GO_REF:0000058, GOC:mengo_curators, GOC:TermGenie, PMID:23332010]	54	137	5	18123	0.0364964	0.0925926	Higher in GroupB	['GO:0009889', 'GO:0046165', 'GO:0062012']
GO:BP	GO:0070482	response to oxygen levels	0.142042	FALSE	"Any process that results in a change in state or activity of a cell or an organism (in terms of movement, secretion, enzyme production, gene expression, etc.) as a result of a stimulus reflecting the presence, absence, or concentration of oxygen." [GOC:BHF, GOC:mah]	410	1619	61	18123	0.0376776	0.14878	Higher in GroupD	['GO:0009628']
GO:BP	GO:0002521	leukocyte differentiation	0.152047	FALSE	"The process in which a relatively unspecialized hemopoietic precursor cell acquires the specialized features of a leukocyte. A leukocyte is an achromatic cell of the myeloid or lymphoid lineages capable of ameboid movement, found in blood or other tissue." [CL:0000738, GOC:add, PMID:16551264]	566	616	38	18123	0.0616883	0.0671378	Higher in GroupD	['GO:0030097', 'GO:0030154']
GO:BP	GO:0008610	lipid biosynthetic process	0.152267	FALSE	"The chemical reactions and pathways resulting in the formation of lipids, compounds soluble in an organic solvent but not, or sparingly, in an aqueous solvent." [GOC:go_curators]	768	439	37	18123	0.0842825	0.0481771	Higher in GroupB	['GO:0006629', 'GO:1901576']
GO:BP	GO:1903362	regulation of cellular protein catabolic process	0.152905	FALSE	"Any process that modulates the frequency, rate or extent of cellular protein catabolic process." [GO_REF:0000058, GOC:kmv, GOC:obol, GOC:TermGenie, PMID:24785082]	258	1629	43	18123	0.0263966	0.166667	Higher in GroupD	['GO:0031329', 'GO:0032268', 'GO:0042176', 'GO:0044257']
GO:BP	GO:0034080	CENP-A containing nucleosome assembly	0.153518	FALSE	"The formation of nucleosomes containing the histone H3 variant CENP-A to form centromeric chromatin. This specialised chromatin occurs at centromeric region in point centromeres, and the central core in modular centromeres." [GOC:mah, GOC:vw, PMID:18158900, PMID:19217403]	43	2944	18	18123	0.00611413	0.418605	Higher in GroupB	['GO:0006336', 'GO:0031055', 'GO:0034508', 'GO:0043486', 'GO:0061641']
GO:BP	GO:0061641	CENP-A containing chromatin organization	0.153518	FALSE	"Any process that results in the specification, formation or maintenance of the physical structure of CENP-A containing chromatin." [GOC:dph]	43	2944	18	18123	0.00611413	0.418605	Higher in GroupB	['GO:0006325']
REAC	REAC:R-HSA-5083635	Defective B3GALTL causes Peters-plus syndrome (PpS)	0.155158	FALSE	Defective B3GALTL causes Peters-plus syndrome (PpS)	35	8	2	10622	0.25	0.0571429	Higher in GroupB	['REAC:R-HSA-3906995']
GO:BP	GO:0048583	regulation of response to stimulus	0.156838	FALSE	"Any process that modulates the frequency, rate or extent of a response to a stimulus. Response to stimulus is a change in state or activity of a cell or an organism (in terms of movement, secretion, enzyme production, gene expression, etc.) as a result of a stimulus." [GOC:jid]	4416	102	43	18123	0.421569	0.00973732	Higher in GroupD	['GO:0050789', 'GO:0050896']
GO:BP	GO:0042127	regulation of cell population proliferation	0.157035	FALSE	"Any process that modulates the frequency, rate or extent of cell proliferation." [GOC:jl]	1774	145	30	18123	0.206897	0.0169109	Higher in GroupB	['GO:0008283', 'GO:0050794']
GO:BP	GO:0006950	response to stress	0.157466	FALSE	"Any process that results in a change in state or activity of a cell or an organism (in terms of movement, secretion, enzyme production, gene expression, etc.) as a result of a disturbance in organismal or cellular homeostasis, usually, but not necessarily, exogenous (e.g. temperature, humidity, ionizing radiation)." [GOC:mah]	4321	104	43	18123	0.413462	0.0099514	Higher in GroupD	['GO:0050896']
GO:BP	GO:0006285	base-excision repair, AP site formation	0.160592	FALSE	"The formation of an AP site, a deoxyribose sugar with a missing base, by DNA glycosylase which recognizes an altered base in DNA and catalyzes its hydrolytic removal. This sugar phosphate is the substrate recognized by the AP endonuclease, which cuts the DNA phosphodiester backbone at the 5' side of the altered site to leave a gap which is subsequently repaired." [ISBN:0815316194]	33	781	8	18123	0.0102433	0.242424	Higher in GroupB	['GO:0006259', 'GO:0006284']
GO:BP	GO:0043085	positive regulation of catalytic activity	0.161533	FALSE	"Any process that activates or increases the activity of an enzyme." [GOC:ebc, GOC:jl, GOC:tb, GOC:vw]	1383	70	16	18123	0.228571	0.0115691	Higher in GroupD	['GO:0044093', 'GO:0050790']
REAC	REAC:R-HSA-5173214	O-glycosylation of TSR domain-containing proteins	0.164223	FALSE	O-glycosylation of TSR domain-containing proteins	36	8	2	10622	0.25	0.0555556	Higher in GroupB	['REAC:R-HSA-5173105']
GO:BP	GO:2001234	negative regulation of apoptotic signaling pathway	0.164733	FALSE	"Any process that stops, prevents or reduces the frequency, rate or extent of apoptotic signaling pathway." [GOC:mtg_apoptosis]	237	2079	48	18123	0.023088	0.202532	Higher in GroupD	['GO:0009968', 'GO:0043066', 'GO:0097190', 'GO:2001233']
GO:BP	GO:0044265	cellular macromolecule catabolic process	0.168591	FALSE	"The chemical reactions and pathways resulting in the breakdown of a macromolecule, any large molecule including proteins, nucleic acids and carbohydrates, as carried out by individual cells." [GOC:jl]	1244	1126	111	18123	0.098579	0.0892283	Higher in GroupD	['GO:0009057', 'GO:0044248', 'GO:0044260']
GO:BP	GO:1902001	fatty acid transmembrane transport	0.169329	FALSE	"The process in which a fatty acid is transported across a membrane." [GOC:rb, GOC:TermGenie, PMID:9395310]	25	521	6	18123	0.0115163	0.24	Higher in GroupD	['GO:0015908', 'GO:1905039']
REAC	REAC:R-HSA-5221030	TET1,2,3 and TDG demethylate DNA	0.170821	FALSE	TET1,2,3 and TDG demethylate DNA	4	79	2	10622	0.0253165	0.5	Higher in GroupD	['REAC:R-HSA-212165']
GO:BP	GO:0048145	regulation of fibroblast proliferation	0.17283	FALSE	"Any process that modulates the frequency, rate or extent of multiplication or reproduction of fibroblast cells." [GOC:jid]	87	209	7	18123	0.0334928	0.0804598	Higher in GroupB	['GO:0042127', 'GO:0048144']
KEGG	KEGG:04151	PI3K-Akt signaling pathway	0.173474	FALSE	PI3K-Akt signaling pathway	353	12	4	8000	0.333333	0.0113314	Higher in GroupD	['KEGG:00000']
GO:BP	GO:0051270	regulation of cellular component movement	0.176505	FALSE	"Any process that modulates the frequency, rate or extent of the movement of a cellular component." [GOC:ai, GOC:dph, GOC:jl]	1149	972	92	18123	0.0946502	0.0800696	Higher in GroupB	['GO:0006928', 'GO:0032879', 'GO:0050794']
GO:BP	GO:0050651	dermatan sulfate proteoglycan biosynthetic process	0.178721	FALSE	"The chemical reactions and pathways resulting in the formation of dermatan sulfate proteoglycan, any glycoprotein whose glycosaminoglycan units are dermatan sulfate (chondroitin sulfate B). Dermatan sulfate is a glycosaminoglycan with repeats consisting of beta-(1,4)-linked L-iduronyl-beta-(1,3)-N-acetyl-D-galactosamine 4-sulfate units." [GOC:ai]	15	950	6	18123	0.00631579	0.4	Higher in GroupB	['GO:0030166', 'GO:0050655']
GO:BP	GO:0002062	chondrocyte differentiation	0.17898	FALSE	"The process in which a chondroblast acquires specialized structural and/or functional features of a chondrocyte. A chondrocyte is a polymorphic cell that forms cartilage." [GOC:dph]	108	2573	31	18123	0.0120482	0.287037	Higher in GroupB	['GO:0030154', 'GO:0051216']
GO:BP	GO:0002687	positive regulation of leukocyte migration	0.179553	FALSE	"Any process that activates or increases the frequency, rate, or extent of leukocyte migration." [GOC:add]	138	2068	32	18123	0.0154739	0.231884	Higher in GroupD	['GO:0002684', 'GO:0002685', 'GO:0030335', 'GO:0050900']
GO:BP	GO:0001822	kidney development	0.184279	FALSE	"The process whose specific outcome is the progression of the kidney over time, from its formation to the mature structure. The kidney is an organ that filters the blood and/or excretes the end products of body metabolism in the form of urine." [GOC:dph, GOC:mtg_kidney_jan10, ISBN:0124020607, ISBN:0721662544]	294	63	7	18123	0.111111	0.0238095	Higher in GroupB	['GO:0048513', 'GO:0072001']
GO:BP	GO:0048144	fibroblast proliferation	0.185951	FALSE	"The multiplication or reproduction of fibroblast cells, resulting in the expansion of the fibroblast population." [GOC:jid]	88	209	7	18123	0.0334928	0.0795455	Higher in GroupB	['GO:0008283']
GO:BP	GO:2000145	regulation of cell motility	0.190826	FALSE	"Any process that modulates the frequency, rate or extent of cell motility." [GOC:mah]	1070	72	14	18123	0.194444	0.0130841	Higher in GroupD	['GO:0040012', 'GO:0048870', 'GO:0051270']
GO:BP	GO:2000146	negative regulation of cell motility	0.197851	FALSE	"Any process that stops, prevents, or reduces the frequency, rate or extent of cell motility." [GOC:mah]	376	151	12	18123	0.0794702	0.0319149	Higher in GroupB	['GO:0040013', 'GO:0048870', 'GO:0051271', 'GO:2000145']
GO:BP	GO:0043588	skin development	0.19788	FALSE	"The process whose specific outcome is the progression of the skin over time, from its formation to the mature structure. The skin is the external membranous integument of an animal. In vertebrates the skin generally consists of two layers, an outer nonsensitive and nonvascular epidermis (cuticle or skarfskin) composed of cells which are constantly growing and multiplying in the deeper, and being…	426	76	9	18123	0.118421	0.0211268	Higher in GroupD	['GO:0048513']
GO:BP	GO:0033043	regulation of organelle organization	0.198747	FALSE	"Any process that modulates the frequency, rate or extent of a process involved in the formation, arrangement of constituent parts, or disassembly of an organelle." [GOC:mah]	1228	986	98	18123	0.0993915	0.0798046	Higher in GroupB	['GO:0006996', 'GO:0051128']
GO:BP	GO:0071671	regulation of smooth muscle cell chemotaxis	0.199632	FALSE	"Any process that modulates the frequency, rate, or extent of smooth muscle cell chemotaxis." [GOC:mah]	8	1261	5	18123	0.00396511	0.625	Higher in GroupB	['GO:0014910', 'GO:0050920', 'GO:0071670']
GO:BP	GO:0055114	obsolete oxidation-reduction process	0.209151	FALSE	"OBSOLETE. A metabolic process that results in the removal or addition of one or more electrons to or from a substance, with or without the concomitant removal or addition of a proton or protons." [GOC:dhl, GOC:ecd, GOC:jh2, GOC:jid, GOC:mlg, GOC:rph]	475	803	40	18123	0.0498132	0.0842105	Higher in GroupB	[]
GO:BP	GO:0033627	cell adhesion mediated by integrin	0.210951	FALSE	"The attachment of a cell, either to another cell or to an underlying substrate such as the extracellular matrix, via an integrin, a heterodimeric adhesion receptor formed by the non-covalent association of particular alpha and beta subunits." [GOC:add, PMID:12213832, PMID:14754902]	73	56	4	18123	0.0714286	0.0547945	Higher in GroupD	['GO:0007155']
GO:BP	GO:0046631	alpha-beta T cell activation	0.212134	FALSE	"The change in morphology and behavior of an alpha-beta T cell resulting from exposure to a mitogen, cytokine, chemokine, cellular ligand, or an antigen for which it is specific." [GOC:add]	157	362	12	18123	0.0331492	0.0764331	Higher in GroupD	['GO:0042110']
GO:BP	GO:0042176	regulation of protein catabolic process	0.21324	FALSE	"Any process that modulates the frequency, rate or extent of the chemical reactions and pathways resulting in the breakdown of a protein by the destruction of the native, active configuration, with or without the hydrolysis of peptide bonds." [GOC:go_curators, GOC:jl]	401	1644	60	18123	0.0364964	0.149626	Higher in GroupD	['GO:0009894', 'GO:0030163', 'GO:0051246']
GO:BP	GO:0008654	phospholipid biosynthetic process	0.213416	FALSE	"The chemical reactions and pathways resulting in the formation of phospholipids, any lipid containing phosphoric acid as a mono- or diester." [ISBN:0198506732]	305	1484	45	18123	0.0303235	0.147541	Higher in GroupB	['GO:0006644', 'GO:0008610', 'GO:0044249', 'GO:0090407']
GO:BP	GO:0072001	renal system development	0.22258	FALSE	"The process whose specific outcome is the progression of the renal system over time, from its formation to the mature structure. The renal system maintains fluid balance and contributes to electrolyte balance, acid/base balance, and disposal of nitrogenous waste products. In humans, the renal system comprises a pair of kidneys, a pair of ureters, urinary bladder, urethra, sphincter muscle and as…	303	63	7	18123	0.111111	0.0231023	Higher in GroupB	['GO:0001655', 'GO:0048731']
GO:BP	GO:0006325	chromatin organization	0.22498	FALSE	"Any process that results in the specification, formation or maintenance of the physical structure of eukaryotic chromatin." [GOC:mah, GOC:vw, PMID:20404130]	839	1216	85	18123	0.0699013	0.101311	Higher in GroupB	['GO:0016043', 'GO:0051276']
GO:BP	GO:0014912	negative regulation of smooth muscle cell migration	0.225167	FALSE	"Any process that stops, prevents, or reduces the frequency, rate or extent of smooth muscle cell migration." [CL:0000192, GOC:mtg_muscle]	41	476	7	18123	0.0147059	0.170732	Higher in GroupB	['GO:0014909', 'GO:0014910', 'GO:0030336']
GO:BP	GO:0021819	layer formation in cerebral cortex	0.229266	FALSE	"The detachment of cells from radial glial fibers at the appropriate time when they cease to migrate and form distinct layer in the cerebral cortex." [GO_REF:0000021, GOC:cls, GOC:dgh, GOC:dph, GOC:jid, PMID:12626695]	14	324	4	18123	0.0123457	0.285714	Higher in GroupB	['GO:0021801', 'GO:0048646']
GO:BP	GO:0032933	SREBP signaling pathway	0.233913	FALSE	"A series of molecular signals from the endoplasmic reticulum to the nucleus generated as a consequence of decreased levels of one or more sterols (and in some yeast, changes in oxygen levels) and which proceeds through activation of a sterol response element binding transcription factor (SREBP) to result in up-regulation of target gene transcription." [GOC:bf, GOC:mah, GOC:signaling, GOC:vw, PMI…	15	108	3	18123	0.0277778	0.2	Higher in GroupB	['GO:0006984', 'GO:0071501']
GO:BP	GO:0050730	regulation of peptidyl-tyrosine phosphorylation	0.234356	FALSE	"Any process that modulates the frequency, rate or extent of the phosphorylation of peptidyl-tyrosine." [GOC:ai]	270	353	16	18123	0.0453258	0.0592593	Higher in GroupD	['GO:0001932', 'GO:0018108']
REAC	REAC:R-HSA-1059683	Interleukin-6 signaling	0.234748	FALSE	Interleukin-6 signaling	11	31	2	10622	0.0645161	0.181818	Higher in GroupD	['REAC:R-HSA-6783589']
GO:BP	GO:0050921	positive regulation of chemotaxis	0.234905	FALSE	"Any process that activates or increases the frequency, rate or extent of the directed movement of a motile cell or organism in response to a specific chemical concentration gradient." [GOC:ai]	143	2113	33	18123	0.0156176	0.230769	Higher in GroupD	['GO:0006935', 'GO:0032103', 'GO:0040017', 'GO:0050920']
GO:BP	GO:0051271	negative regulation of cellular component movement	0.241539	FALSE	"Any process that stops, prevents, or reduces the frequency, rate or extent of the movement of a cellular component." [GOC:ai, GOC:dph, GOC:jl]	384	151	12	18123	0.0794702	0.03125	Higher in GroupB	['GO:0006928', 'GO:0048523', 'GO:0051270']
GO:BP	GO:1903052	positive regulation of proteolysis involved in cellular protein catabolic process	0.241744	FALSE	"Any process that activates or increases the frequency, rate or extent of proteolysis involved in cellular protein catabolic process." [GO_REF:0000058, GOC:BHF, GOC:rl, GOC:TermGenie, PMID:18307834]	135	301	10	18123	0.0332226	0.0740741	Higher in GroupD	['GO:0045862', 'GO:0051603', 'GO:1903050', 'GO:1903364']
REAC	REAC:R-HSA-6783589	Interleukin-6 family signaling	0.248886	FALSE	Interleukin-6 family signaling	24	466	6	10622	0.0128755	0.25	Higher in GroupD	['REAC:R-HSA-449147']
GO:BP	GO:0016233	telomere capping	0.250648	FALSE	"A process in which telomeres are protected from degradation and fusion, thereby ensuring chromosome stability by protecting the ends from both degradation and from being recognized as damaged DNA. May be mediated by specific single- or double-stranded telomeric DNA binding proteins." [GOC:mah, GOC:rn, PMID:11349150, PMID:11352055]	55	772	10	18123	0.0129534	0.181818	Higher in GroupB	['GO:0000723']
REAC	REAC:R-HSA-5693607	Processing of DNA double-strand break ends	0.251373	FALSE	Processing of DNA double-strand break ends	98	1202	23	10622	0.0191348	0.234694	Higher in GroupB	['REAC:R-HSA-5693567']
GO:BP	GO:0086100	endothelin receptor signaling pathway	0.252133	FALSE	"A series of molecular signals initiated by an endothelin receptor binding to one of its physiological ligands, and proceeding with the activated receptor promoting the exchange of GDP for GTP on the alpha-subunit of an associated heterotrimeric G-protein complex. Ends with regulation of a downstream cellular process, e.g. transcription." [GOC:bf, GOC:BHF, GOC:mtg_cardiac_conduct_nov11, PMID:1097…	7	1581	5	18123	0.00316256	0.714286	Higher in GroupD	['GO:0007186']
GO:BP	GO:0050810	regulation of steroid biosynthetic process	0.254575	FALSE	"Any process that modulates the frequency, rate or extent of the chemical reactions and pathways resulting in the formation of steroids, compounds with a 1,2,cyclopentanoperhydrophenanthrene nucleus." [GOC:ai]	73	266	7	18123	0.0263158	0.0958904	Higher in GroupB	['GO:0006694', 'GO:0019218', 'GO:0046890']
GO:BP	GO:0021910	smoothened signaling pathway involved in ventral spinal cord patterning	0.263184	FALSE	"The series of molecular signals generated as a consequence of activation of the transmembrane protein Smoothened that results in the spatial identity of regions along the dorsal-ventral axis of the spinal cord." [GO_REF:0000021, GOC:cls, GOC:dgh, GOC:dph, GOC:jid, GOC:tb, PMID:11262869]	6	942	4	18123	0.00424628	0.666667	Higher in GroupB	['GO:0007224', 'GO:0021513']
KEGG	KEGG:05145	Toxoplasmosis	0.265034	FALSE	Toxoplasmosis	109	98	6	8000	0.0612245	0.0550459	Higher in GroupD	['KEGG:00000']
GO:BP	GO:0009888	tissue development	0.268206	FALSE	"The process whose specific outcome is the progression of a tissue over time, from its formation to the mature structure." [ISBN:0471245208]	2093	221	45	18123	0.20362	0.0215002	Higher in GroupB	['GO:0048856']
GO:BP	GO:0048869	cellular developmental process	0.269407	FALSE	"A biological process whose specific outcome is the progression of a cell over time from an initial condition to a later condition." [GOC:isa_complete]	4468	246	87	18123	0.353659	0.0194718	Higher in GroupB	['GO:0009987', 'GO:0032502']
GO:BP	GO:0030518	intracellular steroid hormone receptor signaling pathway	0.273108	FALSE	"A series of molecular signals generated as a consequence of a intracellular steroid hormone receptor binding to one of its physiological ligands." [GOC:mah, GOC:signaling]	155	840	19	18123	0.022619	0.122581	Higher in GroupB	['GO:0030522', 'GO:0043401']
KEGG	KEGG:04512	ECM-receptor interaction	0.274637	FALSE	ECM-receptor interaction	88	24	3	8000	0.125	0.0340909	Higher in GroupD	['KEGG:00000']
GO:BP	GO:0048545	response to steroid hormone	0.276702	FALSE	"Any process that results in a change in state or activity of a cell or an organism (in terms of movement, secretion, enzyme production, gene expression, etc.) as a result of a steroid hormone stimulus." [GOC:go_curators]	385	869	36	18123	0.0414269	0.0935065	Higher in GroupB	['GO:0009725', 'GO:0014070', 'GO:0033993']
GO:BP	GO:0001655	urogenital system development	0.279448	FALSE	"The process whose specific outcome is the progression of the urogenital system over time, from its formation to the mature structure." [GOC:go_curators]	339	1470	48	18123	0.0326531	0.141593	Higher in GroupB	['GO:0048731']
GO:BP	GO:0045595	regulation of cell differentiation	0.28221	FALSE	"Any process that modulates the frequency, rate or extent of cell differentiation, the process in which relatively unspecialized cells acquire specialized structural and functional features." [GOC:go_curators]	1688	971	125	18123	0.128733	0.0740521	Higher in GroupB	['GO:0030154', 'GO:0050793', 'GO:0050794']
GO:BP	GO:0032502	developmental process	0.282381	FALSE	"A biological process whose specific outcome is the progression of an integrated living unit: an anatomical structure (which may be a subcellular structure, cell, tissue, or organ), or organism over time from an initial condition to a later condition." [GOC:isa_complete]	6678	20	16	18123	0.8	0.00239593	Higher in GroupD	['GO:0008150']
KEGG	KEGG:05034	Alcoholism	0.285078	FALSE	Alcoholism	187	885	34	8000	0.0384181	0.181818	Higher in GroupB	['KEGG:00000']
GO:BP	GO:0071501	cellular response to sterol depletion	0.286646	FALSE	"Any process that results in a change in state or activity of a cell (in terms of movement, secretion, enzyme production, gene expression, etc.) as a result of a stimulus indicating deprivation of sterols. Sterols are a group of steroids characterized by the presence of one or more hydroxyl groups and a hydrocarbon side-chain in the molecule." [GOC:mah]	16	108	3	18123	0.0277778	0.1875	Higher in GroupB	['GO:0006991', 'GO:0033554']
GO:BP	GO:0032147	activation of protein kinase activity	0.290162	FALSE	"Any process that initiates the activity of an inactive protein kinase." [GOC:mah]	334	353	18	18123	0.0509915	0.0538922	Higher in GroupD	['GO:0045860']
GO:BP	GO:0050924	positive regulation of negative chemotaxis	0.290413	FALSE	"Any process that activates or increases the frequency, rate or extent of the directed movement of a motile cell or organism towards a lower concentration in a concentration gradient of a specific chemical." [GOC:ai]	1	2	1	18123	0.5	1	Higher in GroupB	['GO:0050919', 'GO:0050921', 'GO:0050923']
GO:BP	GO:0021972	corticospinal neuron axon guidance through spinal cord	0.290413	FALSE	"The process in which the migration of an axon growth cone of a pyramidal cell that is part of the corticospinal tract is directed after decussation through the spinal cord in response to a combination of attractive and repulsive cues." [GO_REF:0000021, GOC:cls, GOC:dgh, GOC:dph, GOC:jid, PMID:9878731]	1	2	1	18123	0.5	1	Higher in GroupB	['GO:0007411', 'GO:0021966']
GO:BP	GO:0050929	induction of negative chemotaxis	0.290413	FALSE	"Any process that initiates the directed movement of a motile cell or organism towards a lower concentration in a concentration gradient of a specific chemical." [GOC:ai]	1	2	1	18123	0.5	1	Higher in GroupB	['GO:0050924']
GO:BP	GO:0006097	glyoxylate cycle	0.290782	FALSE	"A modification of the TCA cycle occurring in some plants and microorganisms, in which isocitrate is cleaved to glyoxylate and succinate. Glyoxylate can then react with acetyl-CoA to form malate." [ISBN:0198506732]	2	191	2	18123	0.0104712	1	Higher in GroupB	['GO:0044262', 'GO:0046487']
REAC	REAC:R-HSA-418889	Caspase activation via Dependence Receptors in the absence of ligand	0.292964	FALSE	Caspase activation via Dependence Receptors in the absence of ligand	10	38	2	10622	0.0526316	0.2	Higher in GroupB	['REAC:R-HSA-5357769']
REAC	REAC:R-HSA-5607761	Dectin-1 mediated noncanonical NF-kB signaling	0.29378	FALSE	Dectin-1 mediated noncanonical NF-kB signaling	60	2076	23	10622	0.011079	0.383333	Higher in GroupD	['REAC:R-HSA-5607764']
GO:BP	GO:0001959	regulation of cytokine-mediated signaling pathway	0.297345	FALSE	"Any process that modulates the frequency, rate or extent of the cytokine mediated signaling pathway." [GOC:hjd]	188	2	2	18123	1	0.0106383	Higher in GroupD	['GO:0009966', 'GO:0019221', 'GO:0060759']
GO:BP	GO:0061181	regulation of chondrocyte development	0.297497	FALSE	"Any process that modulates the rate, frequency, or extent of the process whose specific outcome is the progression of a chondrocyte over time, from its commitment to its mature state. Chondrocyte development does not include the steps involved in committing a chondroblast to a chondrocyte fate." [GOC:BHF, GOC:dph]	5	60	2	18123	0.0333333	0.4	Higher in GroupD	['GO:0002063', 'GO:0032330', 'GO:0060284']
GO:BP	GO:0070268	cornification	0.298228	FALSE	"A type of programmed cell death that occurs in the epidermis, morphologically and biochemically distinct from apoptosis. It leads to the formation of corneocytes, i.e. dead keratinocytes containing an amalgam of specific proteins (e.g., keratin, loricrin, SPR and involucrin) and lipids (e.g., fatty acids and ceramides), which are necessary for the function of the cornified skin layer (mechanical…	112	76	5	18123	0.0657895	0.0446429	Higher in GroupD	['GO:0012501', 'GO:0031424']
KEGG	KEGG:04917	Prolactin signaling pathway	0.301713	FALSE	Prolactin signaling pathway	70	31	3	8000	0.0967742	0.0428571	Higher in GroupD	['KEGG:00000']
GO:BP	GO:1902904	negative regulation of supramolecular fiber organization	0.301966	FALSE	"Any process that stops, prevents or reduces the frequency, rate or extent of fibril organization." [GO_REF:0000058, GOC:PARL, GOC:rl, GOC:TermGenie, PMID:23921388]	173	756	19	18123	0.0251323	0.109827	Higher in GroupB	['GO:0051129', 'GO:0097435', 'GO:1902903']
GO:BP	GO:0045862	positive regulation of proteolysis	0.304506	FALSE	"Any process that activates or increases the frequency, rate or extent of the hydrolysis of a peptide bond or bonds within a protein." [GOC:go_curators]	383	2209	72	18123	0.0325939	0.18799	Higher in GroupD	['GO:0006508', 'GO:0030162', 'GO:0032270']
GO:BP	GO:0050000	chromosome localization	0.312618	FALSE	"Any process in which a chromosome is transported to, or maintained in, a specific location." [GOC:ai]	84	837	13	18123	0.0155317	0.154762	Higher in GroupB	['GO:0051640']
GO:BP	GO:0000462	maturation of SSU-rRNA from tricistronic rRNA transcript (SSU-rRNA, 5.8S rRNA, LSU-rRNA)	0.31296	FALSE	"Any process involved in the maturation of a precursor Small SubUnit (SSU) ribosomal RNA (rRNA) molecule into a mature SSU-rRNA molecule from the pre-rRNA molecule originally produced as a tricistronic rRNA transcript that contains the Small Subunit (SSU) rRNA, 5.8S rRNA, and the Large Subunit (LSU) in that order from 5' to 3' along the primary transcript." [GOC:curators]	37	1742	12	18123	0.00688863	0.324324	Higher in GroupD	['GO:0030490']
GO:BP	GO:0006740	NADPH regeneration	0.315207	FALSE	"A metabolic process that generates a pool of NADPH by the reduction of NADP+." [GOC:mah]	18	267	4	18123	0.0149813	0.222222	Higher in GroupB	['GO:0006091', 'GO:0006739']
GO:BP	GO:1901135	carbohydrate derivative metabolic process	0.319542	FALSE	"The chemical reactions and pathways involving carbohydrate derivative." [GOC:TermGenie]	1152	135	21	18123	0.155556	0.0182292	Higher in GroupB	['GO:0071704']
GO:BP	GO:0030111	regulation of Wnt signaling pathway	0.321189	FALSE	"Any process that modulates the frequency, rate or extent of the activity of the Wnt signal transduction pathway." [GOC:dph, GOC:mah, GOC:tb]	380	1027	40	18123	0.0389484	0.105263	Higher in GroupB	['GO:0009966', 'GO:0016055']
KEGG	KEGG:05200	Pathways in cancer	0.324155	FALSE	Pathways in cancer	529	5	3	8000	0.6	0.00567108	Higher in GroupD	['KEGG:00000']
GO:BP	GO:0006412	translation	0.324325	FALSE	"The cellular metabolic process in which a protein is formed, using the sequence of a mature mRNA or circRNA molecule to specify the sequence of amino acids in a polypeptide chain. Translation is mediated by the ribosome, and begins with the formation of a ternary complex between aminoacylated initiator methionine tRNA, GTP, and initiation factor 2, which subsequently associates with the small su…	804	1833	114	18123	0.0621931	0.141791	Higher in GroupD	['GO:0010467', 'GO:0034645', 'GO:0043043', 'GO:0044267']
REAC	REAC:R-HSA-1474244	Extracellular matrix organization	0.325405	FALSE	Extracellular matrix organization	298	103	10	10622	0.0970874	0.033557	Higher in GroupB	['REAC:0000000']
GO:BP	GO:0032330	regulation of chondrocyte differentiation	0.329031	FALSE	"Any process that modulates the frequency, rate or extent of chondrocyte differentiation." [GOC:mah]	52	2506	18	18123	0.00718276	0.346154	Higher in GroupB	['GO:0002062', 'GO:0045595', 'GO:0061035']
GO:BP	GO:0001501	skeletal system development	0.330993	FALSE	"The process whose specific outcome is the progression of the skeleton over time, from its formation to the mature structure. The skeleton is the bony framework of the body in vertebrates (endoskeleton) or the hard outer envelope of insects (exoskeleton or dermoskeleton)." [GOC:dph, GOC:jid, GOC:tb]	509	1284	59	18123	0.0459502	0.115914	Higher in GroupB	['GO:0048731']
GO:BP	GO:0000070	mitotic sister chromatid segregation	0.332939	FALSE	"The cell cycle process in which replicated homologous chromosomes are organized and then physically separated and apportioned to two sets during the mitotic cell cycle. Each replicated chromosome, composed of two sister chromatids, aligns at the cell equator, paired with its homologous partner. One homolog of each morphologic type goes into each of the resulting chromosome sets." [GOC:ai, GOC:jl]	185	772	20	18123	0.0259067	0.108108	Higher in GroupB	['GO:0000819', 'GO:0140014', 'GO:1903047']
GO:BP	GO:0014812	muscle cell migration	0.339321	FALSE	"The orderly movement of a muscle cell from one site to another, often during the development of a multicellular organism." [CL:0000187, GOC:mtg_muscle]	111	244	8	18123	0.0327869	0.0720721	Higher in GroupB	['GO:0016477']
GO:BP	GO:0060759	regulation of response to cytokine stimulus	0.340007	FALSE	"Any process that modulates the rate, frequency, or extent of a response to cytokine stimulus." [GOC:BHF, GOC:dph, GOC:tb]	201	2	2	18123	1	0.00995025	Higher in GroupD	['GO:0034097', 'GO:0048583']
GO:BP	GO:0090407	organophosphate biosynthetic process	0.345629	FALSE	"The chemical reactions and pathways resulting in the biosynthesis of deoxyribose phosphate, the phosphorylated sugar 2-deoxy-erythro-pentose." [GOC:chem_mtg]	620	1672	85	18123	0.0508373	0.137097	Higher in GroupB	['GO:0019637', 'GO:1901576']
GO:BP	GO:0032200	telomere organization	0.346585	FALSE	"A process that is carried out at the cellular level which results in the assembly, arrangement of constituent parts, or disassembly of telomeres, terminal regions of a linear chromosome that include the telomeric DNA repeats and associated proteins." [GOC:dph, GOC:jl, GOC:mah]	183	783	20	18123	0.0255428	0.10929	Higher in GroupB	['GO:0051276']
GO:BP	GO:0030036	actin cytoskeleton organization	0.347002	FALSE	"A process that is carried out at the cellular level which results in the assembly, arrangement of constituent parts, or disassembly of cytoskeletal structures comprising actin filaments and their associated proteins." [GOC:dph, GOC:jl, GOC:mah]	712	977	62	18123	0.0634596	0.0870787	Higher in GroupB	['GO:0007010', 'GO:0030029']
REAC	REAC:R-HSA-9634600	Regulation of glycolysis by fructose 2,6-bisphosphate metabolism	0.347763	FALSE	Regulation of glycolysis by fructose 2,6-bisphosphate metabolism	12	384	4	10622	0.0104167	0.333333	Higher in GroupD	['REAC:R-HSA-70171']
GO:BP	GO:0009968	negative regulation of signal transduction	0.349041	FALSE	"Any process that stops, prevents, or reduces the frequency, rate or extent of signal transduction." [GOC:sm]	1394	89	18	18123	0.202247	0.0129125	Higher in GroupD	['GO:0007165', 'GO:0009966', 'GO:0010648', 'GO:0023057', 'GO:0048585']
GO:BP	GO:1902903	regulation of supramolecular fiber organization	0.35278	FALSE	"Any process that modulates the frequency, rate or extent of supramolecular fiber organization." [GO_REF:0000058, GOC:PARL, GOC:rl, GOC:TermGenie, PMID:23921388]	391	1427	52	18123	0.0364401	0.132992	Higher in GroupB	['GO:0051128', 'GO:0097435']
GO:BP	GO:1903025	regulation of RNA polymerase II regulatory region sequence-specific DNA binding	0.360611	FALSE	"Any process that modulates the frequency, rate or extent of RNA polymerase II regulatory region sequence-specific DNA binding." [GO_REF:0000059, GOC:dph, GOC:krc, GOC:TermGenie, PMID:20026326]	14	1159	6	18123	0.00517688	0.428571	Higher in GroupD	['GO:2000677']
GO:BP	GO:0019538	protein metabolic process	0.368745	FALSE	"The chemical reactions and pathways involving a protein. Includes protein modification." [GOC:ma]	5912	334	141	18123	0.422156	0.0238498	Higher in GroupD	['GO:0043170', 'GO:0044238', 'GO:1901564']
REAC	REAC:R-HSA-2022923	Dermatan sulfate biosynthesis	0.369292	FALSE	Dermatan sulfate biosynthesis	11	786	5	10622	0.00636132	0.454545	Higher in GroupB	['REAC:R-HSA-1793185']
REAC	REAC:R-HSA-1566948	Elastic fibre formation	0.370744	FALSE	Elastic fibre formation	44	98	4	10622	0.0408163	0.0909091	Higher in GroupB	['REAC:R-HSA-1474244']
KEGG	KEGG:04060	Cytokine-cytokine receptor interaction	0.376412	FALSE	Cytokine-cytokine receptor interaction	293	98	10	8000	0.102041	0.0341297	Higher in GroupD	['KEGG:00000']
GO:BP	GO:1904026	regulation of collagen fibril organization	0.382944	FALSE	"Any process that modulates the frequency, rate or extent of collagen fibril organization." [GO_REF:0000058, GOC:TermGenie, PMID:25451920]	8	42	2	18123	0.047619	0.25	Higher in GroupB	['GO:0030199', 'GO:1902903', 'GO:1903053']
GO:BP	GO:0061136	regulation of proteasomal protein catabolic process	0.39349	FALSE	"Any process that modulates the rate, frequency, or extent of the chemical reactions and pathways resulting in the breakdown of a protein or peptide by hydrolysis of its peptide bonds that is mediated by the proteasome." [GOC:dph, GOC:tb]	189	1619	33	18123	0.020383	0.174603	Higher in GroupD	['GO:0010498', 'GO:1903050']
GO:BP	GO:0006196	AMP catabolic process	0.395497	FALSE	"The chemical reactions and pathways resulting in the breakdown of AMP, adenosine monophosphate." [ISBN:0198506732]	4	1981	4	18123	0.00201918	1	Higher in GroupD	['GO:0009154', 'GO:0009169', 'GO:0046033']
REAC	REAC:R-HSA-112409	RAF-independent MAPK1/3 activation	0.400366	FALSE	RAF-independent MAPK1/3 activation	22	20	2	10622	0.1	0.0909091	Higher in GroupD	['REAC:R-HSA-5684996']
GO:BP	GO:0016477	cell migration	0.400443	FALSE	"The controlled self-propelled movement of a cell from one site to a destination guided by molecular cues. Cell migration is a central process in the development and maintenance of multicellular organisms." [GOC:cjm, GOC:dph, GOC:ems, GOC:pf, Wikipedia:Cell_migration]	1660	83	19	18123	0.228916	0.0114458	Higher in GroupD	['GO:0048870']
REAC	REAC:R-HSA-8985586	SLIT2:ROBO1 increases RHOA activity	0.400557	FALSE	SLIT2:ROBO1 increases RHOA activity	4	2	1	10622	0.5	0.25	Higher in GroupB	['REAC:R-HSA-376176']
GO:BP	GO:2000503	positive regulation of natural killer cell chemotaxis	0.401696	FALSE	"Any process that activates or increases the frequency, rate or extent of natural killer cell chemotaxis." [GOC:BHF]	6	57	2	18123	0.0350877	0.333333	Higher in GroupD	['GO:0035747', 'GO:0140131', 'GO:2000501']
GO:BP	GO:0071345	cellular response to cytokine stimulus	0.403282	FALSE	"Any process that results in a change in state or activity of a cell (in terms of movement, secretion, enzyme production, gene expression, etc.) as a result of a cytokine stimulus." [GOC:mah]	1148	72	14	18123	0.194444	0.0121951	Higher in GroupD	['GO:0034097', 'GO:0071310']
GO:BP	GO:0050655	dermatan sulfate proteoglycan metabolic process	0.40368	FALSE	"The chemical reactions and pathways involving dermatan sulfate proteoglycan, any glycoprotein whose glycosaminoglycan units are dermatan sulfate (chondroitin sulfate B). Dermatan sulfate is a glycosaminoglycan with repeats consisting of beta-(1,4)-linked L-iduronyl-beta-(1,3)-N-acetyl-D-galactosamine 4-sulfate units." [GOC:ai]	17	950	6	18123	0.00631579	0.352941	Higher in GroupB	['GO:0006029']
GO:BP	GO:0051270	regulation of cellular component movement	0.406986	FALSE	"Any process that modulates the frequency, rate or extent of the movement of a cellular component." [GOC:ai, GOC:dph, GOC:jl]	1149	72	14	18123	0.194444	0.0121845	Higher in GroupD	['GO:0006928', 'GO:0032879', 'GO:0050794']
GO:BP	GO:0090200	positive regulation of release of cytochrome c from mitochondria	0.40769	FALSE	"Any process that increases the rate, frequency or extent of release of cytochrome c from mitochondria, the process in which cytochrome c is enabled to move from the mitochondrial intermembrane space into the cytosol, which is an early step in apoptosis and leads to caspase activation." [GOC:BHF, GOC:dph, GOC:mtg_apoptosis, GOC:tb]	28	2472	12	18123	0.00485437	0.428571	Higher in GroupD	['GO:0001836', 'GO:0010822', 'GO:0090199']
GO:BP	GO:0006991	response to sterol depletion	0.414074	FALSE	"Any process that results in a change in state or activity of a cell or an organism (in terms of movement, secretion, enzyme production, gene expression, etc.) as a result of a stimulus indicating deprivation of sterols. Sterols are a group of steroids characterized by the presence of one or more hydroxyl groups and a hydrocarbon side-chain in the molecule." [GOC:bf, ISBN:0198506732]	18	108	3	18123	0.0277778	0.166667	Higher in GroupB	['GO:0006950']
KEGG	KEGG:01040	Biosynthesis of unsaturated fatty acids	0.414097	FALSE	Biosynthesis of unsaturated fatty acids	27	90	3	8000	0.0333333	0.111111	Higher in GroupB	['KEGG:00000']
REAC	REAC:R-HSA-2980767	Activation of NIMA Kinases NEK9, NEK6, NEK7	0.414626	FALSE	Activation of NIMA Kinases NEK9, NEK6, NEK7	7	764	4	10622	0.0052356	0.571429	Higher in GroupB	['REAC:R-HSA-2980766']
GO:BP	GO:0008283	cell population proliferation	0.415002	FALSE	"The multiplication or reproduction of cells, resulting in the expansion of a cell population." [GOC:mah, GOC:mb]	2057	145	32	18123	0.22069	0.0155566	Higher in GroupB	['GO:0009987']
GO:BP	GO:0032970	regulation of actin filament-based process	0.415409	FALSE	"Any process that modulates the frequency, rate or extent of any cellular process that depends upon or alters the actin cytoskeleton." [GOC:mah]	404	977	40	18123	0.0409417	0.0990099	Higher in GroupB	['GO:0030029', 'GO:0050794']
GO:BP	GO:0040008	regulation of growth	0.419523	FALSE	"Any process that modulates the frequency, rate or extent of the growth of all or part of an organism so that it occurs at its proper speed, either globally or in a specific part of the organism's development." [GOC:ems, GOC:mah]	680	23	6	18123	0.26087	0.00882353	Higher in GroupB	['GO:0040007', 'GO:0050789']
GO:BP	GO:0060326	cell chemotaxis	0.420797	FALSE	"The directed movement of a motile cell guided by a specific chemical concentration gradient. Movement may be towards a higher concentration (positive chemotaxis) or towards a lower concentration (negative chemotaxis)." [GOC:dph]	310	2007	56	18123	0.0279023	0.180645	Higher in GroupD	['GO:0006935', 'GO:0016477', 'GO:0070887']
GO:BP	GO:0071222	cellular response to lipopolysaccharide	0.421703	FALSE	"Any process that results in a change in state or activity of a cell (in terms of movement, secretion, enzyme production, gene expression, etc.) as a result of a lipopolysaccharide stimulus; lipopolysaccharide is a major component of the cell wall of gram-negative bacteria." [GOC:mah]	202	2128	42	18123	0.0197368	0.207921	Higher in GroupD	['GO:0032496', 'GO:0071219', 'GO:0071396', 'GO:1901701']
KEGG	KEGG:04061	Viral protein interaction with cytokine and cytokine receptor	0.424048	FALSE	Viral protein interaction with cytokine and cytokine receptor	98	83	5	8000	0.060241	0.0510204	Higher in GroupD	['KEGG:00000']
GO:BP	GO:1905269	positive regulation of chromatin organization	0.424929	FALSE	"Any process that activates or increases the frequency, rate or extent of chromatin organization." [GO_REF:0000058, GOC:pr, GOC:TermGenie, GOC:vw, PMID:654321]	133	933	18	18123	0.0192926	0.135338	Higher in GroupB	['GO:0006325', 'GO:1902275', 'GO:2001252']
GO:BP	GO:0060392	negative regulation of SMAD protein signal transduction	0.436266	FALSE	"Any process that decreases the rate, frequency or extent of the SMAD protein signaling pathway. Pathway-restricted SMAD proteins and common-partner SMAD proteins are involved in the transforming growth factor beta receptor signaling pathways." [GOC:BHF, GOC:dph, GOC:tb]	7	872	4	18123	0.00458716	0.571429	Higher in GroupB	['GO:0060390', 'GO:0060395', 'GO:0090101']
GO:BP	GO:1903053	regulation of extracellular matrix organization	0.440812	FALSE	"Any process that modulates the frequency, rate or extent of extracellular matrix organization." [GO_REF:0000058, GOC:BHF, GOC:rl, GOC:TermGenie, PMID:22357537]	48	773	9	18123	0.0116429	0.1875	Higher in GroupB	['GO:0030198', 'GO:0051128']
GO:BP	GO:0071675	regulation of mononuclear cell migration	0.446143	FALSE	"Any process that modulates the rate, frequency or extent of mononuclear cell migration. Mononuclear cell migration is the movement of a mononuclear cell within or between different tissues and organs of the body." [GOC:mah]	114	2068	27	18123	0.0130561	0.236842	Higher in GroupD	['GO:0002685', 'GO:0071674']
GO:BP	GO:0006024	glycosaminoglycan biosynthetic process	0.451746	FALSE	"The chemical reactions and pathways resulting in the formation of glycosaminoglycans, any of a group of polysaccharides that contain amino sugars." [ISBN:0192800981]	107	1395	20	18123	0.0143369	0.186916	Higher in GroupB	['GO:0006023', 'GO:0030203']
GO:BP	GO:0044255	cellular lipid metabolic process	0.454646	FALSE	"The chemical reactions and pathways involving lipids, as carried out by individual cells." [GOC:jl]	1079	158	22	18123	0.139241	0.0203892	Higher in GroupB	['GO:0006629', 'GO:0044237']
GO:BP	GO:0006739	NADP metabolic process	0.456432	FALSE	"The chemical reactions and pathways involving nicotinamide-adenine dinucleotide phosphate, a coenzyme involved in many redox and biosynthetic reactions; metabolism may be of either the oxidized form, NADP, or the reduced form, NADPH." [GOC:mah]	36	267	5	18123	0.0187266	0.138889	Higher in GroupB	['GO:0008152']
REAC	REAC:R-HSA-201681	TCF dependent signaling in response to WNT	0.45923	FALSE	TCF dependent signaling in response to WNT	232	852	33	10622	0.0387324	0.142241	Higher in GroupB	['REAC:R-HSA-195721']
GO:BP	GO:1905114	cell surface receptor signaling pathway involved in cell-cell signaling	0.461241	FALSE	"Any cell surface receptor signaling pathway that is involved in cell-cell signaling." [GO_REF:0000060, GOC:TermGenie, ISBN:0-7167-3051-0]	639	1033	59	18123	0.0571152	0.0923318	Higher in GroupB	['GO:0007166', 'GO:0007267']
GO:BP	GO:1904814	regulation of protein localization to chromosome, telomeric region	0.470778	FALSE	"Any process that modulates the frequency, rate or extent of protein localization to chromosome, telomeric region." [GO_REF:0000058, GOC:BHF, GOC:BHF_telomere, GOC:nc, GOC:TermGenie, PMID:19487455]	15	1648	7	18123	0.00424757	0.466667	Higher in GroupD	['GO:0070198', 'GO:1903827']
GO:BP	GO:0045596	negative regulation of cell differentiation	0.472689	FALSE	"Any process that stops, prevents, or reduces the frequency, rate or extent of cell differentiation." [GOC:go_curators]	701	942	59	18123	0.0626327	0.0841655	Higher in GroupB	['GO:0030154', 'GO:0045595', 'GO:0048523', 'GO:0051093']
GO:BP	GO:0008544	epidermis development	0.473082	FALSE	"The process whose specific outcome is the progression of the epidermis over time, from its formation to the mature structure. The epidermis is the outer epithelial layer of an animal, it may be a single layer that produces an extracellular material (e.g. the cuticle of arthropods) or a complex stratified squamous epithelium, as in the case of many vertebrate species." [GOC:go_curators, UBERON:00…	478	76	9	18123	0.118421	0.0188285	Higher in GroupD	['GO:0009888']
GO:BP	GO:0006954	inflammatory response	0.481745	FALSE	"The immediate defensive reaction (by vertebrate tissue) to infection or injury caused by chemical or physical agents. The process is characterized by local vasodilation, extravasation of plasma into intercellular spaces and accumulation of white blood cells and macrophages." [GO_REF:0000022, ISBN:0198506732]	962	57	11	18123	0.192982	0.0114345	Higher in GroupD	['GO:0006952']
REAC	REAC:R-HSA-170834	Signaling by TGF-beta Receptor Complex	0.484862	FALSE	Signaling by TGF-beta Receptor Complex	71	821	14	10622	0.0170524	0.197183	Higher in GroupD	['REAC:R-HSA-9006936']
GO:BP	GO:0010536	positive regulation of activation of Janus kinase activity	0.484935	FALSE	"Any process that increases the frequency or rate of activation of JAK (Janus Activated Kinase) protein. The activation of JAK protein is the process of introducing a phosphate group to a tyrosine residue of a JAK (Janus Activated Kinase) protein, thereby activating it." [GOC:dph, GOC:tb, PMID:9135582]	7	53	2	18123	0.0377358	0.285714	Higher in GroupD	['GO:0010533', 'GO:0042976', 'GO:0045860', 'GO:0050731']
GO:BP	GO:1901137	carbohydrate derivative biosynthetic process	0.488077	FALSE	"The chemical reactions and pathways resulting in the formation of carbohydrate derivative." [GOC:TermGenie]	686	1725	94	18123	0.0544928	0.137026	Higher in GroupB	['GO:1901135', 'GO:1901576']
GO:BP	GO:0019216	regulation of lipid metabolic process	0.490441	FALSE	"Any process that modulates the frequency, rate or extent of the chemical reactions and pathways involving lipids." [GOC:go_curators]	391	209	14	18123	0.0669856	0.0358056	Higher in GroupB	['GO:0006629', 'GO:0080090']
KEGG	KEGG:04010	MAPK signaling pathway	0.491699	FALSE	MAPK signaling pathway	294	70	8	8000	0.114286	0.0272109	Higher in GroupD	['KEGG:00000']
GO:BP	GO:0022604	regulation of cell morphogenesis	0.497974	FALSE	"Any process that modulates the frequency, rate or extent of cell morphogenesis. Cell morphogenesis is the developmental process in which the shape of a cell is generated and organized." [GOC:isa_complete]	312	1279	40	18123	0.0312744	0.128205	Higher in GroupD	['GO:0000902', 'GO:0022603']
KEGG	KEGG:04215	Apoptosis - multiple species	0.498753	FALSE	Apoptosis - multiple species	32	1	1	8000	1	0.03125	Higher in GroupD	['KEGG:00000']
GO:BP	GO:0006664	glycolipid metabolic process	0.499294	FALSE	"The chemical reactions and pathways involving glycolipids, a class of 1,2-di-O-acylglycerols joined at oxygen 3 by a glycosidic linkage to a carbohydrate part (usually a mono-, di- or tri-saccharide). Some substances classified as bacterial glycolipids have the sugar group acylated by one or more fatty acids and the glycerol group may be absent." [ISBN:0198547684]	112	1447	21	18123	0.0145128	0.1875	Higher in GroupB	['GO:0006643', 'GO:1903509']
GO:BP	GO:0030335	positive regulation of cell migration	0.501431	FALSE	"Any process that activates or increases the frequency, rate or extent of cell migration." [GOC:go_curators]	568	162	15	18123	0.0925926	0.0264085	Higher in GroupD	['GO:0016477', 'GO:0030334', 'GO:2000147']
REAC	REAC:R-HSA-6803211	TP53 Regulates Transcription of Death Receptors and Ligands	0.503132	FALSE	TP53 Regulates Transcription of Death Receptors and Ligands	12	181	3	10622	0.0165746	0.25	Higher in GroupD	['REAC:R-HSA-5633008']
GO:BP	GO:0071674	mononuclear cell migration	0.506621	FALSE	"The movement of a mononuclear cell within or between different tissues and organs of the body." [GOC:mah]	193	1266	28	18123	0.0221169	0.145078	Higher in GroupD	['GO:0050900']
GO:BP	GO:1902041	regulation of extrinsic apoptotic signaling pathway via death domain receptors	0.509413	FALSE	"Any process that modulates the frequency, rate or extent of extrinsic apoptotic signaling pathway via death domain receptors." [GOC:TermGenie, PMID:17245429]	59	2242	18	18123	0.00802855	0.305085	Higher in GroupD	['GO:0008625', 'GO:2001236']
GO:BP	GO:0040007	growth	0.511854	FALSE	"The increase in size or mass of an entire organism, a part of an organism or a cell." [GOC:bf, GOC:ma]	973	24	7	18123	0.291667	0.00719424	Higher in GroupB	['GO:0008150']
KEGG	KEGG:04390	Hippo signaling pathway	0.513624	FALSE	Hippo signaling pathway	157	17	3	8000	0.176471	0.0191083	Higher in GroupD	['KEGG:00000']
GO:BP	GO:0035107	appendage morphogenesis	0.51392	FALSE	"The process in which the anatomical structures of appendages are generated and organized. An appendage is an organ or part that is attached to the trunk of an organism, such as a limb or a branch." [ISBN:0582227089]	141	1671	27	18123	0.016158	0.191489	Higher in GroupB	['GO:0009653', 'GO:0048736']
GO:BP	GO:0035108	limb morphogenesis	0.51392	FALSE	"The process in which the anatomical structures of a limb are generated and organized. A limb is a paired appendage of a tetrapod used for locomotion or grasping." [UBERON:0002101]	141	1671	27	18123	0.016158	0.191489	Higher in GroupB	['GO:0035107', 'GO:0060173']
GO:BP	GO:0043401	steroid hormone mediated signaling pathway	0.517671	FALSE	"A series of molecular signals mediated by a steroid hormone binding to a receptor." [PMID:12606724]	176	840	20	18123	0.0238095	0.113636	Higher in GroupB	['GO:0009755', 'GO:0071383']
REAC	REAC:R-HSA-1280215	Cytokine Signaling in Immune system	0.518045	FALSE	Cytokine Signaling in Immune system	696	13	5	10622	0.384615	0.00718391	Higher in GroupD	['REAC:R-HSA-168256']
GO:BP	GO:0043122	regulation of I-kappaB kinase/NF-kappaB signaling	0.526503	FALSE	"Any process that modulates I-kappaB kinase/NF-kappaB signaling." [GOC:jl, PMID:12773372]	250	2	2	18123	1	0.008	Higher in GroupD	['GO:0007249', 'GO:1902531']
REAC	REAC:R-HSA-3906995	Diseases associated with O-glycosylation of proteins	0.536299	FALSE	Diseases associated with O-glycosylation of proteins	65	8	2	10622	0.25	0.0307692	Higher in GroupB	['REAC:R-HSA-3781865']
GO:BP	GO:0006066	alcohol metabolic process	0.540298	FALSE	"The chemical reactions and pathways involving alcohols, any of a class of compounds containing one or more hydroxyl groups attached to a saturated carbon atom." [ISBN:0198506732]	381	477	23	18123	0.048218	0.0603675	Higher in GroupB	['GO:0044281', 'GO:1901615']
GO:BP	GO:0090311	regulation of protein deacetylation	0.540971	FALSE	"Any process that modulates the rate, frequency, or extent of protein deacetylation, the removal of an acetyl group from a protein amino acid. An acetyl group is CH3CO-, derived from acetic [ethanoic] acid." [GOC:tb]	49	108	4	18123	0.037037	0.0816327	Higher in GroupB	['GO:0006476', 'GO:0031399']
GO:BP	GO:0009125	nucleoside monophosphate catabolic process	0.546378	FALSE	"The chemical reactions and pathways resulting in the breakdown of a nucleoside monophosphate, a compound consisting of a nucleobase linked to a deoxyribose or ribose sugar esterified with phosphate on the sugar." [GOC:go_curators, ISBN:0198506732]	17	1981	8	18123	0.00403836	0.470588	Higher in GroupD	['GO:0009123', 'GO:1901292']
GO:BP	GO:0071621	granulocyte chemotaxis	0.561331	FALSE	"The movement of a granulocyte in response to an external stimulus." [GOC:rph]	125	2007	28	18123	0.0139512	0.224	Higher in GroupD	['GO:0030595', 'GO:0097530']
GO:BP	GO:0042531	positive regulation of tyrosine phosphorylation of STAT protein	0.562866	FALSE	"Any process that activates or increases the frequency, rate or extent of the introduction of a phosphate group to a tyrosine residue of a STAT (Signal Transducer and Activator of Transcription) protein." [GOC:jl, PMID:11426647]	73	72	4	18123	0.0555556	0.0547945	Higher in GroupD	['GO:0007260', 'GO:0042509', 'GO:0050731']
GO:BP	GO:1903509	liposaccharide metabolic process	0.56792	FALSE	"The chemical reactions and pathways involving liposaccharide." [GO_REF:0000068, GOC:dph, GOC:TermGenie, PMID:9452964]	113	1447	21	18123	0.0145128	0.185841	Higher in GroupB	['GO:0006629', 'GO:1901135']
REAC	REAC:R-HSA-9664424	Cell recruitment (pro-inflammatory response)	0.569391	FALSE	Cell recruitment (pro-inflammatory response)	24	995	8	10622	0.0080402	0.333333	Higher in GroupD	['REAC:R-HSA-9658195']
REAC	REAC:R-HSA-9660826	Purinergic signaling in leishmaniasis infection	0.569391	FALSE	Purinergic signaling in leishmaniasis infection	24	995	8	10622	0.0080402	0.333333	Higher in GroupD	['REAC:R-HSA-9664424']
GO:BP	GO:0033092	positive regulation of immature T cell proliferation in thymus	0.56963	FALSE	"Any process that activates or increases the frequency, rate or extent of immature T cell proliferation in the thymus." [GOC:add, GOC:mah]	5	504	3	18123	0.00595238	0.6	Higher in GroupD	['GO:0033080', 'GO:0033084', 'GO:0033091']
GO:BP	GO:0031065	positive regulation of histone deacetylation	0.573487	FALSE	"Any process that activates or increases the frequency, rate or extent of the removal of acetyl groups from histones." [GOC:mah]	20	108	3	18123	0.0277778	0.15	Higher in GroupB	['GO:0016575', 'GO:0031058', 'GO:0031063', 'GO:0090312']
GO:BP	GO:0009605	response to external stimulus	0.575217	FALSE	"Any process that results in a change in state or activity of a cell or an organism (in terms of movement, secretion, enzyme production, gene expression, etc.) as a result of an external stimulus." [GOC:hb]	3114	206	56	18123	0.271845	0.0179833	Higher in GroupD	['GO:0050896']
GO:BP	GO:0030029	actin filament-based process	0.577436	FALSE	"Any cellular process that depends upon or alters the actin cytoskeleton, that part of the cytoskeleton comprising actin filaments and their associated proteins." [GOC:mah]	810	1019	70	18123	0.0686948	0.0864198	Higher in GroupB	['GO:0009987']
GO:BP	GO:0030336	negative regulation of cell migration	0.578544	FALSE	"Any process that stops, prevents, or reduces the frequency, rate or extent of cell migration." [GOC:go_curators]	360	151	11	18123	0.0728477	0.0305556	Higher in GroupB	['GO:0016477', 'GO:0030334', 'GO:2000146']
GO:BP	GO:0021836	chemorepulsion involved in postnatal olfactory bulb interneuron migration	0.58081	FALSE	"The creation and reception of signals that repel olfactory bulb interneurons from the subventricular zone as a component process in tangential migration." [GO_REF:0000021, GOC:cls, GOC:dgh, GOC:dph, GOC:jid, PMID:12626695]	2	2	1	18123	0.5	0.5	Higher in GroupB	['GO:0021827', 'GO:0050919']
GO:BP	GO:0021966	corticospinal neuron axon guidance	0.58081	FALSE	"The process in which the migration of an axon growth cone of a neuron that is part of the corticospinal tract is directed from the cerebral cortex layer V to the spinal cord dorsal funiculus in response to a combination of attractive and repulsive cues." [GO_REF:0000021, GOC:cls, GOC:dgh, GOC:dph, GOC:jid, PMID:9878731]	2	2	1	18123	0.5	0.5	Higher in GroupB	['GO:0007411', 'GO:0021957']
GO:BP	GO:0021823	cerebral cortex tangential migration using cell-cell interactions	0.58081	FALSE	"The process in which neurons interact with each other to promote migration along a tangential plane." [GO_REF:0000021, GOC:cls, GOC:dgh, GOC:dph, GOC:jid, PMID:12626695]	2	2	1	18123	0.5	0.5	Higher in GroupB	['GO:0021825']
GO:BP	GO:1902668	negative regulation of axon guidance	0.58081	FALSE	"Any process that stops, prevents or reduces the frequency, rate or extent of axon guidance." [GO_REF:0000058, GOC:hjd, GOC:TermGenie, PMID:23006775]	2	2	1	18123	0.5	0.5	Higher in GroupB	['GO:0007411', 'GO:0050922', 'GO:0051271', 'GO:1902667']
GO:BP	GO:0021827	postnatal olfactory bulb interneuron migration	0.58081	FALSE	"The migration of olfactory bulb interneuron precursors in the cerebral cortex that occurs after birth." [GO_REF:0000021, GOC:cls, GOC:dgh, GOC:dph, GOC:jid, PMID:12626695]	2	2	1	18123	0.5	0.5	Higher in GroupB	['GO:0021823', 'GO:0021891', 'GO:0022028']
GO:BP	GO:0090260	negative regulation of retinal ganglion cell axon guidance	0.58081	FALSE	"Any process that decreases the frequency, rate, or extent of retinal ganglion cell axon guidance, the process in which the migration of an axon growth cone of a retinal ganglion cell (RGC) is directed to its target in the brain in response to a combination of attractive and repulsive cues." [GOC:tb, GOC:yaf]	2	2	1	18123	0.5	0.5	Higher in GroupB	['GO:0031290', 'GO:0090259', 'GO:1902668']
GO:BP	GO:0021825	substrate-dependent cerebral cortex tangential migration	0.58081	FALSE	"The process where neuronal precursors migrate tangentially in the cerebral cortex, primarily guided through physical cell-cell interactions." [GO_REF:0000021, GOC:cls, GOC:dgh, GOC:dph, GOC:jid]	2	2	1	18123	0.5	0.5	Higher in GroupB	['GO:0006929', 'GO:0021800']
REAC	REAC:R-HSA-5676590	NIK-->noncanonical NF-kB signaling	0.592741	FALSE	NIK-->noncanonical NF-kB signaling	59	2076	22	10622	0.0105973	0.372881	Higher in GroupD	['REAC:R-HSA-5668541']
GO:BP	GO:0071356	cellular response to tumor necrosis factor	0.59512	FALSE	"Any process that results in a change in state or activity of a cell (in terms of movement, secretion, enzyme production, gene expression, etc.) as a result of a tumor necrosis factor stimulus." [GOC:mah]	308	1858	52	18123	0.0279871	0.168831	Higher in GroupD	['GO:0034612', 'GO:0071345']
GO:BP	GO:0051241	negative regulation of multicellular organismal process	0.597841	FALSE	"Any process that stops, prevents, or reduces the frequency, rate or extent of an organismal process, the processes pertinent to the function of an organism above the cellular level; includes the integrated processes of tissues and organs." [GOC:ai]	1174	221	29	18123	0.131222	0.0247019	Higher in GroupB	['GO:0032501', 'GO:0048519', 'GO:0051239']
GO:BP	GO:0019221	cytokine-mediated signaling pathway	0.599078	FALSE	"A series of molecular signals initiated by the binding of a cytokine to a receptor on the surface of a cell, and ending with regulation of a downstream cellular process, e.g. transcription." [GOC:mah, GOC:signaling, PMID:19295629]	824	2007	124	18123	0.0617838	0.150485	Higher in GroupD	['GO:0007166', 'GO:0071345']
GO:BP	GO:0070372	regulation of ERK1 and ERK2 cascade	0.600325	FALSE	"Any process that modulates the frequency, rate or extent of signal transduction mediated by the ERK1 and ERK2 cascade." [GOC:add, ISBN:0121245462, ISBN:0896039986]	310	1211	38	18123	0.031379	0.122581	Higher in GroupD	['GO:0043408', 'GO:0070371']
GO:BP	GO:0032376	positive regulation of cholesterol transport	0.602555	FALSE	"Any process that activates or increases the frequency, rate or extent of the directed movement of cholesterol into, out of or within a cell, or between cells, by means of some agent such as a transporter or pore." [GOC:mah]	34	476	6	18123	0.012605	0.176471	Higher in GroupB	['GO:0030301', 'GO:0032373', 'GO:0032374']
GO:BP	GO:0032373	positive regulation of sterol transport	0.602555	FALSE	"Any process that activates or increases the frequency, rate or extent of the directed movement of sterols into, out of or within a cell, or between cells, by means of some agent such as a transporter or pore." [GOC:mah]	34	476	6	18123	0.012605	0.176471	Higher in GroupB	['GO:0015918', 'GO:0032370', 'GO:0032371']
GO:BP	GO:0030162	regulation of proteolysis	0.621766	FALSE	"Any process that modulates the frequency, rate or extent of the hydrolysis of a peptide bond or bonds within a protein." [GOC:mah]	756	243	23	18123	0.0946502	0.0304233	Higher in GroupD	['GO:0006508', 'GO:0051246']
GO:BP	GO:0060325	face morphogenesis	0.622459	FALSE	"The process in which the anatomical structures of the face are generated and organized. The face is the ventral division of the head." [GOC:dph]	30	542	6	18123	0.0110701	0.2	Higher in GroupD	['GO:0009653', 'GO:0060323', 'GO:0060324']
REAC	REAC:R-HSA-9020702	Interleukin-1 signaling	0.625082	FALSE	Interleukin-1 signaling	101	2076	33	10622	0.015896	0.326733	Higher in GroupD	['REAC:R-HSA-446652']
REAC	REAC:R-HSA-75105	Fatty acyl-CoA biosynthesis	0.633293	FALSE	Fatty acyl-CoA biosynthesis	37	135	4	10622	0.0296296	0.108108	Higher in GroupB	['REAC:R-HSA-8978868']
REAC	REAC:R-HSA-5675482	Regulation of necroptotic cell death	0.638244	FALSE	Regulation of necroptotic cell death	28	181	4	10622	0.0220994	0.142857	Higher in GroupD	['REAC:R-HSA-5213460']
REAC	REAC:R-HSA-5213460	RIPK1-mediated regulated necrosis	0.638244	FALSE	RIPK1-mediated regulated necrosis	28	181	4	10622	0.0220994	0.142857	Higher in GroupD	['REAC:R-HSA-5218859']
REAC	REAC:R-HSA-5218859	Regulated Necrosis	0.638244	FALSE	Regulated Necrosis	28	181	4	10622	0.0220994	0.142857	Higher in GroupD	['REAC:R-HSA-5357801']
GO:BP	GO:0043410	positive regulation of MAPK cascade	0.638253	FALSE	"Any process that activates or increases the frequency, rate or extent of signal transduction mediated by the MAPK cascade." [GOC:go_curators]	542	70	9	18123	0.128571	0.0166052	Higher in GroupD	['GO:0000165', 'GO:0043408', 'GO:1902533']
GO:BP	GO:0036388	pre-replicative complex assembly	0.645202	FALSE	"The aggregation, arrangement and bonding together of a set of components to form the pre-replicative complex, a protein-DNA complex that forms at the origin of replication during the initial step of DNA replication and allows the origin to become competent, or 'licensed', for replication." [GOC:bf, GOC:bhm, GOC:jh2]	66	2399	20	18123	0.00833681	0.30303	Higher in GroupD	['GO:0006261', 'GO:0065004']
GO:BP	GO:0031669	cellular response to nutrient levels	0.646557	FALSE	"Any process that results in a change in state or activity of a cell (in terms of movement, secretion, enzyme production, gene expression, etc.) as a result of a stimulus reflecting the presence, absence, or concentration of nutrients." [GOC:mah]	250	785	24	18123	0.0305732	0.096	Higher in GroupD	['GO:0031667', 'GO:0031668']
GO:BP	GO:0006342	chromatin silencing	0.650588	FALSE	"Repression of transcription by altering the structure of chromatin, e.g. by conversion of large regions of DNA into an inaccessible state often called heterochromatin." [GOC:mah, PMID:10219245]	75	1157	14	18123	0.0121003	0.186667	Higher in GroupB	['GO:0016458', 'GO:0045814', 'GO:0045892', 'GO:0097549']
GO:BP	GO:0060396	growth hormone receptor signaling pathway	0.65161	FALSE	"The series of molecular signals generated as a consequence of growth hormone receptor binding to its physiological ligand." [GOC:BHF, GOC:dph, PMID:11445442]	26	16	2	18123	0.125	0.0769231	Higher in GroupD	['GO:0007169', 'GO:0071378']
GO:BP	GO:0007165	signal transduction	0.652974	FALSE	"The cellular process in which a signal is conveyed to trigger a change in the activity or state of a cell. Signal transduction begins with reception of a signal (e.g. a ligand binding to a receptor or receptor activation by a stimulus such as light), or for signal transduction in the absence of ligand, signal-withdrawal or the activity of a constitutively active receptor. Signal transduction end…	6447	75	42	18123	0.56	0.00651466	Higher in GroupD	['GO:0007154', 'GO:0009987', 'GO:0023052', 'GO:0050794', 'GO:0051716']
GO:BP	GO:0030578	PML body organization	0.656083	FALSE	"A process that is carried out at the cellular level which results in the assembly, arrangement of constituent parts, or disassembly of PML bodies, a class of nuclear body; they react against SP100 auto-antibodies (PML = promyelocytic leukemia)." [GOC:mah, PMID:10806078]	5	89	2	18123	0.0224719	0.4	Higher in GroupD	['GO:0030575']
GO:BP	GO:0002016	regulation of blood volume by renin-angiotensin	0.658584	FALSE	"The process in which the renin-angiotensin system controls the rate of fluid intake and output into the blood." [GOC:dph, GOC:mtg_cardio, GOC:tb, ISBN:0721643949]	8	55	2	18123	0.0363636	0.25	Higher in GroupB	['GO:0003081']
GO:BP	GO:0046634	regulation of alpha-beta T cell activation	0.659688	FALSE	"Any process that modulates the frequency, rate or extent of alpha-beta T cell activation." [GOC:ai]	104	362	9	18123	0.0248619	0.0865385	Higher in GroupD	['GO:0046631', 'GO:0050863']
GO:BP	GO:0035710	CD4-positive, alpha-beta T cell activation	0.659688	FALSE	"The change in morphology and behavior of a CD4-positive, alpha-beta T cell resulting from exposure to a mitogen, cytokine, chemokine, cellular ligand, or an antigen for which it is specific." [CL:0000624, GOC:BHF]	104	362	9	18123	0.0248619	0.0865385	Higher in GroupD	['GO:0046631']
GO:BP	GO:0050673	epithelial cell proliferation	0.663053	FALSE	"The multiplication or reproduction of epithelial cells, resulting in the expansion of a cell population. Epithelial cells make up the epithelium, the covering of internal and external surfaces of the body, including the lining of vessels and other small cavities. It consists of cells joined by small amounts of cementing substances." [ISBN:0721662544]	460	83	9	18123	0.108434	0.0195652	Higher in GroupB	['GO:0008283']
GO:BP	GO:0033628	regulation of cell adhesion mediated by integrin	0.666264	FALSE	"Any process that modulates the frequency, rate, or extent of cell adhesion mediated by integrin." [GOC:add]	48	1201	11	18123	0.00915903	0.229167	Higher in GroupD	['GO:0030155', 'GO:0033627']
GO:BP	GO:0009267	cellular response to starvation	0.668396	FALSE	"Any process that results in a change in state or activity of a cell (in terms of movement, secretion, enzyme production, gene expression, etc.) as a result of deprivation of nourishment." [GOC:jl]	191	549	16	18123	0.0291439	0.0837696	Higher in GroupD	['GO:0031669', 'GO:0033554', 'GO:0042594']
GO:BP	GO:0000819	sister chromatid segregation	0.672152	FALSE	"The cell cycle process in which sister chromatids are organized and then physically separated and apportioned to two or more sets." [GOC:ai, GOC:elh]	214	2052	42	18123	0.0204678	0.196262	Higher in GroupB	['GO:0051276', 'GO:0098813']
GO:BP	GO:0051216	cartilage development	0.674249	FALSE	"The process whose specific outcome is the progression of a cartilage element over time, from its formation to the mature structure. Cartilage elements are skeletal elements that consist of connective tissue dominated by extracellular matrix containing collagen type II and large amounts of proteoglycan, particularly chondroitin sulfate." [GOC:cjm, PMID:23251424]	194	2573	46	18123	0.017878	0.237113	Higher in GroupB	['GO:0001501', 'GO:0048513', 'GO:0061448']
GO:BP	GO:0006338	chromatin remodeling	0.680408	FALSE	"Dynamic structural changes to eukaryotic chromatin occurring throughout the cell division cycle. These changes range from the local changes necessary for transcriptional regulation to global changes necessary for chromosome segregation." [GOC:jid, GOC:vw, PMID:12697820]	222	783	22	18123	0.0280971	0.0990991	Higher in GroupB	['GO:0006325']
GO:BP	GO:0002063	chondrocyte development	0.680849	FALSE	"The process whose specific outcome is the progression of a chondrocyte over time, from its commitment to its mature state. Chondrocyte development does not include the steps involved in committing a chondroblast to a chondrocyte fate." [GOC:dph]	30	74	3	18123	0.0405405	0.1	Higher in GroupD	['GO:0002062', 'GO:0048468']
GO:BP	GO:2000377	regulation of reactive oxygen species metabolic process	0.681288	FALSE	"Any process that modulates the frequency, rate or extent of reactive oxygen species metabolic process." [GOC:mah]	155	15	3	18123	0.2	0.0193548	Higher in GroupB	['GO:0031323', 'GO:0072593']
GO:BP	GO:0010747	positive regulation of long-chain fatty acid import across plasma membrane	0.68458	FALSE	"Any process that increases the rate, frequency or extent of plasma membrane long-chain fatty acid transport. Plasma membrane long-chain fatty acid transport is the directed movement of long-chain fatty acids across the plasma membrane. A long-chain fatty acid is a fatty acid with a chain length between C13 and C22." [GOC:BHF, GOC:dph, GOC:tb]	2	285	2	18123	0.00701754	1	Higher in GroupD	['GO:0010746', 'GO:0015911', 'GO:0034764', 'GO:0140214']
GO:BP	GO:0072539	T-helper 17 cell differentiation	0.687465	FALSE	"The process in which a relatively unspecialized T cell acquires the specialized features of a T-helper 17 (Th17) cell. A Th17 cell is a CD4-positive, alpha-beta T cell with the phenotype RORgamma-t-positive that produces IL-17." [CL:0000899, GOC:BHF, GOC:ebc]	29	362	5	18123	0.0138122	0.172414	Higher in GroupD	['GO:0042093', 'GO:0072538']
GO:BP	GO:0051603	proteolysis involved in cellular protein catabolic process	0.690073	FALSE	"The hydrolysis of a peptide bond or bonds within a protein as part of the chemical reactions and pathways resulting in the breakdown of a protein by individual cells." [GOC:ai, GOC:dph, GOC:tb]	760	1629	97	18123	0.0595457	0.127632	Higher in GroupD	['GO:0006508', 'GO:0044257']
GO:BP	GO:0046165	alcohol biosynthetic process	0.691836	FALSE	"The chemical reactions and pathways resulting in the formation of alcohols, any of a class of compounds containing one or more hydroxyl groups attached to a saturated carbon atom." [GOC:ai]	148	439	12	18123	0.0273349	0.0810811	Higher in GroupB	['GO:0006066', 'GO:0044283', 'GO:1901617']
GO:BP	GO:0090322	regulation of superoxide metabolic process	0.692219	FALSE	"Any process that modulates the rate, frequency, or extent of superoxide metabolism, the chemical reactions and pathways involving superoxide, the superoxide anion O2- (superoxide free radical), or any compound containing this species." [GOC:tb]	34	13	2	18123	0.153846	0.0588235	Higher in GroupB	['GO:0006801', 'GO:2000377']
KEGG	KEGG:04216	Ferroptosis	0.693495	FALSE	Ferroptosis	41	22	2	8000	0.0909091	0.0487805	Higher in GroupB	['KEGG:00000']
GO:BP	GO:0090502	RNA phosphodiester bond hydrolysis, endonucleolytic	0.70797	FALSE	"The chemical reactions and pathways involving the hydrolysis of internal 3',5'-phosphodiester bonds in one or two strands of ribonucleotides." [GOC:dph, GOC:tb]	81	372	8	18123	0.0215054	0.0987654	Higher in GroupD	['GO:0090501']
GO:BP	GO:0007249	I-kappaB kinase/NF-kappaB signaling	0.708855	FALSE	"The process in which a signal is passed on to downstream components within the cell through the I-kappaB-kinase (IKK)-dependent activation of NF-kappaB. The cascade begins with activation of a trimeric IKK complex (consisting of catalytic kinase subunits IKKalpha and/or IKKbeta, and the regulatory scaffold protein NEMO) and ends with the regulation of transcription of target genes by NF-kappaB. …	290	2	2	18123	1	0.00689655	Higher in GroupD	['GO:0035556']
GO:BP	GO:0045926	negative regulation of growth	0.711904	FALSE	"Any process that stops, prevents or reduces the rate or extent of growth, the increase in size or mass of all or part of an organism." [GOC:go_curators]	254	23	4	18123	0.173913	0.015748	Higher in GroupB	['GO:0040007', 'GO:0040008', 'GO:0048519']
GO:BP	GO:1902099	regulation of metaphase/anaphase transition of cell cycle	0.716258	FALSE	"Any process that modulates the frequency, rate or extent of metaphase/anaphase transition of cell cycle." [GOC:mtg_cell_cycle, GOC:TermGenie]	62	1256	13	18123	0.0103503	0.209677	Higher in GroupB	['GO:0033045', 'GO:0044784', 'GO:1901987']
GO:BP	GO:0071480	cellular response to gamma radiation	0.722226	FALSE	"Any process that results in a change in state or activity of a cell (in terms of movement, secretion, enzyme production, gene expression, etc.) as a result of a gamma radiation stimulus. Gamma radiation is a form of electromagnetic radiation (EMR) or light emission of a specific frequency produced from sub-atomic particle interaction, such as electron-positron annihilation and radioactive decay.…	30	15	2	18123	0.133333	0.0666667	Higher in GroupB	['GO:0010332', 'GO:0071479']
GO:BP	GO:0036462	TRAIL-activated apoptotic signaling pathway	0.723102	FALSE	"An extrinsic apoptotic signaling pathway initiated by the binding of the ligand TRAIL (tumor necrosis factor-related apoptosis-inducing ligand) to a death receptor on the cell surface." [GOC:bf, GOC:PARL, PMID:21785459]	13	181	3	18123	0.0165746	0.230769	Higher in GroupD	['GO:0008625']
GO:BP	GO:0055091	phospholipid homeostasis	0.723965	FALSE	"Any process involved in the maintenance of an internal steady state of phospholipid within an organism or cell." [GOC:BHF, GOC:rl]	16	377	4	18123	0.0106101	0.25	Higher in GroupB	['GO:0055088']
GO:BP	GO:0048585	negative regulation of response to stimulus	0.725486	FALSE	"Any process that stops, prevents, or reduces the frequency, rate or extent of a response to a stimulus. Response to stimulus is a change in state or activity of a cell or an organism (in terms of movement, secretion, enzyme production, gene expression, etc.) as a result of a stimulus." [GOC:jid]	1938	75	19	18123	0.253333	0.00980392	Higher in GroupD	['GO:0048519', 'GO:0048583', 'GO:0050896']
KEGG	KEGG:04640	Hematopoietic cell lineage	0.735886	FALSE	Hematopoietic cell lineage	95	10	2	8000	0.2	0.0210526	Higher in GroupD	['KEGG:00000']
GO:BP	GO:0007166	cell surface receptor signaling pathway	0.738727	FALSE	"A series of molecular signals initiated by activation of a receptor on the surface of a cell. The pathway begins with binding of an extracellular ligand to a cell surface receptor, or for receptors that signal in the absence of a ligand, by ligand-withdrawal or the activity of a constitutively active receptor. The pathway ends with regulation of a downstream cellular process, e.g. transcription.…	3226	102	33	18123	0.323529	0.0102294	Higher in GroupD	['GO:0007165']
GO:BP	GO:2000501	regulation of natural killer cell chemotaxis	0.746805	FALSE	"Any process that modulates the frequency, rate or extent of natural killer cell chemotaxis." [GOC:BHF]	8	57	2	18123	0.0350877	0.25	Higher in GroupD	['GO:0035747', 'GO:1901623']
GO:BP	GO:0048771	tissue remodeling	0.749691	FALSE	"The reorganization or renovation of existing tissues. This process can either change the characteristics of a tissue such as in blood vessel remodeling, or result in the dynamic equilibrium of a tissue such as in bone remodeling." [GOC:ebc]	187	205	9	18123	0.0439024	0.0481283	Higher in GroupB	['GO:0032501']
GO:BP	GO:1901003	negative regulation of fermentation	0.750311	FALSE	"Any process that stops, prevents or reduces the frequency, rate or extent of fermentation." [GOC:TermGenie]	4	126	2	18123	0.015873	0.5	Higher in GroupB	['GO:0006113', 'GO:0031324', 'GO:0043465']
GO:BP	GO:0071378	cellular response to growth hormone stimulus	0.757092	FALSE	"Any process that results in a change in state or activity of a cell (in terms of movement, secretion, enzyme production, gene expression, etc.) as a result of a growth hormone stimulus. Growth hormone is a peptide hormone that binds to the growth hormone receptor and stimulates growth." [GOC:mah]	28	16	2	18123	0.125	0.0714286	Higher in GroupD	['GO:0060416', 'GO:0071375']
GO:BP	GO:0030099	myeloid cell differentiation	0.757948	FALSE	"The process in which a relatively unspecialized myeloid precursor cell acquires the specialized features of any cell of the myeloid leukocyte, megakaryocyte, thrombocyte, or erythrocyte lineages." [GOC:add, ISBN:0781735149]	436	1414	55	18123	0.0388967	0.126147	Higher in GroupD	['GO:0030097', 'GO:0030154']
GO:BP	GO:0032434	regulation of proteasomal ubiquitin-dependent protein catabolic process	0.758913	FALSE	"Any process that modulates the frequency, rate or extent of the breakdown of a protein or peptide by hydrolysis of its peptide bonds, initiated by the covalent attachment of ubiquitin, and mediated by the proteasome." [GOC:mah]	135	1593	25	18123	0.0156937	0.185185	Higher in GroupD	['GO:0043161', 'GO:0061136', 'GO:2000058']
GO:BP	GO:0009057	macromolecule catabolic process	0.762751	FALSE	"The chemical reactions and pathways resulting in the breakdown of a macromolecule, any molecule of high relative molecular mass, the structure of which essentially comprises the multiple repetition of units derived, actually or conceptually, from molecules of low relative molecular mass." [GOC:mah]	1479	1143	126	18123	0.110236	0.0851927	Higher in GroupD	['GO:0043170', 'GO:1901575']
KEGG	KEGG:05165	Human papillomavirus infection	0.767768	FALSE	Human papillomavirus infection	331	29	5	8000	0.172414	0.0151057	Higher in GroupD	['KEGG:00000']
GO:BP	GO:1901701	cellular response to oxygen-containing compound	0.76955	FALSE	"Any process that results in a change in state or activity of a cell (in terms of movement, secretion, enzyme production, gene expression, etc.) as a result of an oxygen-containing compound stimulus." [GOC:pr, GOC:TermGenie]	1237	15	6	18123	0.4	0.00485044	Higher in GroupB	['GO:0070887', 'GO:1901700']
GO:BP	GO:0030155	regulation of cell adhesion	0.769666	FALSE	"Any process that modulates the frequency, rate or extent of attachment of a cell to another cell or to the extracellular matrix." [GOC:mah]	756	1279	79	18123	0.061767	0.104497	Higher in GroupD	['GO:0007155', 'GO:0050794']
GO:BP	GO:0046425	regulation of receptor signaling pathway via JAK-STAT	0.774895	FALSE	"Any process that modulates the frequency, rate or extent of receptor signaling via JAK-STAT." [GOC:bf]	108	53	4	18123	0.0754717	0.037037	Higher in GroupD	['GO:0007259', 'GO:1904892']
GO:BP	GO:0048584	positive regulation of response to stimulus	0.776878	FALSE	"Any process that activates, maintains or increases the rate of a response to a stimulus. Response to stimulus is a change in state or activity of a cell or an organism (in terms of movement, secretion, enzyme production, gene expression, etc.) as a result of a stimulus." [GOC:jid]	2368	12	7	18123	0.583333	0.00295608	Higher in GroupD	['GO:0048518', 'GO:0048583', 'GO:0050896']
GO:BP	GO:0006633	fatty acid biosynthetic process	0.779203	FALSE	"The chemical reactions and pathways resulting in the formation of a fatty acid, any of the aliphatic monocarboxylic acids that can be liberated by hydrolysis from naturally occurring fats and oils. Fatty acids are predominantly straight-chain acids of 4 to 24 carbon atoms, which may be saturated or unsaturated; branched fatty acids and hydroxy fatty acids also occur, and very long chain acids of…	171	135	7	18123	0.0518519	0.0409357	Higher in GroupB	['GO:0006631', 'GO:0008610', 'GO:0072330']
GO:BP	GO:2000147	positive regulation of cell motility	0.781577	FALSE	"Any process that activates or increases the frequency, rate or extent of cell motility." [GOC:mah]	592	162	15	18123	0.0925926	0.0253378	Higher in GroupD	['GO:0040017', 'GO:0048870', 'GO:0051272', 'GO:2000145']
GO:BP	GO:0048736	appendage development	0.781826	FALSE	"The process whose specific outcome is the progression of an appendage over time, from its formation to the mature structure. An appendage is an organ or part that is attached to the trunk of an organism, such as a limb or a branch." [GOC:jid, GOC:rc]	175	1671	31	18123	0.0185518	0.177143	Higher in GroupB	['GO:0007275', 'GO:0048856']
GO:BP	GO:0060173	limb development	0.781826	FALSE	"The process whose specific outcome is the progression of a limb over time, from its formation to the mature structure. A limb is an appendage of an animal used for locomotion or grasping. Examples include legs, arms or some types of fin." [GOC:dgh, GOC:dph, PMID:11487378]	175	1671	31	18123	0.0185518	0.177143	Higher in GroupB	['GO:0048736']
GO:BP	GO:0032436	positive regulation of proteasomal ubiquitin-dependent protein catabolic process	0.7884	FALSE	"Any process that activates or increases the frequency, rate or extent of the breakdown of a protein or peptide by hydrolysis of its peptide bonds, initiated by the covalent attachment of ubiquitin, and mediated by the proteasome." [GOC:mah]	92	177	6	18123	0.0338983	0.0652174	Higher in GroupD	['GO:0032434', 'GO:0043161', 'GO:1901800', 'GO:2000060']
GO:BP	GO:0040015	negative regulation of multicellular organism growth	0.790504	FALSE	"Any process that stops, prevents, or reduces the frequency, rate or extent of growth of an organism to reach its usual body size." [GOC:dph, GOC:ems, GOC:tb]	11	42	2	18123	0.047619	0.181818	Higher in GroupD	['GO:0035264', 'GO:0040014', 'GO:0048640', 'GO:0051241']
GO:BP	GO:0070647	protein modification by small protein conjugation or removal	0.79051	FALSE	"A protein modification process in which one or more groups of a small protein, such as ubiquitin or a ubiquitin-like protein, are covalently attached to or removed from a target protein." [GOC:mah]	1193	3	3	18123	1	0.00251467	Higher in GroupD	['GO:0006464']
GO:BP	GO:0009755	hormone-mediated signaling pathway	0.792399	FALSE	"A series of molecular signals mediated by the detection of a hormone." [GOC:sm]	238	840	24	18123	0.0285714	0.10084	Higher in GroupB	['GO:0007165', 'GO:0032870']
REAC	REAC:R-HSA-5676594	TNF receptor superfamily (TNFSF) members mediating non-canonical NF-kB pathway	0.792794	FALSE	TNF receptor superfamily (TNFSF) members mediating non-canonical NF-kB pathway	16	1	1	10622	1	0.0625	Higher in GroupD	['REAC:R-HSA-5668541']
GO:BP	GO:0071670	smooth muscle cell chemotaxis	0.79814	FALSE	"The directed movement of a smooth muscle cell in response to an external stimulus." [GOC:mah]	10	1261	5	18123	0.00396511	0.5	Higher in GroupB	['GO:0014909', 'GO:0060326']
GO:BP	GO:0045667	regulation of osteoblast differentiation	0.800125	FALSE	"Any process that modulates the frequency, rate or extent of osteoblast differentiation." [GOC:go_curators]	135	419	11	18123	0.026253	0.0814815	Higher in GroupB	['GO:0001649', 'GO:0045595']
REAC	REAC:R-HSA-428890	Role of ABL in ROBO-SLIT signaling	0.800963	FALSE	Role of ABL in ROBO-SLIT signaling	8	2	1	10622	0.5	0.125	Higher in GroupB	['REAC:R-HSA-376176']
REAC	REAC:R-HSA-428543	Inactivation of CDC42 and RAC1	0.800963	FALSE	Inactivation of CDC42 and RAC1	8	2	1	10622	0.5	0.125	Higher in GroupB	['REAC:R-HSA-376176']
GO:BP	GO:0001503	ossification	0.803594	FALSE	"The formation of bone or of a bony substance, or the conversion of fibrous tissue or of cartilage into bone or a bony substance." [GOC:mtg_mpo, PMID:17572649]	418	942	39	18123	0.0414013	0.0933014	Higher in GroupB	['GO:0032501']
GO:BP	GO:0044257	cellular protein catabolic process	0.806571	FALSE	"The chemical reactions and pathways resulting in the breakdown of a protein by individual cells." [GOC:jl]	822	818	59	18123	0.0721271	0.0717762	Higher in GroupD	['GO:0030163', 'GO:0044265', 'GO:0044267']
GO:BP	GO:0030216	keratinocyte differentiation	0.819137	FALSE	"The process in which a relatively unspecialized cell acquires specialized features of a keratinocyte." [GOC:dph, GOC:mah, GOC:sdb_2009, GOC:tb]	306	76	7	18123	0.0921053	0.0228758	Higher in GroupD	['GO:0009913', 'GO:0043588']
REAC	REAC:R-HSA-5668541	TNFR2 non-canonical NF-kB pathway	0.820472	FALSE	TNFR2 non-canonical NF-kB pathway	100	1955	31	10622	0.0158568	0.31	Higher in GroupD	['REAC:R-HSA-1280215']
GO:BP	GO:0032101	regulation of response to external stimulus	0.822344	FALSE	"Any process that modulates the frequency, rate or extent of a response to an external stimulus." [GOC:mah]	1238	163	24	18123	0.147239	0.0193861	Higher in GroupD	['GO:0009605', 'GO:0048583']
GO:BP	GO:0021801	cerebral cortex radial glia guided migration	0.825982	FALSE	"The radial migration of neuronal or glial precursor cells along radial glial cells during the development of the cerebral cortex." [GO_REF:0000021, GOC:cls, GOC:dgh, GOC:dph, GOC:jid, PMID:12626695]	26	962	7	18123	0.00727651	0.269231	Higher in GroupB	['GO:0021799', 'GO:0022030']
GO:BP	GO:0022030	telencephalon glial cell migration	0.825982	FALSE	"The orderly movement of glial cells through the telencephalon." [GO_REF:0000021, GOC:cls, GOC:dgh, GOC:dph, GOC:jid]	26	962	7	18123	0.00727651	0.269231	Higher in GroupB	['GO:0008347', 'GO:0022029']
GO:BP	GO:0010533	regulation of activation of Janus kinase activity	0.828203	FALSE	"Any process that modulates the frequency or rate of activation of JAK (Janus Activated Kinase) protein. The activation of JAK protein is the process of introducing a phosphate group to a tyrosine residue of a JAK (Janus Activated Kinase) protein, thereby activating it." [GOC:dph, GOC:tb, PMID:17190829, PMID:9135582]	9	53	2	18123	0.0377358	0.222222	Higher in GroupD	['GO:0042976', 'GO:0045859', 'GO:0050730']
GO:BP	GO:0071383	cellular response to steroid hormone stimulus	0.831692	FALSE	"Any process that results in a change in state or activity of a cell (in terms of movement, secretion, enzyme production, gene expression, etc.) as a result of a steroid hormone stimulus." [GOC:mah]	245	869	25	18123	0.0287687	0.102041	Higher in GroupB	['GO:0032870', 'GO:0048545', 'GO:0071396', 'GO:0071407']
GO:BP	GO:0048514	blood vessel morphogenesis	0.833253	FALSE	"The process in which the anatomical structures of blood vessels are generated and organized. The blood vessel is the vasculature carrying blood." [GOC:jid]	715	313	26	18123	0.0830671	0.0363636	Higher in GroupD	['GO:0001568', 'GO:0035239']
GO:BP	GO:1903364	positive regulation of cellular protein catabolic process	0.834586	FALSE	"Any process that activates or increases the frequency, rate or extent of cellular protein catabolic process." [GO_REF:0000058, GOC:kmv, GOC:obol, GOC:TermGenie, PMID:24785082]	157	301	10	18123	0.0332226	0.0636943	Higher in GroupD	['GO:0031331', 'GO:0032270', 'GO:0044257', 'GO:0045732', 'GO:1903362']
GO:BP	GO:0051129	negative regulation of cellular component organization	0.844673	FALSE	"Any process that stops, prevents, or reduces the frequency, rate or extent of a process involved in the formation, arrangement of constituent parts, or disassembly of cell structures, including the plasma membrane and any external encapsulating structures such as the cell wall and cell envelope." [GOC:ai]	760	756	52	18123	0.0687831	0.0684211	Higher in GroupB	['GO:0016043', 'GO:0048523', 'GO:0051128']
GO:BP	GO:0021799	cerebral cortex radially oriented cell migration	0.850434	FALSE	"The migration of cells in the developing cerebral cortex in which cells move from the ventricular and/or subventricular zone toward the surface of the brain." [GO_REF:0000021, GOC:cls, GOC:dgh, GOC:dph, GOC:jid, PMID:12626695]	34	962	8	18123	0.00831601	0.235294	Higher in GroupB	['GO:0021795']
REAC	REAC:R-HSA-3247509	Chromatin modifying enzymes	0.853975	FALSE	Chromatin modifying enzymes	273	933	39	10622	0.0418006	0.142857	Higher in GroupB	['REAC:R-HSA-4839726']
REAC	REAC:R-HSA-4839726	Chromatin organization	0.853975	FALSE	Chromatin organization	273	933	39	10622	0.0418006	0.142857	Higher in GroupB	['REAC:0000000']
GO:BP	GO:0001568	blood vessel development	0.854986	FALSE	"The process whose specific outcome is the progression of a blood vessel over time, from its formation to the mature structure. The blood vessel is the vasculature carrying blood." [GOC:hjd, UBERON:0001981]	797	313	28	18123	0.0894569	0.0351317	Higher in GroupD	['GO:0001944', 'GO:0048856']
GO:BP	GO:0016055	Wnt signaling pathway	0.856661	FALSE	"The series of molecular signals initiated by binding of a Wnt protein to a frizzled family receptor on the surface of the target cell and ending with a change in cell state." [GOC:dph, GOC:go_curators, PMID:11532397]	533	1027	50	18123	0.0486855	0.0938086	Higher in GroupB	['GO:0198738', 'GO:1905114']
REAC	REAC:R-HSA-8978868	Fatty acid metabolism	0.858404	FALSE	Fatty acid metabolism	173	135	8	10622	0.0592593	0.0462428	Higher in GroupB	['REAC:R-HSA-556833']
GO:BP	GO:0019637	organophosphate metabolic process	0.859704	FALSE	"The chemical reactions and pathways involving organophosphates, any phosphate-containing organic compound." [ISBN:0198506732]	1040	206	25	18123	0.121359	0.0240385	Higher in GroupB	['GO:0006793', 'GO:0071704']
GO:BP	GO:0010648	negative regulation of cell communication	0.860196	FALSE	"Any process that decreases the frequency, rate or extent of cell communication. Cell communication is the process that mediates interactions between a cell and its surroundings. Encompasses interactions such as signaling or attachment between one cell and another cell, between a cell and an extracellular matrix, or between a cell and any other aspect of its environment." [GOC:dph, GOC:tb]	1499	89	18	18123	0.202247	0.012008	Higher in GroupD	['GO:0007154', 'GO:0010646', 'GO:0048523']
GO:BP	GO:0060840	artery development	0.867939	FALSE	"The progression of the artery over time, from its initial formation to the mature structure. An artery is a blood vessel that carries blood away from the heart to a capillary bed." [GOC:dph, GOC:sdb_2009, GOC:tb]	103	58	4	18123	0.0689655	0.038835	Higher in GroupB	['GO:0001568']
GO:BP	GO:0062014	negative regulation of small molecule metabolic process	0.868226	FALSE	"Any process that stops, prevents or reduces the frequency, rate or extent of a small molecule metabolic process." [GOC:vw]	107	101	5	18123	0.049505	0.046729	Higher in GroupB	['GO:0009892', 'GO:0044281', 'GO:0062012']
REAC	REAC:R-HSA-73886	Chromosome Maintenance	0.869196	FALSE	Chromosome Maintenance	139	1202	28	10622	0.0232945	0.201439	Higher in GroupB	['REAC:R-HSA-1640170']
REAC	REAC:R-HSA-3595174	Defective CHST14 causes EDS, musculocontractural type	0.870273	FALSE	Defective CHST14 causes EDS, musculocontractural type	8	786	4	10622	0.00508906	0.5	Higher in GroupB	['REAC:R-HSA-3560782']
GO:BP	GO:0061364	apoptotic process involved in luteolysis	0.871191	FALSE	"The apoptotic process that contributes to luteolysis." [GOC:mtg_apoptosis, PMID:18566128]	3	2	1	18123	0.5	0.333333	Higher in GroupB	['GO:0001554', 'GO:0022412', 'GO:0022602', 'GO:1902742']
KEGG	KEGG:05416	Viral myocarditis	0.875	FALSE	Viral myocarditis	56	1	1	8000	1	0.0178571	Higher in GroupB	['KEGG:00000']
GO:BP	GO:0046474	glycerophospholipid biosynthetic process	0.875509	FALSE	"The chemical reactions and pathways resulting in the formation of glycerophospholipids, any derivative of glycerophosphate that contains at least one O-acyl, O-alkyl, or O-alkenyl group attached to the glycerol residue." [ISBN:0198506732]	259	824	25	18123	0.0303398	0.0965251	Higher in GroupB	['GO:0006650', 'GO:0008654', 'GO:0045017']
GO:BP	GO:0000387	spliceosomal snRNP assembly	0.879156	FALSE	"The aggregation, arrangement and bonding together of one or more snRNA and multiple protein components to form a ribonucleoprotein complex that is involved in formation of the spliceosome." [GOC:krc, GOC:mah, ISBN:0879695897]	40	2353	14	18123	0.00594985	0.35	Higher in GroupD	['GO:0000398', 'GO:0022618']
GO:BP	GO:0023057	negative regulation of signaling	0.88142	FALSE	"Any process that stops, prevents, or reduces the frequency, rate or extent of a signaling process." [GOC:mtg_signal]	1502	89	18	18123	0.202247	0.011984	Higher in GroupD	['GO:0023051', 'GO:0023052', 'GO:0048519']
GO:BP	GO:0010573	vascular endothelial growth factor production	0.883865	FALSE	"The appearance of vascular endothelial growth factor production due to biosynthesis or secretion following a cellular stimulus, resulting in an increase in its intracellular or extracellular levels." [GOC:rl]	62	8	2	18123	0.25	0.0322581	Higher in GroupD	['GO:0001816']
KEGG	KEGG:04510	Focal adhesion	0.888894	FALSE	Focal adhesion	200	90	7	8000	0.0777778	0.035	Higher in GroupD	['KEGG:00000']
GO:BP	GO:0016477	cell migration	0.890014	FALSE	"The controlled self-propelled movement of a cell from one site to a destination guided by molecular cues. Cell migration is a central process in the development and maintenance of multicellular organisms." [GOC:cjm, GOC:dph, GOC:ems, GOC:pf, Wikipedia:Cell_migration]	1660	209	35	18123	0.167464	0.0210843	Higher in GroupB	['GO:0048870']
REAC	REAC:R-HSA-428542	Regulation of commissural axon pathfinding by SLIT and ROBO	0.901041	FALSE	Regulation of commissural axon pathfinding by SLIT and ROBO	9	2	1	10622	0.5	0.111111	Higher in GroupB	['REAC:R-HSA-376176']
GO:BP	GO:0042330	taxis	0.901434	FALSE	"The directed movement of a motile cell or organism in response to an external stimulus." [GOC:jl, ISBN:0192801023]	657	704	44	18123	0.0625	0.0669711	Higher in GroupD	['GO:0009605', 'GO:0040011']
GO:BP	GO:0070125	mitochondrial translational elongation	0.906321	FALSE	"The successive addition of amino acid residues to a nascent polypeptide chain during protein biosynthesis in a mitochondrion." [GOC:mah]	87	1969	21	18123	0.0106653	0.241379	Higher in GroupD	['GO:0006414', 'GO:0032543']
GO:BP	GO:0046427	positive regulation of receptor signaling pathway via JAK-STAT	0.91115	FALSE	"Any process that activates or increases the frequency, rate or extent of the JAK-STAT signaling pathway activity." [GOC:bf]	46	53	3	18123	0.0566038	0.0652174	Higher in GroupD	['GO:0007259', 'GO:0046425', 'GO:1904894']
GO:BP	GO:0044839	cell cycle G2/M phase transition	0.916909	FALSE	"The cell cycle process by which a cell in G2 phase commits to M phase." [GOC:jl, GOC:mtg_cell_cycle]	273	1213	34	18123	0.0280297	0.124542	Higher in GroupB	['GO:0044770']
GO:BP	GO:0034612	response to tumor necrosis factor	0.929453	FALSE	"Any process that results in a change in state or activity of a cell or an organism (in terms of movement, secretion, enzyme production, gene expression, etc.) as a result of a tumor necrosis factor stimulus." [GOC:mah]	332	2	2	18123	1	0.0060241	Higher in GroupD	['GO:0034097']
GO:BP	GO:0032956	regulation of actin cytoskeleton organization	0.933985	FALSE	"Any process that modulates the frequency, rate or extent of the formation, arrangement of constituent parts, or disassembly of cytoskeletal structures comprising actin filaments and their associated proteins." [GOC:mah]	365	977	36	18123	0.0368475	0.0986301	Higher in GroupB	['GO:0030036', 'GO:0032970', 'GO:0051493']
GO:BP	GO:0198738	cell-cell signaling by wnt	0.934517	FALSE	"Any process that mediates the transfer of information from one cell to another, medaited by a wnt family protein ligand. This process includes wnt signal transduction in the receiving cell, release of wnt ligand from a secreting cell as well as any processes that actively facilitate wnt transport and presentation to receptor on the recieving cell." [GOC:dos]	535	1027	50	18123	0.0486855	0.0934579	Higher in GroupB	['GO:0007267']
GO:BP	GO:0001941	postsynaptic membrane organization	0.939263	FALSE	"A process which results in the assembly, arrangement of constituent parts, or disassembly of a postsynaptic membrane, the specialized area of membrane facing the presynaptic membrane on the tip of the nerve ending and separated from it by a minute cleft (the synaptic cleft)." [GOC:dph, GOC:pr]	39	1568	11	18123	0.00701531	0.282051	Higher in GroupD	['GO:0061024', 'GO:0099173']
GO:BP	GO:0090206	negative regulation of cholesterol metabolic process	0.939983	FALSE	"Any process that decreases the rate, frequency, or extent of cholesterol metabolism, the chemical reactions and pathways involving cholesterol, cholest-5-en-3 beta-ol, the principal sterol of vertebrates and the precursor of many steroids, including bile acids and steroid hormones." [GOC:dph, GOC:sl, GOC:tb]	9	58	2	18123	0.0344828	0.222222	Higher in GroupB	['GO:0008203', 'GO:0045939', 'GO:0062014', 'GO:0090181']
GO:BP	GO:0045541	negative regulation of cholesterol biosynthetic process	0.939983	FALSE	"Any process that stops, prevents, or reduces the frequency, rate or extent of the chemical reactions and pathways resulting in the formation of cholesterol." [GOC:go_curators]	9	58	2	18123	0.0344828	0.222222	Higher in GroupB	['GO:0006695', 'GO:0045540', 'GO:0090206', 'GO:0106119', 'GO:1902931']
GO:BP	GO:0106119	negative regulation of sterol biosynthetic process	0.939983	FALSE	"Any process that stops, prevents or reduces the frequency, rate or extent of a sterol biosynthetic process." [GOC:BHF, GOC:BHF_miRNA, GOC:rph, PMID:16459310]	9	58	2	18123	0.0344828	0.222222	Higher in GroupB	['GO:0010894', 'GO:0016126', 'GO:0106118']
GO:BP	GO:0060023	soft palate development	0.940056	FALSE	"The biological process whose specific outcome is the progression of the soft palate from an initial condition to its mature state. This process begins with the formation of the structure and ends with the mature structure, whatever form that may be including its natural destruction. The soft palate is the posterior portion of the palate extending from the posterior edge of the hard palate." [GOC…	5	608	3	18123	0.00493421	0.6	Higher in GroupB	['GO:0048856', 'GO:0062009']
REAC	REAC:R-HSA-168927	TICAM1, RIP1-mediated IKK complex recruitment	0.941442	FALSE	TICAM1, RIP1-mediated IKK complex recruitment	19	1	1	10622	1	0.0526316	Higher in GroupD	['REAC:R-HSA-168164']
GO:BP	GO:0060390	regulation of SMAD protein signal transduction	0.945193	FALSE	"Any process that modulates the rate, frequency or extent of SMAD protein signal transduction. Pathway-restricted SMAD proteins and common-partner SMAD proteins are involved in the transforming growth factor beta receptor signaling pathways." [GOC:BHF, GOC:dph, GOC:tb]	27	1260	8	18123	0.00634921	0.296296	Higher in GroupB	['GO:0009966', 'GO:0060395']
GO:BP	GO:0032060	bleb assembly	0.945349	FALSE	"The assembly of a bleb, a cell extension caused by localized decoupling of the cytoskeleton from the plasma membrane and characterized by rapid formation, rounded shape, and scarcity of organelles within the protrusion. Plasma membrane blebbing occurs during apoptosis and other cellular processes, including cell locomotion, cell division, and as a result of physical or chemical stresses." [GOC:m…	10	269	3	18123	0.0111524	0.3	Higher in GroupB	['GO:0120031']
REAC	REAC:R-HSA-109582	Hemostasis	0.955678	FALSE	Hemostasis	673	29	7	10622	0.241379	0.0104012	Higher in GroupD	['REAC:0000000']
GO:BP	GO:0002224	toll-like receptor signaling pathway	0.96581	FALSE	"Any series of molecular signals generated as a consequence of binding to a toll-like receptor. Toll-like receptors directly bind pattern motifs from a variety of microbial sources to initiate innate immune response." [GO_REF:0000022, GOC:add, ISBN:0781735149, PMID:12467241, PMID:12524386, PMID:12855817, PMID:15585605, PMID:15728447]	163	16	3	18123	0.1875	0.0184049	Higher in GroupB	['GO:0002221']
GO:BP	GO:0051303	establishment of chromosome localization	0.966213	FALSE	"The directed movement of a chromosome to a specific location." [GOC:ai]	82	837	12	18123	0.0143369	0.146341	Higher in GroupB	['GO:0050000', 'GO:0051649', 'GO:0051656']
GO:BP	GO:0045807	positive regulation of endocytosis	0.972886	FALSE	"Any process that activates or increases the frequency, rate or extent of endocytosis." [GOC:go_curators]	102	1435	19	18123	0.0132404	0.186275	Higher in GroupB	['GO:0006897', 'GO:0030100', 'GO:0051050', 'GO:0051130']
KEGG	KEGG:05142	Chagas disease	0.973814	FALSE	Chagas disease	101	98	5	8000	0.0510204	0.049505	Higher in GroupD	['KEGG:00000']
GO:BP	GO:0034341	response to interferon-gamma	0.97513	FALSE	"Any process that results in a change in state or activity of a cell or an organism (in terms of movement, secretion, enzyme production, gene expression, etc.) as a result of an interferon-gamma stimulus. Interferon-gamma is also known as type II interferon." [GOC:add, ISBN:0126896631, PMID:15546383]	198	120	7	18123	0.0583333	0.0353535	Higher in GroupD	['GO:0034097', 'GO:0045087']
GO:BP	GO:0021543	pallium development	0.980973	FALSE	"The process whose specific outcome is the progression of the pallium over time, from its formation to the mature structure. The pallium is the roof region of the telencephalon." [GO_REF:0000021, GOC:cls, GOC:dgh, GOC:dph, GOC:jid, PMID:12626695]	174	962	21	18123	0.0218295	0.12069	Higher in GroupB	['GO:0021537', 'GO:0048856']
GO:BP	GO:0051272	positive regulation of cellular component movement	0.983437	FALSE	"Any process that activates or increases the frequency, rate or extent of the movement of a cellular component." [GOC:ai, GOC:dph, GOC:jl]	605	162	15	18123	0.0925926	0.0247934	Higher in GroupD	['GO:0006928', 'GO:0048522', 'GO:0051270']
GO:BP	GO:0008203	cholesterol metabolic process	0.987533	FALSE	"The chemical reactions and pathways involving cholesterol, cholest-5-en-3 beta-ol, the principal sterol of vertebrates and the precursor of many steroids, including bile acids and steroid hormones. It is a component of the plasma membrane lipid bilayer and of plasma lipoproteins and can be found in all animal tissues." [ISBN:0198506732]	146	463	12	18123	0.0259179	0.0821918	Higher in GroupB	['GO:0016125', 'GO:1902652']
GO:BP	GO:0006476	protein deacetylation	0.992357	FALSE	"The removal of an acetyl group from a protein amino acid. An acetyl group is CH3CO-, derived from acetic [ethanoic] acid." [GOC:ai]	103	108	5	18123	0.0462963	0.0485437	Higher in GroupB	['GO:0035601']
GO:BP	GO:0044784	metaphase/anaphase transition of cell cycle	0.995306	FALSE	"The cell cycle process in which a cell progresses from metaphase to anaphase as part of the cell cycle." [GOC:mtg_cell_cycle]	64	1256	13	18123	0.0103503	0.203125	Higher in GroupB	['GO:0033045', 'GO:0044770']
GO:BP	GO:0008360	regulation of cell shape	0.998485	FALSE	"Any process that modulates the surface configuration of a cell." [GOC:dph, GOC:go_curators, GOC:tb]	157	1224	23	18123	0.0187908	0.146497	Higher in GroupD	['GO:0022604', 'GO:0065008']
GO:BP	GO:0035235	ionotropic glutamate receptor signaling pathway	1	FALSE	"A series of molecular signals initiated by glutamate binding to a glutamate receptor on the surface of the target cell, followed by the movement of ions through a channel in the receptor complex. Ends with regulation of a downstream cellular process, e.g. transcription." [GOC:signaling, ISBN:0198506732]	26	525	2	18123	0.00380952	0.0769231	Higher in GroupD	['GO:0007215']
GO:BP	GO:0035793	positive regulation of metanephric mesenchymal cell migration by platelet-derived growth factor receptor-beta signaling pathway	1	FALSE	"Any process that increases the frequency, rate or extent of metanephric mesenchymal cell migration as a result of the series of molecular signals generated as a consequence of a platelet-derived growth factor receptor-beta binding to one of its physiological ligands." [GOC:bf, GOC:mtg_kidney_jan10, GOC:yaf, PMID:10734101]	3	537	2	18123	0.00372439	0.666667	Higher in GroupD	['GO:1900238', 'GO:2000591']
GO:BP	GO:0035150	regulation of tube size	1	FALSE	"Ensuring that a tube is of the correct length and diameter. Tube size must be maintained not only during tube formation, but also throughout development and in some physiological processes." [PMID:10887083]	137	42	1	18123	0.0238095	0.00729927	Higher in GroupD	['GO:0090066']
GO:BP	GO:0035264	multicellular organism growth	1	FALSE	"The increase in size or mass of an entire multicellular organism, as opposed to cell growth." [GOC:bf, GOC:curators, GOC:dph, GOC:tb]	141	151	4	18123	0.0264901	0.0283688	Higher in GroupD	['GO:0032501', 'GO:0048589']
GO:BP	GO:0035265	organ growth	1	FALSE	"The increase in size or mass of an organ. Organs are commonly observed as visibly distinct structures, but may also exist as loosely associated clusters of cells that function together as to perform a specific function." [GOC:bf, ISBN:0471245208, ISBN:0721662544]	184	617	7	18123	0.0113452	0.0380435	Higher in GroupD	['GO:0032501', 'GO:0048589']
GO:BP	GO:0035246	peptidyl-arginine N-methylation	1	FALSE	"The addition of a methyl group onto a nitrogen atom of an arginine residue in a protein." [GOC:bf]	11	737	1	18123	0.00135685	0.0909091	Higher in GroupD	['GO:0018216']
GO:BP	GO:0035268	protein mannosylation	1	FALSE	"The addition of a mannose residue to a protein acceptor molecule." [GOC:bf, GOC:pr]	23	2707	1	18123	0.000369413	0.0434783	Higher in GroupD	['GO:0006486', 'GO:0097502']
GO:BP	GO:0035740	CD8-positive, alpha-beta T cell proliferation	1	FALSE	"The expansion of a CD8-positive, alpha-beta T cell population by cell division." [CL:0000625, GOC:BHF]	8	692	3	18123	0.00433526	0.375	Higher in GroupD	['GO:0036037', 'GO:0046633']
GO:BP	GO:0035249	synaptic transmission, glutamatergic	1	FALSE	"The vesicular release of glutamate from a presynapse, across a chemical synapse, the subsequent activation of glutamate receptors at the postsynapse of a target cell (neuron, muscle, or secretory cell) and the effects of this activation on the postsynaptic membrane potential and ionic composition of the postsynaptic cytosol. This process encompasses both spontaneous and evoked release of neurotr…	94	1074	7	18123	0.00651769	0.0744681	Higher in GroupD	['GO:0007268']
GO:BP	GO:0035791	platelet-derived growth factor receptor-beta signaling pathway	1	FALSE	"A series of molecular signals initiated by the binding of a ligand to a beta-type platelet-derived growth factor receptor (PDGFbeta) on the surface of a signal-receiving cell, and ending with regulation of a downstream cellular process, e.g. transcription." [GOC:bf, GOC:signaling, GOC:yaf, PMID:10372961]	15	63	2	18123	0.031746	0.133333	Higher in GroupD	['GO:0048008']
GO:BP	GO:0035239	tube morphogenesis	1	FALSE	"The process in which the anatomical structures of a tube are generated and organized. Epithelial and endothelial tubes transport gases, liquids and cells from one site to another and form the basic structure of many organs and tissues, with tube shape and organization varying from the single-celled excretory organ in Caenorhabditis elegans to the branching trees of the mammalian kidney and insec…	956	322	29	18123	0.0900621	0.0303347	Higher in GroupD	['GO:0009653', 'GO:0035295']
GO:BP	GO:0035196	production of miRNAs involved in gene silencing by miRNA	1	FALSE	"Cleavage of stem-loop RNA precursors into microRNAs (miRNAs), a class of small RNAs that primarily silence genes by blocking the translation of mRNA transcripts into protein, or by increasing the degradation of non-protein-coding RNA transcripts." [GOC:aruk, GOC:bc, GOC:dph, GOC:rl, GOC:tb, PMID:15066275, PMID:15066283, PMID:23985560, PMID:28379604]	51	1999	6	18123	0.0030015	0.117647	Higher in GroupD	['GO:0035195', 'GO:0070918']
GO:BP	GO:0035234	ectopic germ cell programmed cell death	1	FALSE	"Programmed cell death of an errant germ line cell that is outside the normal migratory path or ectopic to the gonad. This is an important mechanism of regulating germ cell survival within the embryo." [PMID:12814944]	6	175	1	18123	0.00571429	0.166667	Higher in GroupD	['GO:0003006', 'GO:0010623']
GO:BP	GO:0035195	gene silencing by miRNA	1	FALSE	"Downregulation of gene expression through the action of microRNAs (miRNAs), endogenous 21-24 nucleotide small RNAs processed from stem-loop RNA precursors (pre-miRNAs). Once incorporated into a RNA-induced silencing complex (RISC), miRNAs can downregulate gene expression by either of two posttranscriptional mechanisms: endolytic cleavage of the RNA (often mRNA) or mRNA translational repression, …	412	248	4	18123	0.016129	0.00970874	Higher in GroupD	['GO:0035194']
GO:BP	GO:0035272	exocrine system development	1	FALSE	"Progression of the exocrine system over time, from its formation to a mature structure. The exocrine system is a system of hormones and glands, where the glands secrete straight to a target site via ducts or tubes. The human exocrine system includes the salivary glands, sweat glands and many glands of the digestive system." [GOC:bf, Wikipedia:Exocrine_gland]	44	445	3	18123	0.00674157	0.0681818	Higher in GroupD	['GO:0048731']
GO:BP	GO:0035771	interleukin-4-mediated signaling pathway	1	FALSE	"A series of molecular signals initiated by the binding of interleukin-4 to a receptor on the surface of a cell, and ending with regulation of a downstream cellular process, e.g. transcription." [GOC:BHF, GOC:signaling]	7	1351	1	18123	0.000740192	0.142857	Higher in GroupD	['GO:0019221', 'GO:0071353']
GO:BP	GO:0035768	endothelial cell chemotaxis to fibroblast growth factor	1	FALSE	"The directed movement of an endothelial cell in response to the presence of fibroblast growth factor (FGF)." [CL:0000115, GOC:BHF]	11	2658	1	18123	0.000376223	0.0909091	Higher in GroupD	['GO:0035766', 'GO:0035767']
GO:BP	GO:0035194	post-transcriptional gene silencing by RNA	1	FALSE	"Any process of posttranscriptional gene inactivation (silencing) mediated by small RNA molecules that may trigger RNA (often mRNA) degradation or negatively regulate mRNA translation." [GOC:aruk, GOC:bc, GOC:mah, GOC:rl, PMID:15020054, PMID:15066275, PMID:15066283, PMID:23985560, PMID:28379604]	420	248	4	18123	0.016129	0.00952381	Higher in GroupD	['GO:0016441', 'GO:0031047']
GO:BP	GO:0035767	endothelial cell chemotaxis	1	FALSE	"The directed movement of an endothelial cell guided by a specific chemical concentration gradient. Movement may be towards a higher concentration (positive chemotaxis) or towards a lower concentration (negative chemotaxis)." [CL:0000115, GOC:BHF]	33	1266	2	18123	0.00157978	0.0606061	Higher in GroupD	['GO:0043542', 'GO:0060326']
GO:BP	GO:0035270	endocrine system development	1	FALSE	"Progression of the endocrine system over time, from its formation to a mature structure. The endocrine system is a system of hormones and ductless glands, where the glands release hormones directly into the blood, lymph or other intercellular fluid, and the hormones circulate within the body to affect distant organs. The major glands that make up the human endocrine system are the hypothalamus, …	133	39	2	18123	0.0512821	0.0150376	Higher in GroupD	['GO:0048731']
GO:BP	GO:0035766	cell chemotaxis to fibroblast growth factor	1	FALSE	"The directed movement of a motile cell in response to the presence of fibroblast growth factor (FGF)." [GOC:BHF]	12	2658	1	18123	0.000376223	0.0833333	Higher in GroupD	['GO:0044344', 'GO:0060326']
GO:BP	GO:0035754	B cell chemotaxis	1	FALSE	"The directed movement of a B cell guided by a specific chemical concentration gradient. Movement may be towards a higher concentration (positive chemotaxis) or towards a lower concentration (negative chemotaxis)." [CL:0000236, GOC:BHF]	8	1011	1	18123	0.00098912	0.125	Higher in GroupD	['GO:0048247']
GO:BP	GO:0035188	hatching	1	FALSE	"The emergence of an immature organism from a protective structure." [GOC:dgh, GOC:isa_complete, ISBN:0198612001]	27	485	2	18123	0.00412371	0.0740741	Higher in GroupD	['GO:0007275', 'GO:0071684']
GO:BP	GO:0035773	insulin secretion involved in cellular response to glucose stimulus	1	FALSE	"The regulated release of proinsulin from secretory granules (B granules) in the B cells of the pancreas; accompanied by cleavage of proinsulin to form mature insulin, in response to a glucose stimulus." [GOC:bf, GOC:yaf, PMID:8492079]	73	241	1	18123	0.00414938	0.0136986	Higher in GroupD	['GO:0030073', 'GO:0051649', 'GO:0071333']
GO:BP	GO:0035751	regulation of lysosomal lumen pH	1	FALSE	"Any process that modulates the pH of the lysosomal lumen, measured by the concentration of the hydrogen ion." [GOC:rph]	16	271	2	18123	0.00738007	0.125	Higher in GroupD	['GO:0007040', 'GO:0051453']
GO:BP	GO:0035750	protein localization to myelin sheath abaxonal region	1	FALSE	"Any process in which a protein is transported to, and/or maintained in, the abaxonal region of the myelin sheath. The abaxonal region is the region of the myelin sheath furthest from the axon." [GOC:BHF, PMID:20237282]	1	1947	1	18123	0.000513611	1	Higher in GroupD	['GO:0034613']
GO:BP	GO:0035747	natural killer cell chemotaxis	1	FALSE	"The directed movement of a natural killer cell guided by a specific chemical concentration gradient. Movement may be towards a higher concentration (positive chemotaxis) or towards a lower concentration (negative chemotaxis)." [CL:0000623, GOC:BHF]	10	57	2	18123	0.0350877	0.2	Higher in GroupD	['GO:0048247']
GO:BP	GO:0035789	metanephric mesenchymal cell migration	1	FALSE	"The orderly movement of undifferentiated metanephric mesenchymal cells (precursors to metanephric mesangial cells) from the mesenchyme into the cleft of the developing glomerulus, during development of the metanephros." [GOC:bf, GOC:mtg_kidney_jan10, GOC:yaf, PMID:10734101, PMID:19019919]	4	537	2	18123	0.00372439	0.5	Higher in GroupD	['GO:0035788']
GO:BP	GO:0035176	social behavior	1	FALSE	"Behavior directed towards society, or taking place between members of the same species. Occurs predominantly, or only, in individuals that are part of a group." [GOC:jh2, PMID:12848939, Wikipedia:Social_behavior]	51	1650	7	18123	0.00424242	0.137255	Higher in GroupD	['GO:0007610', 'GO:0051703']
GO:BP	GO:0035745	T-helper 2 cell cytokine production	1	FALSE	"Any process that contributes to cytokine production by a T-helper 2 cell." [CL:0000546, GOC:BHF]	13	1032	2	18123	0.00193798	0.153846	Higher in GroupD	['GO:0035743', 'GO:0042092']
GO:BP	GO:0035774	positive regulation of insulin secretion involved in cellular response to glucose stimulus	1	FALSE	"Any process that increases the frequency, rate or extent of the regulated release of insulin that contributes to the response of a cell to glucose." [GOC:bf, GOC:yaf]	37	2484	4	18123	0.00161031	0.108108	Higher in GroupD	['GO:0032024', 'GO:0035773', 'GO:0061178']
GO:BP	GO:0035783	CD4-positive, alpha-beta T cell costimulation	1	FALSE	"The process of providing, via surface-bound receptor-ligand pairs, a second, antigen-independent, signal in addition to that provided by the T cell receptor to augment CD4-positive, alpha-beta T cell activation." [CL:0000624, GOC:BHF, GOC:pr]	3	2195	1	18123	0.000455581	0.333333	Higher in GroupD	['GO:0031295', 'GO:2000516']
GO:BP	GO:0035790	platelet-derived growth factor receptor-alpha signaling pathway	1	FALSE	"A series of molecular signals initiated by the binding of a ligand to an alpha-type platelet-derived growth factor receptor (PDGFalpha) on the surface of a signal-receiving cell, and ending with regulation of a downstream cellular process, e.g. transcription." [GOC:bf, GOC:yaf, PMID:10372961]	6	466	1	18123	0.00214592	0.166667	Higher in GroupD	['GO:0048008']
GO:BP	GO:0035787	cell migration involved in kidney development	1	FALSE	"The orderly movement of a cell from one site to another that will contribute to the progression of the kidney over time, from its formation to the mature organ." [GOC:bf, GOC:mtg_kidney_jan10, GOC:yaf]	5	537	2	18123	0.00372439	0.4	Higher in GroupD	['GO:0001822', 'GO:0016477']
GO:BP	GO:0035162	embryonic hemopoiesis	1	FALSE	"The stages of blood cell formation that take place within the embryo." [GOC:bf]	23	645	2	18123	0.00310078	0.0869565	Higher in GroupD	['GO:0030097', 'GO:0048568']
GO:BP	GO:0035788	cell migration involved in metanephros development	1	FALSE	"The orderly movement of a cell from one site to another that will contribute to the progression of the metanephric kidney over time, from its formation to the mature organ." [GOC:bf, GOC:mtg_kidney_jan10, GOC:yaf]	4	537	2	18123	0.00372439	0.5	Higher in GroupD	['GO:0001656', 'GO:0035787']
GO:BP	GO:0035269	protein O-linked mannosylation	1	FALSE	"The transfer of mannose from dolichyl activated mannose to the hydroxyl group of a seryl or threonyl residue of a protein acceptor molecule, to form an O-linked protein-sugar linkage." [GOC:bf, PMID:9878797]	18	2707	1	18123	0.000369413	0.0555556	Higher in GroupD	['GO:0006493', 'GO:0035268']
GO:BP	GO:0035744	T-helper 1 cell cytokine production	1	FALSE	"Any process that contributes to cytokine production by a T-helper 1 cell." [CL:0000545, GOC:BHF]	6	427	1	18123	0.00234192	0.166667	Higher in GroupD	['GO:0035743', 'GO:0042088']
GO:BP	GO:0035743	CD4-positive, alpha-beta T cell cytokine production	1	FALSE	"Any process that contributes to cytokine production by a CD4-positive, alpha-beta T cell." [CL:0000624, GOC:BHF]	18	1032	3	18123	0.00290698	0.166667	Higher in GroupD	['GO:0002369']
GO:BP	GO:0035247	peptidyl-arginine omega-N-methylation	1	FALSE	"The addition of a methyl group onto a terminal nitrogen (omega nitrogen) atom of an arginine residue in a protein." [PMID:14705965, RESID:AA0067, RESID:AA0068, RESID:AA0069]	9	737	1	18123	0.00135685	0.111111	Higher in GroupD	['GO:0035246']
GO:BP	GO:0035459	vesicle cargo loading	1	FALSE	"The formation of a macromolecular complex between the coat proteins and proteins and/or lipoproteins that are going to be transported by a vesicle." [GOC:bf, GOC:lb]	26	1829	2	18123	0.00109349	0.0769231	Higher in GroupD	['GO:0006810', 'GO:0016192']
GO:BP	GO:0035279	mRNA cleavage involved in gene silencing by miRNA	1	FALSE	"The process in which microRNAs (miRNAs) direct the cleavage of target mRNAs. Once incorporated into a RNA-induced silencing complex (RISC), a miRNA base pairing with near-perfect complementarity to the target mRNA will typically direct targeted endonucleolytic cleavage of the mRNA. Many plant miRNAs downregulate gene expression through this mechanism." [GOC:dph, GOC:mtg_lung, PMID:14744438, PMID…	3	2607	1	18123	0.000383583	0.333333	Higher in GroupD	['GO:0035195', 'GO:0098795']
GO:BP	GO:0035418	protein localization to synapse	1	FALSE	"Any process in which a protein is transported to, and/or maintained at the synapse, the junction between a nerve fiber of one neuron and another neuron or muscle fiber or glial cell." [GOC:bf]	66	525	3	18123	0.00571429	0.0454545	Higher in GroupD	['GO:1902414']
GO:BP	GO:0035561	regulation of chromatin binding	1	FALSE	"Any process that modulates the frequency, rate or extent of chromatin binding. Chromatin binding is the selective interaction with chromatin, the network of fibers of DNA, protein, and sometimes RNA, that make up the chromosomes of the eukaryotic nucleus during interphase." [GOC:bf, PMID:20404130]	22	297	2	18123	0.00673401	0.0909091	Higher in GroupD	['GO:0051098']
GO:BP	GO:0035562	negative regulation of chromatin binding	1	FALSE	"Any process that stops or reduces the frequency, rate or extent of chromatin binding. Chromatin binding is the selective interaction with chromatin, the network of fibers of DNA, protein, and sometimes RNA, that make up the chromosomes of the eukaryotic nucleus during interphase." [GOC:bf, PMID:20404130]	8	1175	2	18123	0.00170213	0.25	Higher in GroupD	['GO:0035561', 'GO:0051100']
GO:BP	GO:0035563	positive regulation of chromatin binding	1	FALSE	"Any process that increases the frequency, rate or extent of chromatin binding. Chromatin binding is the selective interaction with chromatin, the network of fibers of DNA, protein, and sometimes RNA, that make up the chromosomes of the eukaryotic nucleus during interphase." [GOC:bf, PMID:20404130]	14	239	1	18123	0.0041841	0.0714286	Higher in GroupD	['GO:0035561', 'GO:0051099']
GO:BP	GO:0035567	non-canonical Wnt signaling pathway	1	FALSE	"The series of molecular signals initiated by binding of a Wnt protein to a frizzled family receptor on the surface of the target cell, followed by propagation of the signal via effectors other than beta-catenin." [GOC:signaling]	151	2623	25	18123	0.00953107	0.165563	Higher in GroupD	['GO:0016055']
GO:BP	GO:0035404	histone-serine phosphorylation	1	FALSE	"The modification of histones by addition of a phosphate group to a serine residue." [GOC:bf]	10	459	1	18123	0.00217865	0.1	Higher in GroupD	['GO:0016572', 'GO:0018105']
GO:BP	GO:0035574	histone H4-K20 demethylation	1	FALSE	"The modification of histone H4 by the removal of a methyl group from lysine at position 20 of the histone." [GOC:sp, PMID:20622853]	2	1131	1	18123	0.000884173	0.5	Higher in GroupD	['GO:0070076']
GO:BP	GO:0035581	sequestering of extracellular ligand from receptor	1	FALSE	"The process of binding or confining an extracellular signaling ligand, such that the ligand is unable to bind to its cell surface receptor." [GOC:BHF, GOC:signaling]	14	279	1	18123	0.00358423	0.0714286	Higher in GroupD	['GO:1900116']
GO:BP	GO:0035384	thioester biosynthetic process	1	FALSE	"The chemical reactions and pathways resulting in the formation of a thioester, a compound of general formula RC(=O)SR' in which the linking oxygen in an ester is replaced by a sulfur atom. They are the product of esterification between a carboxylic acid and a thiol." [GOC:bf, http://encyclopedia.thefreedictionary.com/Thioester]	54	307	5	18123	0.0162866	0.0925926	Higher in GroupD	['GO:0035383', 'GO:0044272', 'GO:1901576']
GO:BP	GO:0035584	calcium-mediated signaling using intracellular calcium source	1	FALSE	"A series of molecular signals in which a cell uses calcium ions released from an intracellular store to convert a signal into a response." [GOC:bf, GOC:BHF, PMID:20192754]	22	517	2	18123	0.00386847	0.0909091	Higher in GroupD	['GO:0019722']
GO:BP	GO:0035383	thioester metabolic process	1	FALSE	"The chemical reactions and pathways involving a thioester, a compound of general formula RC(=O)SR' in which the linking oxygen in an ester is replaced by a sulfur atom. They are the product of esterification between a carboxylic acid and a thiol." [GOC:bf, Wikipedia:Thioester]	105	307	5	18123	0.0162866	0.047619	Higher in GroupD	['GO:0006790', 'GO:0071704']
GO:BP	GO:0035378	carbon dioxide transmembrane transport	1	FALSE	"The process in which carbon dioxide (CO2) is transported across a membrane." [GOC:yaf]	2	1463	1	18123	0.000683527	0.5	Higher in GroupD	['GO:0015670', 'GO:0055085']
GO:BP	GO:0035588	G protein-coupled purinergic receptor signaling pathway	1	FALSE	"The series of molecular signals generated as a consequence of a receptor binding to an extracellular purine or purine derivative and transmitting the signal to a heterotrimeric G-protein complex to initiate a change in cell activity." [GOC:BHF, PMID:9755289]	13	330	1	18123	0.0030303	0.0769231	Higher in GroupD	['GO:0007186', 'GO:0035590']
GO:BP	GO:0035589	G protein-coupled purinergic nucleotide receptor signaling pathway	1	FALSE	"The series of molecular signals generated as a consequence of a receptor binding to an extracellular purine nucleotide and transmitting the signal to a heterotrimeric G-protein complex to initiate a change in cell activity." [GOC:BHF, PMID:9755289]	15	2464	3	18123	0.00121753	0.2	Higher in GroupD	['GO:0035590']
GO:BP	GO:0035377	transepithelial water transport	1	FALSE	"The directed movement of water (H2O) from one side of an epithelium to the other." [GOC:yaf]	3	1463	1	18123	0.000683527	0.333333	Higher in GroupD	['GO:0006833', 'GO:0042045']
GO:BP	GO:0035590	purinergic nucleotide receptor signaling pathway	1	FALSE	"The series of molecular signals generated as a consequence of a receptor binding to an extracellular purine nucleotide to initiate a change in cell activity." [GOC:BHF, PMID:9755289]	52	427	5	18123	0.0117096	0.0961538	Higher in GroupD	['GO:0007166']
GO:BP	GO:0035372	protein localization to microtubule	1	FALSE	"A process in which a protein is transported to, or maintained at, a microtubule." [GOC:bf, GOC:lb]	18	1689	4	18123	0.00236827	0.222222	Higher in GroupD	['GO:0072698']
GO:BP	GO:0035357	peroxisome proliferator activated receptor signaling pathway	1	FALSE	"The series of molecular signals initiated by binding of a ligand to any of the peroxisome proliferator activated receptors (alpha, beta or gamma) in the nuclear membrane, and ending with the initiation or termination of the transcription of target genes." [GOC:BHF, PMID:18221086]	21	558	1	18123	0.00179211	0.047619	Higher in GroupD	['GO:0030522']
GO:BP	GO:0035592	establishment of protein localization to extracellular region	1	FALSE	"The directed movement of a protein to a specific location within the extracellular region." [GOC:bf, GOC:BHF]	382	175	5	18123	0.0285714	0.013089	Higher in GroupD	['GO:0045184', 'GO:0071692']
GO:BP	GO:0035600	tRNA methylthiolation	1	FALSE	"The addition of a methylthioether group (-SCH3) to a nucleotide in a tRNA molecule." [PMID:20472640]	2	180	1	18123	0.00555556	0.5	Higher in GroupD	['GO:0006400']
GO:BP	GO:0035356	cellular triglyceride homeostasis	1	FALSE	"Any process involved in the maintenance of an internal steady state of triglyceride within a cell or between a cell and its external environment." [GOC:BHF]	7	1965	1	18123	0.000508906	0.142857	Higher in GroupD	['GO:0055082', 'GO:0070328']
GO:BP	GO:0035601	protein deacylation	1	FALSE	"The removal of an acyl group, any group or radical of the form RCO- where R is an organic group, from a protein amino acid." [GOC:se, PMID:12080046]	114	898	8	18123	0.00890869	0.0701754	Higher in GroupD	['GO:0006464', 'GO:0098732']
GO:BP	GO:0035616	histone H2B conserved C-terminal lysine deubiquitination	1	FALSE	"A histone deubiquitination process in which a ubiquitin monomer is removed from a conserved lysine residue in the C-terminus of histone H2B. The conserved lysine residue is K119 in fission yeast, K123 in budding yeast, or K120 in mammals." [GOC:bf, GOC:vw, PMID:15657442]	4	777	2	18123	0.002574	0.5	Higher in GroupD	['GO:0016578']
GO:BP	GO:0035552	oxidative single-stranded DNA demethylation	1	FALSE	"Removal of the methyl group from one or more nucleotides within a single-stranded DNA molecule involving the oxidation (i.e. electron loss) of one or more atoms." [GOC:BHF, GOC:rl, PMID:18775698]	3	900	1	18123	0.00111111	0.333333	Higher in GroupD	['GO:0035511']
GO:BP	GO:0035542	regulation of SNARE complex assembly	1	FALSE	"Any process that modulates the frequency, rate or extent of assembly of the SNARE complex. The SNARE complex is a protein complex involved in membrane fusion; a stable ternary complex consisting of a four-helix bundle, usually formed from one R-SNARE and three Q-SNAREs with an ionic layer sandwiched between hydrophobic layers." [GOC:rb]	10	1336	1	18123	0.000748503	0.1	Higher in GroupD	['GO:0035493', 'GO:0043254']
GO:BP	GO:0035425	autocrine signaling	1	FALSE	"Signaling between cells of the same type. The signal produced by the signaling cell binds to a receptor on, and affects a cell of the same type." [GOC:bf, ISBN:3527303782]	8	2445	1	18123	0.000408998	0.125	Higher in GroupD	['GO:0007267']
GO:BP	GO:0035434	copper ion transmembrane transport	1	FALSE	"The directed movement of copper cation across a membrane." [GOC:vw]	7	1007	1	18123	0.000993049	0.142857	Higher in GroupD	['GO:0006825', 'GO:0098662']
GO:BP	GO:0035458	cellular response to interferon-beta	1	FALSE	"Any process that results in a change in state or activity of a cell (in terms of movement, secretion, enzyme production, gene expression, etc.) as a result of an interferon-beta stimulus. Interferon-beta is a type I interferon." [GOC:sl]	23	29	1	18123	0.0344828	0.0434783	Higher in GroupD	['GO:0035456', 'GO:0071345']
GO:BP	GO:0035457	cellular response to interferon-alpha	1	FALSE	"Any process that results in a change in state or activity of a cell (in terms of movement, secretion, enzyme production, gene expression, etc.) as a result of an interferon-alpha stimulus. Interferon-alpha is a type I interferon." [GOC:sl]	13	1292	1	18123	0.000773994	0.0769231	Higher in GroupD	['GO:0035455', 'GO:0071345']
GO:BP	GO:0035461	vitamin transmembrane transport	1	FALSE	"The process in which a vitamin is transported across a membrane. A vitamin is one of a number of unrelated organic substances that occur in many foods in small amounts and that are necessary in trace amounts for the normal metabolic functioning of the body." [GOC:bf]	17	1879	1	18123	0.000532198	0.0588235	Higher in GroupD	['GO:0051180', 'GO:0055085']
GO:BP	GO:0035490	regulation of leukotriene production involved in inflammatory response	1	FALSE	"Any process that modulates the rate, frequency or extent of the synthesis or release of any leukotriene following a stimulus as part of an inflammatory response." [GOC:bf]	1	229	1	18123	0.00436681	1	Higher in GroupD	['GO:0002540', 'GO:0051239']
GO:BP	GO:0035456	response to interferon-beta	1	FALSE	"Any process that results in a change in state or activity of a cell or an organism (in terms of movement, secretion, enzyme production, gene expression, etc.) as a result of an interferon-beta stimulus. Interferon-beta is a type I interferon." [GOC:sl, PMID:9561374]	31	29	1	18123	0.0344828	0.0322581	Higher in GroupD	['GO:0034097']
GO:BP	GO:0035491	positive regulation of leukotriene production involved in inflammatory response	1	FALSE	"Any process that increases the rate, frequency or extent of the synthesis or release of any leukotriene following a stimulus as part of an inflammatory response." [GOC:bf]	1	229	1	18123	0.00436681	1	Higher in GroupD	['GO:0002540', 'GO:0035490', 'GO:0050729', 'GO:0051240']
GO:BP	GO:0035493	SNARE complex assembly	1	FALSE	"The aggregation, arrangement and bonding together of a set of components to form a SNARE complex, a protein complex involved in membrane fusion; a stable ternary complex consisting of a four-helix bundle, usually formed from one R-SNARE and three Q-SNAREs with an ionic layer sandwiched between hydrophobic layers." [GOC:rb, PMID:10872468]	19	1336	2	18123	0.00149701	0.105263	Higher in GroupD	['GO:0006906', 'GO:0034622']
GO:BP	GO:0035504	regulation of myosin light chain kinase activity	1	FALSE	"Any process that modulates the frequency, rate or extent of myosin light chain kinase activity." [GOC:bf, GOC:go_curators]	2	559	2	18123	0.00357782	1	Higher in GroupD	['GO:0071900']
GO:BP	GO:0035505	positive regulation of myosin light chain kinase activity	1	FALSE	"Any process that activates or increases the frequency, rate or extent of myosin light chain kinase activity." [GOC:bf, GOC:go_curators]	2	559	2	18123	0.00357782	1	Higher in GroupD	['GO:0035504', 'GO:0071902']
GO:BP	GO:0035507	regulation of myosin-light-chain-phosphatase activity	1	FALSE	"Any process that modulates the frequency, rate or extent of myosin-light-chain-phosphatase activity." [GOC:bf, GOC:go_curators]	7	1913	2	18123	0.00104548	0.285714	Higher in GroupD	['GO:0043666']
GO:BP	GO:0035509	negative regulation of myosin-light-chain-phosphatase activity	1	FALSE	"Any process that stops, prevents, or reduces the frequency, rate or extent of myosin-light-chain-phosphatase activity." [GOC:bf, GOC:go_curators]	5	1913	2	18123	0.00104548	0.4	Higher in GroupD	['GO:0032515', 'GO:0035507']
GO:BP	GO:0035621	ER to Golgi ceramide transport	1	FALSE	"The directed movement of a ceramide from the endoplasmic reticulum (ER) to the Golgi. Ceramides are a class of lipid composed of sphingosine linked to a fatty acid." [GOC:sart, PMID:14685229]	3	679	1	18123	0.00147275	0.333333	Higher in GroupD	['GO:0032365', 'GO:0035627']
GO:BP	GO:0035510	DNA dealkylation	1	FALSE	"The removal of an alkyl group from one or more nucleotides within an DNA molecule." [GOC:bf]	34	79	2	18123	0.0253165	0.0588235	Higher in GroupD	['GO:0006304']
GO:BP	GO:0035513	oxidative RNA demethylation	1	FALSE	"The removal of the methyl group from one or more nucleotides within an RNA molecule involving oxidation (i.e. electron loss) of one or more atoms." [PMID:12594517, PMID:16482161, PMID:18775698]	5	900	1	18123	0.00111111	0.2	Higher in GroupD	['GO:0009451', 'GO:0070989']
GO:BP	GO:0035455	response to interferon-alpha	1	FALSE	"Any process that results in a change in state or activity of a cell or an organism (in terms of movement, secretion, enzyme production, gene expression, etc.) as a result of an interferon-alpha stimulus. Interferon-alpha is a type I interferon." [GOC:sl, PMID:11356686]	23	1292	1	18123	0.000773994	0.0434783	Higher in GroupD	['GO:0034097']
GO:BP	GO:0035443	tripeptide transmembrane transport	1	FALSE	"The directed movement of a tripeptide across a membrane by means of some agent such as a transporter or pore. A tripeptide is a compound containing three amino acids linked together by peptide bonds." [GOC:vw]	7	1696	1	18123	0.000589623	0.142857	Higher in GroupD	['GO:0035672', 'GO:0042939']
GO:BP	GO:0035518	histone H2A monoubiquitination	1	FALSE	"The modification of histone H2A by addition of a single ubiquitin group." [PMID:18206970]	17	724	4	18123	0.00552486	0.235294	Higher in GroupD	['GO:0010390', 'GO:0033522']
GO:BP	GO:0035442	dipeptide transmembrane transport	1	FALSE	"The directed movement of a dipeptide across a membrane by means of some agent such as a transporter or pore. A dipeptide is a combination of two amino acids linked together by a peptide (-CO-NH-) bond." [GOC:vw]	7	842	1	18123	0.00118765	0.142857	Higher in GroupD	['GO:0035672', 'GO:0042938']
GO:BP	GO:0035519	protein K29-linked ubiquitination	1	FALSE	"A protein ubiquitination process in which a polymer of ubiquitin, formed by linkages between lysine residues at position 29 of the ubiquitin monomers, is added to a protein. K29-linked ubiquitination targets the substrate protein for degradation." [PMID:17028573]	6	780	1	18123	0.00128205	0.166667	Higher in GroupD	['GO:0000209']
GO:BP	GO:0035520	monoubiquitinated protein deubiquitination	1	FALSE	"The removal of the ubiquitin group from a monoubiquitinated protein." [GOC:bf]	10	2158	5	18123	0.00231696	0.5	Higher in GroupD	['GO:0016579']
GO:BP	GO:0035521	monoubiquitinated histone deubiquitination	1	FALSE	"The removal of the ubiquitin group from a monoubiquitinated histone protein." [GOC:bf, PMID:20436459]	4	2158	2	18123	0.000926784	0.5	Higher in GroupD	['GO:0016578', 'GO:0035520']
GO:BP	GO:0035435	phosphate ion transmembrane transport	1	FALSE	"The process in which a phosphate is transported across a membrane." [GOC:vw]	14	305	2	18123	0.00655738	0.142857	Higher in GroupD	['GO:0006817', 'GO:0098661']
GO:BP	GO:0035522	monoubiquitinated histone H2A deubiquitination	1	FALSE	"The removal of the ubiquitin group from a monoubiquitinated histone H2A protein." [GOC:bf, PMID:18226187, PMID:20436459]	4	2158	2	18123	0.000926784	0.5	Higher in GroupD	['GO:0035521']
GO:BP	GO:0035523	protein K29-linked deubiquitination	1	FALSE	"A protein deubiquitination process in which a K29-linked ubiquitin chain, i.e. a polymer of ubiquitin formed by linkages between lysine residues at position 29 of the ubiquitin monomers, is removed from a protein." [GOC:bf]	5	3	1	18123	0.333333	0.2	Higher in GroupD	['GO:0016579']
GO:BP	GO:0035511	oxidative DNA demethylation	1	FALSE	"Removal of the methyl group from one or more nucleotides within a DNA molecule involving the oxidation (i.e. electron loss) of one or more atoms." [PMID:12594517, PMID:16482161, PMID:18775698]	6	68	1	18123	0.0147059	0.166667	Higher in GroupD	['GO:0070989', 'GO:0080111']
GO:BP	GO:0035278	miRNA mediated inhibition of translation	1	FALSE	"The process in which microRNAs (miRNAs) block the translation of target mRNAs into proteins. Once incorporated into a RNA-induced silencing complex (RISC), a miRNA will typically mediate repression of translation if the miRNA imperfectly base-pairs with the 3' untranslated regions of target mRNAs." [PMID:14744438, PMID:15196554]	105	219	2	18123	0.00913242	0.0190476	Higher in GroupD	['GO:0035195', 'GO:0040033']
GO:BP	GO:0035350	FAD transmembrane transport	1	FALSE	"The process in which flavin-adenine dinucleotide (FAD) is transported across a membrane. FAD forms the coenzyme of the prosthetic group of various flavoprotein oxidoreductase enzymes, in which it functions as an electron acceptor by being reversibly converted to its reduced form." [GOC:bf, ISBN:0198506732]	2	1879	1	18123	0.000532198	0.5	Higher in GroupD	['GO:0015883', 'GO:0098656', 'GO:1901679']
GO:BP	GO:0035337	fatty-acyl-CoA metabolic process	1	FALSE	"The chemical reactions and pathways involving a fatty-acyl-CoA, any derivative of coenzyme A in which the sulfhydryl group is in thiolester linkage with a fatty-acyl group." [ISBN:0198506732]	42	285	4	18123	0.0140351	0.0952381	Higher in GroupD	['GO:0006637', 'GO:1901568']
GO:BP	GO:0035696	monocyte extravasation	1	FALSE	"The migration of a monocyte from the blood vessels into the surrounding tissue." [CL:0000576, GOC:BHF, PMID:10657654]	8	790	1	18123	0.00126582	0.125	Higher in GroupD	['GO:0045123', 'GO:0071674', 'GO:0097529']
GO:BP	GO:0035700	astrocyte chemotaxis	1	FALSE	"The directed movement of an astrocyte guided by a specific chemical concentration gradient. Movement may be towards a higher concentration (positive chemotaxis) or towards a lower concentration (negative chemotaxis)." [CL:0000127, GOC:BHF, PMID:12271471]	2	1121	1	18123	0.000892061	0.5	Higher in GroupD	['GO:0043615', 'GO:0060326']
GO:BP	GO:0035306	positive regulation of dephosphorylation	1	FALSE	"Any process that activates or increases the frequency, rate or extent of removal of phosphate groups from a molecule." [GOC:bf]	58	1725	9	18123	0.00521739	0.155172	Higher in GroupD	['GO:0016311', 'GO:0035303', 'GO:0045937']
GO:BP	GO:0035709	memory T cell activation	1	FALSE	"The change in morphology and behavior of a memory T cell resulting from exposure to a mitogen, cytokine, chemokine, cellular ligand, or an antigen for which it is specific." [CL:0000813, GOC:BHF]	4	2475	1	18123	0.00040404	0.25	Higher in GroupD	['GO:0042110']
GO:BP	GO:0035720	intraciliary anterograde transport	1	FALSE	"The directed movement of large protein complexes along microtubules from the cell body toward the tip of a cilium (also called flagellum), mediated by motor proteins." [GOC:BHF, GOC:cilia, PMID:17895364]	3	1983	1	18123	0.000504286	0.333333	Higher in GroupD	['GO:0042073']
GO:BP	GO:0035722	interleukin-12-mediated signaling pathway	1	FALSE	"A series of molecular signals initiated by the binding of interleukin-12 to a receptor on the surface of a cell, and ending with regulation of a downstream cellular process, e.g. transcription." [GOC:BHF, GOC:signaling]	47	163	2	18123	0.0122699	0.0425532	Higher in GroupD	['GO:0019221', 'GO:0071349']
GO:BP	GO:0035305	negative regulation of dephosphorylation	1	FALSE	"Any process the stops, prevents, or reduces the frequency, rate or extent of removal of phosphate groups from a molecule." [GOC:bf]	118	1152	6	18123	0.00520833	0.0508475	Higher in GroupD	['GO:0016311', 'GO:0035303', 'GO:0045936']
GO:BP	GO:0035725	sodium ion transmembrane transport	1	FALSE	"A process in which a sodium ion is transported from one side of a membrane to the other by means of some agent such as a transporter or pore." [GOC:vw]	170	55	2	18123	0.0363636	0.0117647	Higher in GroupD	['GO:0006814', 'GO:0098662']
GO:BP	GO:0035726	common myeloid progenitor cell proliferation	1	FALSE	"The multiplication or reproduction of common myeloid progenitor cells, resulting in the expansion of a cell population. A common myeloid progenitor cell is a progenitor cell committed to the myeloid lineage." [CL:0000049, GOC:BHF]	7	2618	1	18123	0.000381971	0.142857	Higher in GroupD	['GO:0008283']
GO:BP	GO:0035304	regulation of protein dephosphorylation	1	FALSE	"Any process that modulates the frequency, rate or extent of removal of phosphate groups from a protein." [GOC:bf]	145	11	1	18123	0.0909091	0.00689655	Higher in GroupD	['GO:0006470', 'GO:0031399', 'GO:0035303']
GO:BP	GO:0035303	regulation of dephosphorylation	1	FALSE	"Any process that modulates the frequency, rate or extent of removal of phosphate groups from a molecule." [GOC:bf]	217	11	1	18123	0.0909091	0.00460829	Higher in GroupD	['GO:0016311', 'GO:0019220']
GO:BP	GO:0035728	response to hepatocyte growth factor	1	FALSE	"Any process that results in a change in state or activity of a cell or an organism (in terms of movement, secretion, enzyme production, gene expression, etc.) as a result of a hepatocyte growth factor stimulus." [GOC:bf]	20	2079	4	18123	0.001924	0.2	Higher in GroupD	['GO:0070848']
GO:BP	GO:0035729	cellular response to hepatocyte growth factor stimulus	1	FALSE	"Any process that results in a change in state or activity of a cell (in terms of movement, secretion, enzyme production, gene expression, etc.) as a result of a hepatocyte growth factor stimulus." [GOC:bf]	18	2079	3	18123	0.001443	0.166667	Higher in GroupD	['GO:0035728', 'GO:0071363']
GO:BP	GO:0035296	regulation of tube diameter	1	FALSE	"Any process that modulates the diameter of a tube." [GOC:bf]	136	42	1	18123	0.0238095	0.00735294	Higher in GroupD	['GO:0035150']
GO:BP	GO:0035295	tube development	1	FALSE	"The process whose specific outcome is the progression of a tube over time, from its initial formation to a mature structure. Epithelial and endothelial tubes transport gases, liquids and cells from one site to another and form the basic structure of many organs and tissues including lung and trachea, kidney, the mammary gland, the vascular system and the gastrointestinal and urinary-genital trac…	1158	101	14	18123	0.138614	0.0120898	Higher in GroupD	['GO:0007275', 'GO:0048856']
GO:BP	GO:0035733	hepatic stellate cell activation	1	FALSE	"A change in the morphology or behavior of a hepatic stellate cell resulting from exposure to a cytokine, chemokine, hormone, cellular ligand or soluble factor." [CL:0000632, GOC:bf]	8	2079	1	18123	0.000481	0.125	Higher in GroupD	['GO:0072537']
GO:BP	GO:0035284	brain segmentation	1	FALSE	"Division of the brain into a series of semi-repetitive parts or segments." [GOC:bf]	3	1497	2	18123	0.00133601	0.666667	Higher in GroupD	['GO:0007420', 'GO:0035282', 'GO:0035283']
GO:BP	GO:0035283	central nervous system segmentation	1	FALSE	"Division of the central nervous system into a series of semi-repetitive parts or segments." [GOC:bf]	3	1497	2	18123	0.00133601	0.666667	Higher in GroupD	['GO:0007417', 'GO:0035282']
GO:BP	GO:0035282	segmentation	1	FALSE	"The regionalization process that divides an organism or part of an organism into a series of semi-repetitive parts, or segments, often arranged along a longitudinal axis." [PMID:10611687, PMID:9706689]	101	851	7	18123	0.00822562	0.0693069	Higher in GroupD	['GO:0003002']
GO:BP	GO:0035281	pre-miRNA export from nucleus	1	FALSE	"Transport of pre-microRNAs (pre-miRNAs) from the nucleus to the cytoplasm. Pre-miRNAs are a ~60-70 nucleotide stem loop intermediate in miRNA production, produced by the nuclear cleavage of a primary miRNA (pri-mRNA) transcript. Pre-miRNAs are transported from the nucleus to the cytoplasm where further cleavage occurs to produce a mature miRNA product." [GOC:sl, PMID:14744438]	2	2533	1	18123	0.000394789	0.5	Higher in GroupD	['GO:0006405', 'GO:0035195']
GO:BP	GO:0035280	miRNA loading onto RISC involved in gene silencing by miRNA	1	FALSE	"The transfer of a microRNA (miRNA) strand from a miRNA:miRNA duplex onto the RNA-initiated silencing complex (RISC)." [PMID:14744438]	7	2607	1	18123	0.000383583	0.142857	Higher in GroupD	['GO:0035195', 'GO:0070922']
GO:BP	GO:0035735	intraciliary transport involved in cilium assembly	1	FALSE	"The bidirectional movement of large protein complexes along microtubules within a cilium that contributes to cilium assembly." [GOC:bf, GOC:cilia, Reactome:R-HSA-5620924.2]	40	446	1	18123	0.00224215	0.025	Higher in GroupD	['GO:0042073', 'GO:0060271']
GO:BP	GO:0035739	CD4-positive, alpha-beta T cell proliferation	1	FALSE	"The expansion of a CD4-positive, alpha-beta T cell population by cell division." [CL:0000624, GOC:BHF]	13	310	3	18123	0.00967742	0.230769	Higher in GroupD	['GO:0035710', 'GO:0046633']
GO:BP	GO:0035307	positive regulation of protein dephosphorylation	1	FALSE	"Any process that activates or increases the frequency, rate or extent of removal of phosphate groups from a protein." [GOC:bf]	44	1725	7	18123	0.00405797	0.159091	Higher in GroupD	['GO:0006470', 'GO:0031401', 'GO:0035304', 'GO:0035306']
GO:BP	GO:0035694	mitochondrial protein catabolic process	1	FALSE	"The chemical reactions and pathways resulting in the breakdown of a mitochondrial protein. This process is necessary to maintain the healthy state of mitochondria and is thought to occur via the induction of an intramitochondrial lysosome-like organelle that acts to eliminate the damaged oxidised mitochondrial proteins without destroying the mitochondrial structure." [GOC:sp, PMID:21264221, PMID…	6	756	2	18123	0.0026455	0.333333	Higher in GroupD	['GO:0007005', 'GO:0044257']
GO:BP	GO:0035308	negative regulation of protein dephosphorylation	1	FALSE	"Any process the stops, prevents, or reduces the frequency, rate or extent of removal of phosphate groups from a protein." [GOC:bf]	72	1152	4	18123	0.00347222	0.0555556	Higher in GroupD	['GO:0006470', 'GO:0031400', 'GO:0035304', 'GO:0035305']
GO:BP	GO:0035691	macrophage migration inhibitory factor signaling pathway	1	FALSE	"A series of molecular signals initiated by the binding of macrophage migration inhibitory factor to a receptor on the surface of a cell, and ending with regulation of a downstream cellular process, e.g. transcription." [GOC:BHF, GOC:signaling, PMID:12782713, PMID:19413900]	3	2007	1	18123	0.000498256	0.333333	Higher in GroupD	['GO:0019221']
GO:BP	GO:0035622	intrahepatic bile duct development	1	FALSE	"The progression of the intrahepatic bile ducts over time, from their formation to the mature structure. Intrahepatic bile ducts (bile ducts within the liver) collect bile from bile canaliculi in the liver, and connect to the extrahepatic bile ducts (bile ducts outside the liver)." [GOC:bf, PMID:20614624]	2	974	1	18123	0.00102669	0.5	Higher in GroupD	['GO:0001889', 'GO:0061009']
GO:BP	GO:0035624	receptor transactivation	1	FALSE	"The process in which a receptor is activated by another receptor. Receptor transactivation can occur through different mechanisms and includes cross-talk between signaling pathways where one receptor activates a receptor for a different ligand, and also activation of subunits within a receptor oligomer." [GOC:al, GOC:bf, GOC:BHF, PMID:16870826, PMID:21063387]	5	1448	2	18123	0.00138122	0.4	Higher in GroupD	['GO:2000273']
GO:BP	GO:0035627	ceramide transport	1	FALSE	"The directed movement of ceramides into, out of or within a cell, or between cells, by means of some agent such as a transporter or pore. Ceramides are a class of lipid composed of sphingosine linked to a fatty acid." [GOC:bf, GOC:sart]	15	679	1	18123	0.00147275	0.0666667	Higher in GroupD	['GO:0006869', 'GO:0042886']
GO:BP	GO:0035336	long-chain fatty-acyl-CoA metabolic process	1	FALSE	"The chemical reactions and pathways involving long-chain fatty-acyl-CoAs, any derivative of coenzyme A in which the sulfhydryl group is in a thioester linkage with a long-chain fatty-acyl group. Long-chain fatty-acyl-CoAs have chain lengths of C13 or more." [ISBN:0198506732]	25	67	2	18123	0.0298507	0.08	Higher in GroupD	['GO:0035337']
GO:BP	GO:0035335	peptidyl-tyrosine dephosphorylation	1	FALSE	"The removal of phosphoric residues from peptidyl-O-phospho-tyrosine to form peptidyl-tyrosine." [GOC:bf]	105	713	11	18123	0.0154278	0.104762	Higher in GroupD	['GO:0006470']
GO:BP	GO:0035333	Notch receptor processing, ligand-dependent	1	FALSE	"The proteolytic cleavages to the Notch protein that occur as a result of ligand binding. Ligand binding at the cell surface exposes an otherwise inaccessible cleavage site in the extracellular portion of Notch, which when cleaved releases a membrane-tethered form of the Notch intracellular domain. Subsequent cleavage within the transmembrane domain then leads to the release of the soluble Notch …	7	2209	2	18123	0.000905387	0.285714	Higher in GroupD	['GO:0007219', 'GO:0007220', 'GO:0031293']
GO:BP	GO:0035332	positive regulation of hippo signaling	1	FALSE	"Any process that activates or increases the frequency, rate or extent of hippo signaling." [GOC:bf]	5	2081	1	18123	0.000480538	0.2	Higher in GroupD	['GO:0035329', 'GO:0035330', 'GO:1902533']
GO:BP	GO:0035630	bone mineralization involved in bone maturation	1	FALSE	"The deposition of hydroxyapatite, involved in the progression of the skeleton from its formation to its mature state." [GOC:bf, GOC:BHF]	13	2557	2	18123	0.000782167	0.153846	Higher in GroupD	['GO:0030282', 'GO:0043931']
GO:BP	GO:0035633	maintenance of blood-brain barrier	1	FALSE	"Maintaining the structure and function of the blood-brain barrier, thus ensuring specific regulated transport of substances (e.g. macromolecules, small molecules, ions) into the brain, and out of the brain into the blood circulation." [GOC:aruk, GOC:bc, GOC:bf, GOC:sl, PMID:20080302, PMID:30280653]	35	794	5	18123	0.00629723	0.142857	Higher in GroupD	['GO:0001894']
GO:BP	GO:0035635	entry of bacterium into host cell	1	FALSE	"The process in which a bacterium enters a host cell. The host is defined as the larger of the organisms involved in a symbiotic interaction." [GOC:bf, PMID:21187937]	15	1774	3	18123	0.00169109	0.2	Higher in GroupD	['GO:0044409']
GO:BP	GO:0035637	multicellular organismal signaling	1	FALSE	"The transfer of information occurring at the level of a multicellular organism." [GOC:go_curators]	200	21	1	18123	0.047619	0.005	Higher in GroupD	['GO:0023052', 'GO:0032501']
GO:BP	GO:0035338	long-chain fatty-acyl-CoA biosynthetic process	1	FALSE	"The chemical reactions and pathways resulting in the formation of a long-chain fatty-acyl-CoA any derivative of coenzyme A in which the sulfhydryl group is in a thioester linkage with a long-chain fatty-acyl group. Long-chain fatty-acyl-CoAs have chain lengths of C13 or more." [ISBN:0198506732]	19	67	2	18123	0.0298507	0.105263	Higher in GroupD	['GO:0035336', 'GO:0046949']
GO:BP	GO:0035640	exploration behavior	1	FALSE	"The specific behavior of an organism in response to a novel environment or stimulus." [GOC:BHF, GOC:pr, PMID:11682103, PMID:9767169]	23	832	3	18123	0.00360577	0.130435	Higher in GroupD	['GO:0007610']
GO:BP	GO:0035655	interleukin-18-mediated signaling pathway	1	FALSE	"A series of molecular signals initiated by the binding of interleukin-18 to a receptor on the surface of a cell, and ending with regulation of a downstream cellular process, e.g. transcription." [GOC:bf, GOC:BHF, GOC:signaling]	8	537	1	18123	0.0018622	0.125	Higher in GroupD	['GO:0019221', 'GO:0071351']
GO:BP	GO:0035666	TRIF-dependent toll-like receptor signaling pathway	1	FALSE	"Any series of molecular signals generated as a consequence of binding to a toll-like receptor where the TRIF adaptor mediates transduction of the signal. Toll-like receptors directly bind pattern motifs from a variety of microbial sources to initiate innate immune response." [GOC:BHF, PMID:12855817]	30	1	1	18123	1	0.0333333	Higher in GroupD	['GO:0002756']
GO:BP	GO:0035672	oligopeptide transmembrane transport	1	FALSE	"The process in which an oligopeptide is transported across a membrane. Oligopeptides are molecules that contain a small number (2 to 20) of amino-acid residues connected by peptide linkages." [GOC:vw, ISBN:0198506732]	13	1696	2	18123	0.00117925	0.153846	Higher in GroupD	['GO:0006857', 'GO:0055085']
GO:BP	GO:0035683	memory T cell extravasation	1	FALSE	"The migration of a memory T cell from the blood vessels into the surrounding tissue. A memory T cell is a distinctly differentiated long-lived T cell that has the phenotype CD45RO-positive and CD127-positive." [CL:0000813, GOC:BHF]	2	2419	1	18123	0.000413394	0.5	Higher in GroupD	['GO:0072683']
GO:BP	GO:0035331	negative regulation of hippo signaling	1	FALSE	"Any process that stops, prevents, or reduces the frequency, rate or extent of hippo signaling." [GOC:bf]	13	248	3	18123	0.0120968	0.230769	Higher in GroupD	['GO:0035329', 'GO:0035330', 'GO:1902532']
GO:BP	GO:0035330	regulation of hippo signaling	1	FALSE	"Any process that modulates the frequency, rate or extent of hippo signaling." [GOC:bf]	20	248	3	18123	0.0120968	0.15	Higher in GroupD	['GO:0035329', 'GO:1902531']
GO:BP	GO:0035315	hair cell differentiation	1	FALSE	"The process in which a relatively unspecialized cell acquires specialized features of a hair cell." [GOC:bf]	49	590	2	18123	0.00338983	0.0408163	Higher in GroupD	['GO:0009913', 'GO:0030182']
GO:BP	GO:0035313	wound healing, spreading of epidermal cells	1	FALSE	"The migration of an epidermal cell along or through a wound gap that contributes to the reestablishment of a continuous epidermis." [GOC:bf, PMID:15269788]	19	59	2	18123	0.0338983	0.105263	Higher in GroupD	['GO:0044319']
GO:BP	GO:0035684	helper T cell extravasation	1	FALSE	"The migration of a helper T cell from the blood vessels into the surrounding tissue. A helper T-cell is an effector T cell that provides help in the form of secreted cytokines to other immune cells." [CL:0000912, GOC:BHF]	3	1188	2	18123	0.0016835	0.666667	Higher in GroupD	['GO:0072683']
GO:BP	GO:0035685	helper T cell diapedesis	1	FALSE	"The passage of a helper T cell between the tight junctions of endothelial cells lining blood vessels, typically the fourth and final step of cellular extravasation." [CL:0000912, GOC:BHF]	2	1188	2	18123	0.0016835	1	Higher in GroupD	['GO:0035684', 'GO:0050904', 'GO:0072678']
GO:BP	GO:0035690	cellular response to drug	1	FALSE	"Any process that results in a change in state or activity of a cell (in terms of movement, secretion, enzyme production, gene expression, etc.) as a result of a drug stimulus. A drug is a substance used in the diagnosis, treatment or prevention of a disease." [GOC:sl]	70	986	10	18123	0.010142	0.142857	Higher in GroupD	['GO:0042493', 'GO:0070887']
GO:BP	GO:0035641	locomotory exploration behavior	1	FALSE	"The specific movement from place to place of an organism in response to a novel environment." [GOC:sart, PMID:17151232]	14	832	2	18123	0.00240385	0.142857	Higher in GroupD	['GO:0007626', 'GO:0035640']
GO:BP	GO:0035329	hippo signaling	1	FALSE	"The series of molecular signals mediated by the serine/threonine kinase Hippo or one of its orthologs. In Drosophila, Hippo in complex with the scaffold protein Salvador (Sav), phosphorylates and activates Warts (Wts), which in turn phosphorylates and inactivates the Yorkie (Yki) transcriptional activator. The core fly components hippo, sav, wts and mats are conserved in mammals as STK4/3 (MST1/…	47	248	4	18123	0.016129	0.0851064	Higher in GroupD	['GO:0035556']
GO:BP	GO:0036303	lymph vessel morphogenesis	1	FALSE	"The process in which the anatomical structures of lymph vessels are generated and organized. The lymph vessel is the vasculature carrying lymph." [GOC:BHF, GOC:gr, PMID:18093989]	22	680	4	18123	0.00588235	0.181818	Higher in GroupD	['GO:0001945', 'GO:0009653']
GO:BP	GO:0035795	negative regulation of mitochondrial membrane permeability	1	FALSE	"Any process that decreases the frequency, rate or extent of the passage or uptake of molecules by the mitochondrial membrane." [PMID:10781072]	9	864	2	18123	0.00231481	0.222222	Higher in GroupD	['GO:0046902', 'GO:1905709']
GO:BP	GO:0040009	regulation of growth rate	1	FALSE	"Any process that modulates the rate of growth of all or part of an organism." [GOC:mah]	8	2358	2	18123	0.000848176	0.25	Higher in GroupD	['GO:0040008']
GO:BP	GO:0040008	regulation of growth	1	FALSE	"Any process that modulates the frequency, rate or extent of the growth of all or part of an organism so that it occurs at its proper speed, either globally or in a specific part of the organism's development." [GOC:ems, GOC:mah]	680	353	21	18123	0.0594901	0.0308824	Higher in GroupD	['GO:0040007', 'GO:0050789']
GO:BP	GO:0040007	growth	1	FALSE	"The increase in size or mass of an entire organism, a part of an organism or a cell." [GOC:bf, GOC:ma]	973	74	7	18123	0.0945946	0.00719424	Higher in GroupD	['GO:0008150']
GO:BP	GO:0040001	establishment of mitotic spindle localization	1	FALSE	"The cell cycle process in which the directed movement of the mitotic spindle to a specific location in the cell occurs." [GOC:ai]	36	1998	6	18123	0.003003	0.166667	Higher in GroupD	['GO:0051293', 'GO:1902850']
GO:BP	GO:0039702	viral budding via host ESCRT complex	1	FALSE	"Viral budding which uses a host ESCRT protein complex, or complexes, to mediate the budding process." [UniProtKB-KW:KW-1187, VZ:1536]	21	2559	2	18123	0.000781555	0.0952381	Higher in GroupD	['GO:0046755']
GO:BP	GO:0039694	viral RNA genome replication	1	FALSE	"The replication of a viral RNA genome." [GOC:bf, GOC:jl]	36	2155	6	18123	0.00278422	0.166667	Higher in GroupD	['GO:0019079']
GO:BP	GO:0040011	locomotion	1	FALSE	"Self-propelled movement of a cell or organism from one location to another." [GOC:dgh]	2039	83	20	18123	0.240964	0.00980873	Higher in GroupD	['GO:0008150']
GO:BP	GO:0039692	single stranded viral RNA replication via double stranded DNA intermediate	1	FALSE	"A viral genome replication where the template is single-stranded RNA (ssRNA), and which proceeds via a double stranded DNA (dsDNA) intermediate molecule. Viral genomic RNA is first reverse transcribed into dsDNA, which integrates into the host chromosomal DNA, where it is transcribed by host RNA polymerase II." [GOC:bf, GOC:jl, ISBN:0198506732, VZ:1937]	20	1774	1	18123	0.000563698	0.05	Higher in GroupD	['GO:0039694']
GO:BP	GO:0039656	modulation by virus of host gene expression	1	FALSE	"The process in which a virus effects a change in gene expression in its host organism. Gene expression is the process in which a gene's coding sequence is converted into a mature gene product or products (proteins or RNA). This includes the production of an RNA transcript as well as any processing to produce a mature RNA product or an mRNA (for protein-coding genes) and the translation of that m…	3	2113	2	18123	0.000946522	0.666667	Higher in GroupD	['GO:0010467', 'GO:0019048']
GO:BP	GO:0039650	suppression by virus of host cysteine-type endopeptidase activity involved in apoptotic process	1	FALSE	"Any process in which a virus stops, prevents, or reduces the frequency, rate or extent of host caspase activity. Caspases are cysteine-type endopeptidases which contribute to the apoptotic process." [UniProtKB-KW:KW-1085, VZ:912]	1	1602	1	18123	0.00062422	1	Higher in GroupD	['GO:0019050', 'GO:0039513']
GO:BP	GO:0039536	negative regulation of RIG-I signaling pathway	1	FALSE	"Any process that stops, prevents, or reduces the frequency, rate or extent of the series of molecular signals generated as a consequence of the cytoplasmic pattern recognition receptor (PRR) RIG-1 (also known as DDX58) binding to viral RNA." [GOC:bf, GOC:jl]	8	1242	2	18123	0.00161031	0.25	Higher in GroupD	['GO:0039529', 'GO:0039532', 'GO:0039535']
GO:BP	GO:0039535	regulation of RIG-I signaling pathway	1	FALSE	"Any process that modulates the frequency, rate or extent of the series of molecular signals generated as a consequence of the cytoplasmic pattern recognition receptor (PRR) RIG-1 (also known as DDX58) binding to viral RNA." [GOC:bf, GOC:jl]	21	1461	7	18123	0.00479124	0.333333	Higher in GroupD	['GO:0039529', 'GO:0039531']
GO:BP	GO:0039534	negative regulation of MDA-5 signaling pathway	1	FALSE	"Any process that stops, prevents, or reduces the frequency, rate or extent of the series of molecular signals generated as a consequence of the cytoplasmic pattern recognition receptor (PRR) MDA-5 (also known as IFIH1) binding to viral RNA." [GOC:bf, GOC:jl]	4	1218	1	18123	0.000821018	0.25	Higher in GroupD	['GO:0039530', 'GO:0039532', 'GO:0039533']
GO:BP	GO:0039533	regulation of MDA-5 signaling pathway	1	FALSE	"Any process that modulates the frequency, rate or extent of the series of molecular signals generated as a consequence of the cytoplasmic pattern recognition receptor (PRR) MDA-5 (also known as IFIH1) binding to viral RNA." [GOC:bf, GOC:jl]	7	1218	1	18123	0.000821018	0.142857	Higher in GroupD	['GO:0039530', 'GO:0039531']
GO:BP	GO:0039689	negative stranded viral RNA replication	1	FALSE	"A viral genome replication process where the template genome is negative stranded, single stranded RNA ((-)ssRNA)." [GOC:bf, GOC:jl, VZ:1096]	3	927	1	18123	0.00107875	0.333333	Higher in GroupD	['GO:0039694']
GO:BP	GO:0040013	negative regulation of locomotion	1	FALSE	"Any process that stops, prevents, or reduces the frequency, rate or extent of locomotion of a cell or organism." [GOC:go_curators]	408	353	14	18123	0.0396601	0.0343137	Higher in GroupD	['GO:0040011', 'GO:0040012', 'GO:0048519']
GO:BP	GO:0040014	regulation of multicellular organism growth	1	FALSE	"Any process that modulates the frequency, rate or extent of growth of the body of an organism so that it reaches its usual body size." [GOC:dph, GOC:ems, GOC:tb]	64	42	2	18123	0.047619	0.03125	Higher in GroupD	['GO:0035264', 'GO:0048638', 'GO:0051239']
GO:BP	GO:0040016	embryonic cleavage	1	FALSE	"The first few specialized divisions of an activated animal egg." [GOC:clt, ISBN:0070524300]	7	2089	1	18123	0.000478698	0.142857	Higher in GroupD	['GO:0009790', 'GO:0051301']
GO:BP	GO:0042053	regulation of dopamine metabolic process	1	FALSE	"Any process that modulates the frequency, rate or extent of the chemical reactions and pathways involving dopamine." [GOC:go_curators]	17	2410	1	18123	0.000414938	0.0588235	Higher in GroupD	['GO:0042069', 'GO:0042417']
GO:BP	GO:0042048	olfactory behavior	1	FALSE	"The behavior of an organism in response to an odor." [GOC:jid, GOC:pr]	9	151	1	18123	0.00662252	0.111111	Higher in GroupD	['GO:0007635']
GO:BP	GO:0042045	epithelial fluid transport	1	FALSE	"The directed movement of fluid across epithelia." [GOC:jl, PMID:11390830]	10	1861	4	18123	0.00214938	0.4	Higher in GroupD	['GO:0042044', 'GO:0070633']
GO:BP	GO:0042044	fluid transport	1	FALSE	"The directed movement of substances that are in liquid form in normal living conditions into, out of or within a cell, or between cells, by means of some agent such as a transporter or pore." [GOC:ai]	33	1891	5	18123	0.0026441	0.151515	Higher in GroupD	['GO:0006810']
GO:BP	GO:0042026	protein refolding	1	FALSE	"The process carried out by a cell that restores the biological activity of an unfolded or misfolded protein, using helper proteins such as chaperones." [GOC:mb]	23	776	2	18123	0.00257732	0.0869565	Higher in GroupD	['GO:0006457']
GO:BP	GO:0042023	DNA endoreduplication	1	FALSE	"Regulated re-replication of DNA within a single cell cycle, resulting in an increased cell ploidy. An example of this process occurs in the synthesis of Drosophila salivary gland cell polytene chromosomes." [GOC:jl, GOC:vw]	4	2297	2	18123	0.000870701	0.5	Higher in GroupD	['GO:0044786']
GO:BP	GO:0040037	negative regulation of fibroblast growth factor receptor signaling pathway	1	FALSE	"Any process that stops, prevents, or reduces the frequency, rate or extent of fibroblast growth factor receptor signaling pathway activity." [GOC:go_curators]	26	2658	6	18123	0.00225734	0.230769	Higher in GroupD	['GO:0008543', 'GO:0009968', 'GO:0040036', 'GO:0090288']
GO:BP	GO:0040036	regulation of fibroblast growth factor receptor signaling pathway	1	FALSE	"Any process that modulates the frequency, rate or extent of fibroblast growth factor receptor signaling pathway activity." [GOC:go_curators]	40	2120	6	18123	0.00283019	0.15	Higher in GroupD	['GO:0008543', 'GO:0009966', 'GO:0090287']
GO:BP	GO:0040033	negative regulation of translation, ncRNA-mediated	1	FALSE	"Any process, mediated by small non-coding RNAs, that stops, prevents or reduces the rate that mRNAs are effectively translated into protein." [GOC:dph, GOC:ems, GOC:tb]	105	219	2	18123	0.00913242	0.0190476	Higher in GroupD	['GO:0017148', 'GO:0045974']
GO:BP	GO:0040031	snRNA modification	1	FALSE	"The covalent alteration of one or more nucleotides within snRNA, resulting in a change in the properties of the snRNA." [GOC:jl]	7	1362	2	18123	0.00146843	0.285714	Higher in GroupD	['GO:0009451', 'GO:0016073']
GO:BP	GO:0040029	regulation of gene expression, epigenetic	1	FALSE	"Any process that modulates the frequency, rate or extent of gene expression; the process is mitotically or meiotically heritable, or is stably self-propagated in the cytoplasm of a resting cell, and does not entail a change in DNA sequence." [PMID:10521337, PMID:11498582]	205	581	7	18123	0.0120482	0.0341463	Higher in GroupD	['GO:0010468']
GO:BP	GO:0040020	regulation of meiotic nuclear division	1	FALSE	"Any process that modulates the frequency, rate or extent of meiotic nuclear division, the process in which the nucleus of a diploid cell divides twice forming four haploid cells, one or more of which usually function as gametes." [GOC:ems, GOC:ma]	33	146	1	18123	0.00684932	0.030303	Higher in GroupD	['GO:0010564', 'GO:0051445', 'GO:0051783', 'GO:0140013']
GO:BP	GO:0040019	positive regulation of embryonic development	1	FALSE	"Any process that activates or increases the frequency, rate or extent of embryonic development." [GOC:go_curators]	23	2444	2	18123	0.000818331	0.0869565	Higher in GroupD	['GO:0009790', 'GO:0045995', 'GO:0051094', 'GO:0051240']
GO:BP	GO:0040018	positive regulation of multicellular organism growth	1	FALSE	"Any process that activates or increases the frequency, rate or extent of growth of an organism to reach its usual body size." [GOC:dph, GOC:go_curators, GOC:tb]	31	897	3	18123	0.00334448	0.0967742	Higher in GroupD	['GO:0035264', 'GO:0040014', 'GO:0048639', 'GO:0051240']
GO:BP	GO:0040017	positive regulation of locomotion	1	FALSE	"Any process that activates or increases the frequency, rate or extent of locomotion of a cell or organism." [GOC:go_curators]	607	81	10	18123	0.123457	0.0164745	Higher in GroupD	['GO:0040011', 'GO:0040012', 'GO:0048518']
GO:BP	GO:0039532	negative regulation of viral-induced cytoplasmic pattern recognition receptor signaling pathway	1	FALSE	"Any process that stops, prevents, or reduces the frequency, rate or extent of the series of molecular signals generated as a consequence of a virus or viral RNA binding to a pattern recognition receptor (PRR) located in the cytoplasm." [GOC:bf, GOC:jl]	11	2000	3	18123	0.0015	0.272727	Higher in GroupD	['GO:0039528', 'GO:0039531', 'GO:0050687', 'GO:1902532']
GO:BP	GO:0039531	regulation of viral-induced cytoplasmic pattern recognition receptor signaling pathway	1	FALSE	"Any process that modulates the frequency, rate or extent of the series of molecular signals generated as a consequence of a virus or viral RNA binding to a pattern recognition receptor (PRR) located in the cytoplasm." [GOC:bf, GOC:jl]	25	1	1	18123	1	0.04	Higher in GroupD	['GO:0002831', 'GO:0032101', 'GO:0039528', 'GO:0062207', 'GO:1902531']
GO:BP	GO:0039530	MDA-5 signaling pathway	1	FALSE	"Any series of molecular signals generated as a consequence of the cytoplasmic pattern recognition receptor (PRR) MDA-5 (also known as IFIH1) binding to viral RNA. MDA-5 detects RNA synthesized during active viral replication and triggers a signaling pathway to protect the host against viral infection, for example by inducing the expression of antiviral cytokines." [GOC:bf, PMID:19620789]	11	1218	1	18123	0.000821018	0.0909091	Higher in GroupD	['GO:0039528']
GO:BP	GO:0039529	RIG-I signaling pathway	1	FALSE	"Any series of molecular signals generated as a consequence of the cytoplasmic pattern recognition receptor (PRR) RIG-1 (also known as DDX58) binding to viral RNA. RIG-I detects RNA synthesized during active viral replication and triggers a signaling pathway to protect the host against viral infection, for example by inducing the expression of antiviral cytokines." [GOC:bf, PMID:17328678, PMID:19…	28	1461	8	18123	0.0054757	0.285714	Higher in GroupD	['GO:0039528']
GO:BP	GO:0038161	prolactin signaling pathway	1	FALSE	"A series of molecular signals initiated by the binding of the peptide hormone prolactin to a receptor on the surface of a cell, and ending with regulation of a downstream cellular process, e.g. transcription." [GOC:nhn, GOC:signaling, PMID:21664429]	1	12	1	18123	0.0833333	1	Higher in GroupD	['GO:0009755', 'GO:0019221']
GO:BP	GO:0038158	granulocyte colony-stimulating factor signaling pathway	1	FALSE	"A series of molecular signals initiated by the binding of the cytokine granulocyte colony-stimulating factor (G-CSF) to a receptor on the surface of a cell, and ending with regulation of a downstream cellular process, e.g. transcription. G-CSF binds to the receptor (CSF3R)." [GOC:nhn, GOC:signaling]	2	2618	1	18123	0.000381971	0.5	Higher in GroupD	['GO:0019221']
GO:BP	GO:0038155	interleukin-23-mediated signaling pathway	1	FALSE	"A series of molecular signals initiated by the binding of interleukin-23 to a receptor on the surface of a cell, and ending with regulation of a downstream cellular process, e.g. transcription." [GOC:nhn, GOC:signaling]	9	1086	2	18123	0.00184162	0.222222	Higher in GroupD	['GO:0019221']
GO:BP	GO:0038154	interleukin-11-mediated signaling pathway	1	FALSE	"A series of molecular signals initiated by the binding of interleukin-11 to a receptor on the surface of a cell, and ending with regulation of a downstream cellular process, e.g. transcription." [GOC:nhn, GOC:signaling]	3	5	1	18123	0.2	0.333333	Higher in GroupD	['GO:0019221']
GO:BP	GO:0038145	macrophage colony-stimulating factor signaling pathway	1	FALSE	"A series of molecular signals initiated by the binding of the cytokine macrophage colony-stimulating factor (M-CSF) to a receptor on the surface of a cell, and ending with regulation of a downstream cellular process, e.g. transcription." [GOC:signaling, GOC:uh, PMID:12138890, Wikipedia:Macrophage_colony-stimulating_factor]	6	1386	2	18123	0.001443	0.333333	Higher in GroupD	['GO:0019221', 'GO:0036006']
GO:BP	GO:0038130	ERBB4 signaling pathway	1	FALSE	"A series of molecular signals initiated by binding of a ligand to the tyrosine kinase receptor ERBB4 on the surface of a cell. The pathway ends with regulation of a downstream cellular process, e.g. transcription." [GOC:jc, PMID:16460914, Reactome:R-HSA-1236394]	2	353	1	18123	0.00283286	0.5	Higher in GroupD	['GO:0038127']
GO:BP	GO:0038129	ERBB3 signaling pathway	1	FALSE	"A series of molecular signals initiated by binding of a ligand to the tyrosine kinase receptor ERBB3 on the surface of a cell. The pathway ends with regulation of a downstream cellular process, e.g. transcription. ERBB3 receptors have impaired kinase activity and rely on the kinase activity of the heterodimer partner for activation and signal transmission." [GOC:jc, PMID:16460914, Reactome:R-HSA…	3	353	1	18123	0.00283286	0.333333	Higher in GroupD	['GO:0038127']
GO:BP	GO:0038128	ERBB2 signaling pathway	1	FALSE	"A series of molecular signals initiated by binding of a ligand to a member of the ERBB family of receptors on the surface of a cell, where the signal is transmitted by ERBB2. The pathway ends with regulation of a downstream cellular process, e.g. transcription. ERBB2 receptors are themselves unable to bind to ligands, but act as a signal-amplifying tyrosine kinase within a heterodimeric pair." […	32	353	4	18123	0.0113314	0.125	Higher in GroupD	['GO:0038127']
GO:BP	GO:0038127	ERBB signaling pathway	1	FALSE	"A series of molecular signals initiated by binding of a ligand to a member of the ERBB family of receptor tyrosine kinases on the surface of a cell, and ending with regulation of a downstream cellular process, e.g. transcription." [GOC:jc, PMID:16460914, Wikipedia:ErbB]	146	353	6	18123	0.0169972	0.0410959	Higher in GroupD	['GO:0007169']
GO:BP	GO:0038124	toll-like receptor TLR6:TLR2 signaling pathway	1	FALSE	"A series of molecular signals initiated by the binding of a heterodimeric TLR6:TLR2 complex to one of it's physiological ligands, followed by transmission of the signal by the activated receptor, and ending with regulation of a downstream cellular process, e.g. transcription." [GOC:nhn, GOC:signaling, PMID:17318230]	4	2465	2	18123	0.000811359	0.5	Higher in GroupD	['GO:0002224']
GO:BP	GO:0038123	toll-like receptor TLR1:TLR2 signaling pathway	1	FALSE	"A series of molecular signals initiated by the binding of a heterodimeric TLR1:TLR2 complex to one of it's physiological ligands, followed by transmission of the signal by the activated receptor, and ending with regulation of a downstream cellular process, e.g. transcription." [GOC:nhn, GOC:signaling, PMID:17318230]	4	1897	1	18123	0.000527148	0.25	Higher in GroupD	['GO:0002224']
GO:BP	GO:0038114	interleukin-21-mediated signaling pathway	1	FALSE	"A series of molecular signals initiated by the binding of interleukin-21 to a receptor on the surface of a cell, and ending with regulation of a downstream cellular process, e.g. transcription." [GOC:nhn, GOC:signaling]	8	1086	1	18123	0.00092081	0.125	Higher in GroupD	['GO:0019221', 'GO:0098757']
GO:BP	GO:0038111	interleukin-7-mediated signaling pathway	1	FALSE	"A series of molecular signals initiated by the binding of interleukin-7 to a receptor on the surface of a cell, and ending with regulation of a downstream cellular process, e.g. transcription." [GOC:nhn, GOC:signaling]	30	2140	1	18123	0.00046729	0.0333333	Higher in GroupD	['GO:0019221', 'GO:0098761']
GO:BP	GO:0038110	interleukin-2-mediated signaling pathway	1	FALSE	"A series of molecular signals initiated by the binding of interleukin-2 to a receptor on the surface of a cell, and ending with regulation of a downstream cellular process, e.g. transcription." [GOC:nhn, GOC:signaling]	12	1011	1	18123	0.00098912	0.0833333	Higher in GroupD	['GO:0019221', 'GO:0071352']
GO:BP	GO:0038098	sequestering of BMP from receptor via BMP binding	1	FALSE	"Binding to a bone morphogenetic protein (BMP) in the extracellular region, and inhibiting BMP signaling by preventing BMP from binding to its cell surface receptor." [GOC:bf, GOC:signaling, PMID:19855014]	8	279	1	18123	0.00358423	0.125	Higher in GroupD	['GO:0030514', 'GO:0035581']
GO:BP	GO:0038165	oncostatin-M-mediated signaling pathway	1	FALSE	"A series of molecular signals initiated by the binding of oncostatin-M (OSM) to a receptor on the surface of a cell, and ending with regulation of a downstream cellular process, e.g. transcription. OSM can signal via at least two different receptors (a specific receptor and a LIF receptor) to activate different downstream signal transduction pathways." [GOC:nhn, GOC:signaling, PMID:10579456, PMI…	7	12	1	18123	0.0833333	0.142857	Higher in GroupD	['GO:0019221']
GO:BP	GO:0042058	regulation of epidermal growth factor receptor signaling pathway	1	FALSE	"Any process that modulates the frequency, rate or extent of epidermal growth factor receptor signaling pathway activity." [GOC:go_curators]	90	59	2	18123	0.0338983	0.0222222	Higher in GroupD	['GO:0007173', 'GO:1901184']
GO:BP	GO:0038171	cannabinoid signaling pathway	1	FALSE	"The series of molecular signals generated as a consequence of a cannabinoid binding to a cell surface receptor. The pathway proceeds with the receptor transmitting the signal to a heterotrimeric G-protein complex and ends with regulation of a downstream cellular process, e.g. transcription. Cannabinoids are a class of diverse chemical compounds that include the endocannabinoids and the phytocann…	9	102	1	18123	0.00980392	0.111111	Higher in GroupD	['GO:0007186']
GO:BP	GO:0038178	complement component C5a signaling pathway	1	FALSE	"A series of molecular signals generated as a consequence of a the C5a component of the complement pathway binding to a complement receptor, and ending with regulation of a downstream cellular process. C5a is a peptide derived from the C5 complement factor." [GOC:jc, PMID:15313431, Wikipedia:Complement_component_5a]	2	1980	1	18123	0.000505051	0.5	Higher in GroupD	['GO:0002430', 'GO:0007186']
GO:BP	GO:0039528	cytoplasmic pattern recognition receptor signaling pathway in response to virus	1	FALSE	"Any series of molecular signals generated as a consequence of a virus or viral RNA binding to a pattern recognition receptor (PRR) located in the cytoplasm. Cytosolic PRRs such as RIG-I (DDX58) and MDA-5 (IFIH1) detect RNA synthesized during active viral replication and trigger a signaling pathway to protect the host against viral infection, for example by inducing the expression of antiviral cy…	35	1	1	18123	1	0.0285714	Higher in GroupD	['GO:0002753', 'GO:0051607', 'GO:0098586']
GO:BP	GO:0039526	modulation by virus of host apoptotic process	1	FALSE	"Any process in which a virus modulates the frequency, rate or extent of apoptosis of infected host cells." [GOC:bf, GOC:mtg_apoptosis, GOC:sp, UniProtKB-KW:KW-1119]	4	2063	3	18123	0.00145419	0.75	Higher in GroupD	['GO:0019054', 'GO:0052150']
GO:BP	GO:0039521	suppression by virus of host autophagy	1	FALSE	"Any process in which a virus stops, prevents, or reduces the frequency, rate or extent of autophagy in the host." [GOC:bf, GOC:sp, UniProtKB-KW:KW-1083, VZ:845]	1	1730	1	18123	0.000578035	1	Higher in GroupD	['GO:0010507', 'GO:0039519', 'GO:0140321']
GO:BP	GO:0039519	modulation by virus of host autophagy	1	FALSE	"Any process in which a virus effect a change in the frequency, rate or extent of autophagy in the host." [GOC:bf, GOC:sp]	3	1730	1	18123	0.000578035	0.333333	Higher in GroupD	['GO:0010506', 'GO:0019054', 'GO:0052040', 'GO:0075071', 'GO:1904092']
GO:BP	GO:0039516	modulation by virus of host catalytic activity	1	FALSE	"The process in which a virus effects a change in host enzyme activity." [GOC:bf, GOC:sp]	1	1602	1	18123	0.00062422	1	Higher in GroupD	['GO:0039506', 'GO:0052148']
GO:BP	GO:0039513	suppression by virus of host catalytic activity	1	FALSE	"Any process in which a virus stops, prevents, or reduces the frequency, rate or extent of host enzyme activity." [GOC:bf]	1	1602	1	18123	0.00062422	1	Higher in GroupD	['GO:0039507', 'GO:0039516', 'GO:0052053']
GO:BP	GO:0039507	suppression by virus of host molecular function	1	FALSE	"Any process in which a virus stops, prevents, or reduces the frequency, rate or extent of the functional activity of a host protein." [GOC:bf, GOC:sp]	2	1602	1	18123	0.00062422	0.5	Higher in GroupD	['GO:0039506', 'GO:0052056']
GO:BP	GO:0039506	modulation by virus of host molecular function	1	FALSE	"The process in which a virus effects a change in the function of a host protein via a direct interaction." [GOC:bf, GOC:sp]	2	1602	1	18123	0.00062422	0.5	Higher in GroupD	['GO:0019048', 'GO:0052055']
GO:BP	GO:0038202	TORC1 signaling	1	FALSE	"A series of intracellular molecular signals mediated by TORC1; TOR (target of rapamycin) in complex with at least Raptor (regulatory-associated protein of TOR), or orthologs of, and other signaling components." [GOC:lb]	47	2611	1	18123	0.000382995	0.0212766	Higher in GroupD	['GO:0031929']
GO:BP	GO:0038195	urokinase plasminogen activator signaling pathway	1	FALSE	"A series of molecular signals initiated by the binding of urokinase plasminogen activator to a receptor on the surface of a target cell, and ending with regulation of a downstream cellular process, e.g. transcription." [GOC:gap, PMID:9417082]	2	1674	1	18123	0.000597372	0.5	Higher in GroupD	['GO:0007166']
GO:BP	GO:0038190	VEGF-activated neuropilin signaling pathway	1	FALSE	"A series of molecular signals initiated by the binding of vascular endothelial growth factor (VEGF) to a neuropilin protein on the surface of a target cell, followed by transmission of the signal, and ending with regulation of a downstream cellular process, e.g. transcription." [GOC:BHF, GOC:rl, PMID:12852851]	2	645	1	18123	0.00155039	0.5	Higher in GroupD	['GO:0038084', 'GO:0038189']
GO:BP	GO:0038189	neuropilin signaling pathway	1	FALSE	"A series of molecular signals initiated by the binding of an extracellular ligand to a neuropilin protein on the surface of a target cell, followed by transmission of the signal, and ending with regulation of a downstream cellular process, e.g. transcription." [GOC:BHF, PMID:12852851]	4	645	1	18123	0.00155039	0.25	Higher in GroupD	['GO:0007166']
GO:BP	GO:0038183	bile acid signaling pathway	1	FALSE	"A series of molecular signals initiated by the binding of a bile acid to a receptor, and ending with regulation of a downstream cellular process, e.g. transcription." [GOC:bf, GOC:signaling, PMID:12016314]	14	986	2	18123	0.0020284	0.142857	Higher in GroupD	['GO:0007165']
GO:BP	GO:0038180	nerve growth factor signaling pathway	1	FALSE	"A series of molecular signals initiated by the binding of nerve growth factor (NGF) to a receptor on the surface of the target cell, and ending with regulation of a downstream cellular process, e.g. transcription." [GOC:bf, PMID:11520933]	12	2203	1	18123	0.000453926	0.0833333	Higher in GroupD	['GO:0038179', 'GO:1990090']
GO:BP	GO:0038179	neurotrophin signaling pathway	1	FALSE	"A series of molecular signals initiated by the binding of a neurotrophin to a receptor on the surface of a target cell, and ending with regulation of a downstream cellular process, e.g. transcription. Neurotrophins are a family of secreted growth factors that induce the survival, development, and function of neurons." [GOC:bf, GOC:jc, GOC:signaling, PMID:17466268, Wikipedia:Neurotrophin]	40	2402	8	18123	0.00333056	0.2	Higher in GroupD	['GO:0007166', 'GO:0071363']
GO:BP	GO:0038172	interleukin-33-mediated signaling pathway	1	FALSE	"A series of molecular signals initiated by the binding of interleukin-33 to a receptor on the surface of a cell, and ending with regulation of a downstream cellular process, e.g. transcription." [GOC:jc, GOC:signaling]	3	48	1	18123	0.0208333	0.333333	Higher in GroupD	['GO:0019221']
GO:BP	GO:0038096	Fc-gamma receptor signaling pathway involved in phagocytosis	1	FALSE	"An Fc-gamma receptor signaling pathway that contributes to the endocytic engulfment of external particulate material by phagocytes." [GOC:phg, PMID:12488490, PMID:15466916]	135	333	1	18123	0.003003	0.00740741	Higher in GroupD	['GO:0002431', 'GO:0002433', 'GO:0038094']
GO:BP	GO:0042059	negative regulation of epidermal growth factor receptor signaling pathway	1	FALSE	"Any process that stops, prevents, or reduces the frequency, rate or extent of epidermal growth factor receptor signaling pathway activity." [GOC:go_curators]	49	466	3	18123	0.00643777	0.0612245	Higher in GroupD	['GO:0007173', 'GO:0042058', 'GO:1901185']
GO:BP	GO:0042063	gliogenesis	1	FALSE	"The process that results in the generation of glial cells. This includes the production of glial progenitors and their differentiation into mature glia." [GOC:dgh, GOC:jid]	318	8	1	18123	0.125	0.00314465	Higher in GroupD	['GO:0022008']
GO:BP	GO:0042306	regulation of protein import into nucleus	1	FALSE	"Any process that modulates the frequency, rate or extent of movement of proteins from the cytoplasm to the nucleus." [GOC:jl]	62	802	3	18123	0.00374065	0.0483871	Higher in GroupD	['GO:0006606', 'GO:0033157', 'GO:0046822', 'GO:1900180', 'GO:1904589']
GO:BP	GO:0042304	regulation of fatty acid biosynthetic process	1	FALSE	"Any process that modulates the frequency, rate or extent of the chemical reactions and pathways resulting in the formation of fatty acids, any of the aliphatic monocarboxylic acids that can be liberated by hydrolysis from naturally occurring fats and oils." [GOC:go_curators, GOC:jl]	57	459	4	18123	0.0087146	0.0701754	Higher in GroupD	['GO:0006633', 'GO:0019217', 'GO:0031326', 'GO:0046890']
GO:BP	GO:0042303	molting cycle	1	FALSE	"The periodic casting off and regeneration of an outer covering of cuticle, feathers, hair, horns, skin, etc." [GOC:jl, ISBN:0198506732]	110	1187	11	18123	0.00926706	0.1	Higher in GroupD	['GO:0032501']
GO:BP	GO:0042297	vocal learning	1	FALSE	"A behavioral process whose outcome is a relatively long-lasting behavioral change whereby an organism modifies innate vocalizations to imitate sounds produced by others." [GOC:BHF, GOC:dos, GOC:rl, PMID:16418265, PMID:17035521]	5	1568	1	18123	0.000637755	0.2	Higher in GroupD	['GO:0031223', 'GO:0098596', 'GO:0098598']
GO:BP	GO:0042278	purine nucleoside metabolic process	1	FALSE	"The chemical reactions and pathways involving one of a family of organic molecules consisting of a purine base covalently bonded to a sugar ribose (a ribonucleoside) or deoxyribose (a deoxyribonucleoside)." [GOC:jl, ISBN:0140512713]	27	721	3	18123	0.00416089	0.111111	Higher in GroupD	['GO:0009116', 'GO:0072521']
GO:BP	GO:0042276	error-prone translesion synthesis	1	FALSE	"The conversion of DNA-damage induced single-stranded gaps into large molecular weight DNA after replication by using a specialized DNA polymerase or replication complex to insert a defined nucleotide across the lesion. This process does not remove the replication-blocking lesions and causes an increase in the endogenous mutation level. For example, in E. coli, a low fidelity DNA polymerase, pol …	21	2287	4	18123	0.00174902	0.190476	Higher in GroupD	['GO:0019985']
GO:BP	GO:0042307	positive regulation of protein import into nucleus	1	FALSE	"Any process that activates or increases the frequency, rate or extent of movement of proteins from the cytoplasm into the nucleus." [GOC:jl]	42	693	2	18123	0.002886	0.047619	Higher in GroupD	['GO:0006606', 'GO:0042306', 'GO:0046824', 'GO:0090316', 'GO:1900182', 'GO:1904591']
GO:BP	GO:0042275	error-free postreplication DNA repair	1	FALSE	"The conversion of DNA-damage induced single-stranded gaps into large molecular weight DNA via processes such as template switching, which does not remove the replication-blocking lesions but does not increase the endogenous mutation rate." [GOC:elh, GOC:jl, PMID:11459630]	1	2454	1	18123	0.000407498	1	Higher in GroupD	['GO:0006301']
GO:BP	GO:0042270	protection from natural killer cell mediated cytotoxicity	1	FALSE	"The process of protecting a cell from natural killer cell mediated cytotoxicity." [GOC:add, ISBN:0781735149]	6	2475	3	18123	0.00121212	0.5	Higher in GroupD	['GO:0045953']
GO:BP	GO:0042269	regulation of natural killer cell mediated cytotoxicity	1	FALSE	"Any process that modulates the frequency, rate, or extent of natural killer cell mediated cytotoxicity." [GOC:add, ISBN:0781735149]	41	2618	13	18123	0.00496562	0.317073	Higher in GroupD	['GO:0001910', 'GO:0002715', 'GO:0042267']
GO:BP	GO:0042267	natural killer cell mediated cytotoxicity	1	FALSE	"The directed killing of a target cell by a natural killer cell through the release of granules containing cytotoxic mediators or through the engagement of death receptors." [GOC:add, GOC:pr]	65	2618	18	18123	0.00687548	0.276923	Higher in GroupD	['GO:0001909', 'GO:0002228']
GO:BP	GO:0042265	peptidyl-asparagine hydroxylation	1	FALSE	"The hydroxylation of peptidyl-asparagine to form peptidyl-hydroxyasparagine." [GOC:mah]	1	544	1	18123	0.00183824	1	Higher in GroupD	['GO:0018126', 'GO:0018196']
GO:BP	GO:0042264	peptidyl-aspartic acid hydroxylation	1	FALSE	"The hydroxylation of peptidyl-aspartic acid to form peptidyl-hydroxyaspartic acid." [GOC:mah]	2	544	1	18123	0.00183824	0.5	Higher in GroupD	['GO:0018126', 'GO:0018197']
GO:BP	GO:0042256	mature ribosome assembly	1	FALSE	"The aggregation, arrangement and bonding together of the large and small ribosomal subunits into a functional ribosome." [GOC:ma]	6	1768	3	18123	0.00169683	0.5	Higher in GroupD	['GO:0042255']
GO:BP	GO:0042271	susceptibility to natural killer cell mediated cytotoxicity	1	FALSE	"The process of causing a cell to become susceptible to natural killer cell mediated cytotoxicity." [GOC:add, ISBN:0781735149]	3	599	1	18123	0.00166945	0.333333	Higher in GroupD	['GO:0045954']
GO:BP	GO:0042308	negative regulation of protein import into nucleus	1	FALSE	"Any process that stops, prevents, or reduces the frequency, rate or extent of the movement of proteins from the cytoplasm into the nucleus." [GOC:jl]	12	802	1	18123	0.00124688	0.0833333	Higher in GroupD	['GO:0006606', 'GO:0042306', 'GO:0046823', 'GO:0090317', 'GO:1900181', 'GO:1904590']
GO:BP	GO:0042310	vasoconstriction	1	FALSE	"A decrease in the diameter of blood vessels, especially arteries, due to constriction of smooth muscle cells that line the vessels, and usually causing an increase in blood pressure." [GOC:pr, ISBN:0192800752]	82	1539	3	18123	0.00194932	0.0365854	Higher in GroupD	['GO:0097746']
GO:BP	GO:0042311	vasodilation	1	FALSE	"An increase in the internal diameter of blood vessels, especially arterioles or capillaries, due to relaxation of smooth muscle cells that line the vessels, and usually resulting in a decrease in blood pressure." [GOC:pr, ISBN:0192800981]	40	42	1	18123	0.0238095	0.025	Higher in GroupD	['GO:0097746']
GO:BP	GO:0042401	cellular biogenic amine biosynthetic process	1	FALSE	"The chemical reactions and pathways occurring at the level of individual cells resulting in the formation of any of a group of naturally occurring, biologically active amines, such as norepinephrine, histamine, and serotonin, many of which act as neurotransmitters." [GOC:jl, ISBN:0395825172]	37	477	1	18123	0.00209644	0.027027	Higher in GroupD	['GO:0006576', 'GO:0009309']
GO:BP	GO:0042398	cellular modified amino acid biosynthetic process	1	FALSE	"The chemical reactions and pathways resulting in the formation of compounds derived from amino acids, organic acids containing one or more amino substituents." [GOC:ai]	48	228	1	18123	0.00438596	0.0208333	Higher in GroupD	['GO:1901566']
GO:BP	GO:0042391	regulation of membrane potential	1	FALSE	"Any process that modulates the establishment or extent of a membrane potential, the electric potential existing across any membrane arising from charges in the membrane itself and from the charges present in the media on either side of the membrane." [GOC:jl, GOC:mtg_cardio, GOC:tb, ISBN:0198506732]	446	204	8	18123	0.0392157	0.0179372	Higher in GroupD	['GO:0065008']
GO:BP	GO:0042369	vitamin D catabolic process	1	FALSE	"The chemical reactions and pathways resulting in the breakdown of vitamin D, any of a group of related, fat-soluble compounds that are derived from delta-5,7 steroids and play a central role in calcium metabolism. Specific forms of vitamin D include calciferol (ergocalciferol; vitamin D2) and cholecalciferol (calciol; vitamin D3)." [GOC:mah, ISBN:0471331309]	4	1608	1	18123	0.000621891	0.25	Higher in GroupD	['GO:0006706', 'GO:0042359', 'GO:0042363', 'GO:1901616']
GO:BP	GO:0042368	vitamin D biosynthetic process	1	FALSE	"The chemical reactions and pathways resulting in the formation of vitamin D, any of a group of related, fat-soluble compounds that are derived from delta-5,7 steroids and play a central role in calcium metabolism. Specific forms of vitamin D include calciferol (ergocalciferol; vitamin D2) and cholecalciferol (calciol; vitamin D3)." [GOC:mah, ISBN:0471331309]	10	1608	3	18123	0.00186567	0.3	Higher in GroupD	['GO:0006694', 'GO:0042359', 'GO:0042362', 'GO:1901617']
GO:BP	GO:0042363	fat-soluble vitamin catabolic process	1	FALSE	"The chemical reactions and pathways resulting in the breakdown of any of a diverse group of vitamins that are soluble in organic solvents and relatively insoluble in water." [GOC:jl, ISBN:0198506732]	13	2182	2	18123	0.00091659	0.153846	Higher in GroupD	['GO:0006775', 'GO:0009111']
GO:BP	GO:0042362	fat-soluble vitamin biosynthetic process	1	FALSE	"The chemical reactions and pathways resulting in the formation of any of a diverse group of vitamins that are soluble in organic solvents and relatively insoluble in water." [GOC:jl, ISBN:0198506732]	13	1608	3	18123	0.00186567	0.230769	Higher in GroupD	['GO:0006775', 'GO:0009110']
GO:BP	GO:0042359	vitamin D metabolic process	1	FALSE	"The chemical reactions and pathways involving vitamin D, any of a group of related, fat-soluble compounds that are derived from delta-5,7 steroids and play a central role in calcium metabolism. Specific forms of vitamin D include calciferol (ergocalciferol; vitamin D2) and cholecalciferol (calciol; vitamin D3)." [GOC:mah, ISBN:0471331309]	22	1847	7	18123	0.00378993	0.318182	Higher in GroupD	['GO:0006775', 'GO:0008202', 'GO:1901615']
GO:BP	GO:0042339	keratan sulfate metabolic process	1	FALSE	"The chemical reactions and pathways involving keratan sulfate, a glycosaminoglycan with repeat units consisting of beta-1,4-linked D-galactopyranosyl-beta-(1,4)-N-acetyl-D-glucosamine 6-sulfate and with variable amounts of fucose, sialic acid and mannose units; keratan sulfate chains are covalently linked by a glycosidic attachment through the trisaccharide galactosyl-galactosyl-xylose to peptid…	33	1149	3	18123	0.00261097	0.0909091	Higher in GroupD	['GO:0006790', 'GO:1903510']
GO:BP	GO:0042335	cuticle development	1	FALSE	"The chemical reactions and pathways resulting in the formation of a cuticle, the outer layer of some animals and plants, which acts to prevent water loss." [ISBN:0192800825]	3	402	1	18123	0.00248756	0.333333	Higher in GroupD	['GO:0007275', 'GO:0048856']
GO:BP	GO:0042326	negative regulation of phosphorylation	1	FALSE	"Any process that stops, prevents or decreases the rate of addition of phosphate groups to a molecule." [GOC:jl]	418	745	28	18123	0.0375839	0.0669856	Higher in GroupD	['GO:0016310', 'GO:0042325', 'GO:0045936']
GO:BP	GO:0042323	negative regulation of circadian sleep/wake cycle, non-REM sleep	1	FALSE	"Any process that stops, prevents or reduces the duration or quality of non-rapid eye movement (NREM) sleep." [GOC:jl]	2	1981	1	18123	0.000504796	0.5	Higher in GroupD	['GO:0042321', 'GO:0042748', 'GO:0045188']
GO:BP	GO:0042321	negative regulation of circadian sleep/wake cycle, sleep	1	FALSE	"Any process that stops, prevents or reduces the duration or quality of sleep, a readily reversible state of reduced awareness and metabolic activity that occurs periodically in many animals." [GOC:go_curators, GOC:jl, ISBN:0192800981]	5	1981	1	18123	0.000504796	0.2	Higher in GroupD	['GO:0042754', 'GO:0045187', 'GO:0048521', 'GO:0050802', 'GO:0051241']
GO:BP	GO:0042316	penicillin metabolic process	1	FALSE	"The chemical reactions and pathways involving any antibiotic that contains the condensed beta-lactamthiazolidine ring system. Penicillins are produced naturally during the growth of various microfungi of the genera Penicillium and Aspergillus." [GOC:jl, ISBN:0198506732]	1	986	1	18123	0.0010142	1	Higher in GroupD	['GO:0006790', 'GO:0019748', 'GO:0030653', 'GO:0032787']
GO:BP	GO:0042313	protein kinase C deactivation	1	FALSE	"Any process resulting in the inhibition or termination of the activity of protein kinase C." [GOC:bf]	1	1516	1	18123	0.000659631	1	Higher in GroupD	['GO:0008277']
GO:BP	GO:0042249	establishment of planar polarity of embryonic epithelium	1	FALSE	"Coordinated organization of groups of cells in the plane of an embryonic epithelium, such that they all orient to similar coordinates." [GOC:ascb_2009, GOC:dph, GOC:jl, GOC:tb]	15	1501	1	18123	0.000666223	0.0666667	Higher in GroupD	['GO:0001736']
GO:BP	GO:0042246	tissue regeneration	1	FALSE	"The regrowth of lost or destroyed tissues." [GOC:curators]	80	13	1	18123	0.0769231	0.0125	Higher in GroupD	['GO:0031099', 'GO:0048589']
GO:BP	GO:0042245	RNA repair	1	FALSE	"Any process that results in the repair of damaged RNA." [PMID:11000254, PMID:11070075, UniProtKB-KW:KW-0692]	2	900	1	18123	0.00111111	0.5	Higher in GroupD	['GO:0016070']
GO:BP	GO:0042221	response to chemical	1	FALSE	"Any process that results in a change in state or activity of a cell or an organism (in terms of movement, secretion, enzyme production, gene expression, etc.) as a result of a chemical stimulus." [GOC:jl]	4829	3	3	18123	1	0.000621247	Higher in GroupD	['GO:0050896']
GO:BP	GO:0042119	neutrophil activation	1	FALSE	"The change in morphology and behavior of a neutrophil resulting from exposure to a cytokine, chemokine, cellular ligand, or soluble factor." [GOC:mgi_curators, ISBN:0781735149]	502	108	5	18123	0.0462963	0.00996016	Higher in GroupD	['GO:0036230']
GO:BP	GO:0042118	endothelial cell activation	1	FALSE	"The change in morphology and behavior of an endothelial cell resulting from exposure to a cytokine, chemokine, cellular ligand, or soluble factor." [GOC:mgi_curators, ISBN:0781735149, PMID:12851652, PMID:14581484]	13	912	2	18123	0.00219298	0.153846	Higher in GroupD	['GO:0001775']
GO:BP	GO:0042117	monocyte activation	1	FALSE	"The change in morphology and behavior of a monocyte resulting from exposure to a cytokine, chemokine, cellular ligand, or soluble factor." [GOC:mgi_curators, ISBN:0781735149]	12	2509	3	18123	0.0011957	0.25	Higher in GroupD	['GO:0002274']
GO:BP	GO:0042116	macrophage activation	1	FALSE	"A change in morphology and behavior of a macrophage resulting from exposure to a cytokine, chemokine, cellular ligand, or soluble factor." [GOC:mgi_curators, ISBN:0781735149, PMID:14506301]	109	2128	18	18123	0.00845865	0.165138	Higher in GroupD	['GO:0002274']
GO:BP	GO:0042113	B cell activation	1	FALSE	"The change in morphology and behavior of a mature or immature B cell resulting from exposure to a mitogen, cytokine, chemokine, cellular ligand, or an antigen for which it is specific." [GOC:mgi_curators, ISBN:0781735149]	337	1299	27	18123	0.0207852	0.0801187	Higher in GroupD	['GO:0046649']
GO:BP	GO:0042110	T cell activation	1	FALSE	"The change in morphology and behavior of a mature or immature T cell resulting from exposure to a mitogen, cytokine, chemokine, cellular ligand, or an antigen for which it is specific." [GOC:mgi_curators, ISBN:0781735149]	495	721	31	18123	0.0429958	0.0626263	Higher in GroupD	['GO:0046649']
GO:BP	GO:0042104	positive regulation of activated T cell proliferation	1	FALSE	"Any process that activates or increases the rate or extent of activated T cell proliferation." [GOC:jl]	28	412	2	18123	0.00485437	0.0714286	Higher in GroupD	['GO:0042102', 'GO:0046006', 'GO:0050798']
GO:BP	GO:0042102	positive regulation of T cell proliferation	1	FALSE	"Any process that activates or increases the rate or extent of T cell proliferation." [GOC:ai]	104	721	10	18123	0.0138696	0.0961538	Higher in GroupD	['GO:0042098', 'GO:0042129', 'GO:0050671', 'GO:0050870']
GO:BP	GO:0042100	B cell proliferation	1	FALSE	"The expansion of a B cell population by cell division. Follows B cell activation." [GOC:jl]	101	1299	11	18123	0.00846805	0.108911	Higher in GroupD	['GO:0042113', 'GO:0046651']
GO:BP	GO:0042098	T cell proliferation	1	FALSE	"The expansion of a T cell population by cell division. Follows T cell activation." [GOC:jl]	206	721	19	18123	0.0263523	0.092233	Higher in GroupD	['GO:0042110', 'GO:0046651']
GO:BP	GO:0042093	T-helper cell differentiation	1	FALSE	"The process in which a relatively unspecialized thymocyte acquires specialized features of a T-helper cell." [GOC:ebc]	66	1351	13	18123	0.0096225	0.19697	Higher in GroupD	['GO:0002294']
GO:BP	GO:0042092	type 2 immune response	1	FALSE	"An immune response which is associated with resistance to extracellular organisms such as helminths and pathological conditions such as allergy, which is orchestrated by the production of particular cytokines, most notably IL-4, IL-5, IL-10, and IL-13, by any of a variety of cell types including T-helper 2 cells, eosinophils, basophils, mast cells, and nuocytes, resulting in enhanced production …	36	1351	5	18123	0.00370096	0.138889	Higher in GroupD	['GO:0006955']
GO:BP	GO:0042088	T-helper 1 type immune response	1	FALSE	"An immune response which is associated with resistance to intracellular bacteria, fungi, and protozoa, and pathological conditions such as arthritis, and which is typically orchestrated by the production of particular cytokines by T-helper 1 cells, most notably interferon-gamma, IL-2, and lymphotoxin." [GOC:add, ISBN:0781735149]	45	427	3	18123	0.00702576	0.0666667	Higher in GroupD	['GO:0002460']
GO:BP	GO:0042073	intraciliary transport	1	FALSE	"The bidirectional movement of large protein complexes along microtubules within a cilium, mediated by motor proteins." [GOC:cilia, GOC:kmv, PMID:17981739, PMID:18180368, PMID:22869374, Reactome:R-HSA-5620924.2]	53	446	1	18123	0.00224215	0.0188679	Higher in GroupD	['GO:0010970', 'GO:0031503', 'GO:0044782']
GO:BP	GO:0042069	regulation of catecholamine metabolic process	1	FALSE	"Any process that modulates the frequency, rate or extent of the chemical reactions and pathways involving catecholamines." [GOC:go_curators]	17	2410	1	18123	0.000414938	0.0588235	Higher in GroupD	['GO:0006584', 'GO:0033238', 'GO:0080090']
GO:BP	GO:0042127	regulation of cell population proliferation	1	FALSE	"Any process that modulates the frequency, rate or extent of cell proliferation." [GOC:jl]	1774	101	19	18123	0.188119	0.0107103	Higher in GroupD	['GO:0008283', 'GO:0050794']
GO:BP	GO:0042060	wound healing	1	FALSE	"The series of events that restore integrity to a damaged tissue, following an injury." [GOC:bf, PMID:15269788]	555	306	21	18123	0.0686275	0.0378378	Higher in GroupD	['GO:0009611']
GO:BP	GO:0042129	regulation of T cell proliferation	1	FALSE	"Any process that modulates the frequency, rate or extent of T cell proliferation." [GOC:jl]	177	721	16	18123	0.0221914	0.0903955	Higher in GroupD	['GO:0042098', 'GO:0050670', 'GO:0050863']
GO:BP	GO:0042133	neurotransmitter metabolic process	1	FALSE	"The chemical reactions and pathways involving neurotransmitters, any of a group of substances that are released on excitation from the axon terminal of a presynaptic neuron of the central or peripheral nervous system and travel across the synaptic cleft to either excite or inhibit the target cell." [GOC:jl]	31	400	2	18123	0.005	0.0645161	Higher in GroupD	['GO:0001505', 'GO:0044237']
GO:BP	GO:0042220	response to cocaine	1	FALSE	"Any process that results in a change in state or activity of a cell or an organism (in terms of movement, secretion, enzyme production, gene expression, etc.) as a result of a cocaine stimulus. Cocaine is a crystalline alkaloid obtained from the leaves of the coca plant." [GOC:ef, GOC:jl]	57	1126	5	18123	0.0044405	0.0877193	Higher in GroupD	['GO:0014070', 'GO:0043279', 'GO:1901700']
GO:BP	GO:0042182	ketone catabolic process	1	FALSE	"The chemical reactions and pathways resulting in the breakdown of ketones, a class of organic compounds that contain the carbonyl group, CO, and in which the carbonyl group is bonded only to carbon atoms. The general formula for a ketone is RCOR, where R and R are alkyl or aryl groups." [GOC:go_curators]	16	1229	2	18123	0.00162734	0.125	Higher in GroupD	['GO:0042180', 'GO:0044248', 'GO:0044282', 'GO:1901575']
GO:BP	GO:0042181	ketone biosynthetic process	1	FALSE	"The chemical reactions and pathways resulting in the formation of ketones, a class of organic compounds that contain the carbonyl group, CO, and in which the carbonyl group is bonded only to carbon atoms. The general formula for a ketone is RCOR, where R and R are alkyl or aryl groups." [GOC:go_curators]	45	256	1	18123	0.00390625	0.0222222	Higher in GroupD	['GO:0042180', 'GO:0044249', 'GO:0044283', 'GO:1901576']
GO:BP	GO:0042180	cellular ketone metabolic process	1	FALSE	"The chemical reactions and pathways involving any of a class of organic compounds that contain the carbonyl group, CO, and in which the carbonyl group is bonded only to carbon atoms, as carried out by individual cells. The general formula for a ketone is RCOR, where R and R are alkyl or aryl groups." [GOC:jl, ISBN:0787650153]	274	1635	28	18123	0.0171254	0.10219	Higher in GroupD	['GO:0044237', 'GO:0044281', 'GO:0071704']
GO:BP	GO:0042178	xenobiotic catabolic process	1	FALSE	"The chemical reactions and pathways resulting in the breakdown of a xenobiotic compound, a compound foreign to living organisms. Used of chemical compounds, e.g. a xenobiotic chemical, such as a pesticide." [GOC:jl]	12	986	3	18123	0.0030426	0.25	Higher in GroupD	['GO:0006805', 'GO:0044248']
GO:BP	GO:0042177	negative regulation of protein catabolic process	1	FALSE	"Any process that stops, prevents, or reduces the frequency, rate or extent of the chemical reactions and pathways resulting in the breakdown of a protein by the destruction of the native, active configuration, with or without the hydrolysis of peptide bonds." [GOC:go_curators, GOC:jl, PMID:10207076]	123	1238	14	18123	0.0113086	0.113821	Higher in GroupD	['GO:0009895', 'GO:0030163', 'GO:0042176', 'GO:0051248']
GO:BP	GO:0042168	heme metabolic process	1	FALSE	"The chemical reactions and pathways involving heme, any compound of iron complexed in a porphyrin (tetrapyrrole) ring." [GOC:jl, ISBN:0124325653]	47	80	2	18123	0.025	0.0425532	Higher in GroupD	['GO:0006778', 'GO:0042440']
GO:BP	GO:0042167	heme catabolic process	1	FALSE	"The chemical reactions and pathways resulting in the breakdown of heme, any compound of iron complexed in a porphyrin (tetrapyrrole) ring." [GOC:jl]	16	19	1	18123	0.0526316	0.0625	Higher in GroupD	['GO:0006787', 'GO:0042168', 'GO:0046149']
GO:BP	GO:0042159	lipoprotein catabolic process	1	FALSE	"The chemical reactions and pathways resulting in the breakdown of any conjugated, water-soluble protein in which the covalently attached nonprotein group consists of a lipid or lipids." [ISBN:0198506732]	16	259	1	18123	0.003861	0.0625	Higher in GroupD	['GO:0030163', 'GO:0042157']
GO:BP	GO:0042158	lipoprotein biosynthetic process	1	FALSE	"The chemical reactions and pathways resulting in the formation of any conjugated, water-soluble protein in which the covalently attached nonprotein group consists of a lipid or lipids." [ISBN:0198506732]	96	1844	7	18123	0.0037961	0.0729167	Higher in GroupD	['GO:0034645', 'GO:0042157', 'GO:1901566']
GO:BP	GO:0042157	lipoprotein metabolic process	1	FALSE	"The chemical reactions and pathways involving any conjugated, water-soluble protein in which the covalently attached nonprotein group consists of a lipid or lipids." [ISBN:0198506732]	136	927	5	18123	0.00539374	0.0367647	Higher in GroupD	['GO:0019538']
GO:BP	GO:0042148	strand invasion	1	FALSE	"The process in which the nucleoprotein complex (composed of the broken single-strand DNA and the recombinase) searches and identifies a region of homology in intact duplex DNA. The broken single-strand DNA displaces the like strand and forms Watson-Crick base pairs with its complement, forming a duplex in which each strand is from one of the two recombining DNA molecules." [GOC:elh, PMID:1035785…	5	2358	1	18123	0.000424088	0.2	Higher in GroupD	['GO:0006259', 'GO:0006310']
GO:BP	GO:0042147	retrograde transport, endosome to Golgi	1	FALSE	"The directed movement of membrane-bounded vesicles from endosomes back to the trans-Golgi network where they are recycled for further rounds of transport." [GOC:jl, PMID:10873832, PMID:16936697]	92	777	1	18123	0.001287	0.0108696	Higher in GroupD	['GO:0016197', 'GO:0016482']
GO:BP	GO:0042144	vacuole fusion, non-autophagic	1	FALSE	"The fusion of two vacuole membranes to form a single vacuole." [GOC:jl]	5	1506	3	18123	0.00199203	0.6	Higher in GroupD	['GO:0097576']
GO:BP	GO:0042136	neurotransmitter biosynthetic process	1	FALSE	"The chemical reactions and pathways resulting in the formation of any of a group of substances that are released on excitation from the axon terminal of a presynaptic neuron of the central or peripheral nervous system and travel across the synaptic cleft to either excite or inhibit the target cell." [GOC:jl]	17	400	2	18123	0.005	0.117647	Higher in GroupD	['GO:0042133', 'GO:0044249']
GO:BP	GO:0042130	negative regulation of T cell proliferation	1	FALSE	"Any process that stops, prevents or reduces the rate or extent of T cell proliferation." [GOC:jl]	71	7	1	18123	0.142857	0.0140845	Higher in GroupD	['GO:0042098', 'GO:0042129', 'GO:0050672', 'GO:0050868']
GO:BP	GO:0035794	positive regulation of mitochondrial membrane permeability	1	FALSE	"Any process that increases the frequency, rate or extent of the passage or uptake of molecules by the mitochondrial membrane." [GOC:bf, PMID:12546810]	67	1275	10	18123	0.00784314	0.149254	Higher in GroupD	['GO:0046902', 'GO:1905710']
GO:BP	GO:0038095	Fc-epsilon receptor signaling pathway	1	FALSE	"A series of molecular signals initiated by the binding of the Fc portion of immunoglobulin E (IgE) to an Fc-epsilon receptor on the surface of a signal-receiving cell, and ending with regulation of a downstream cellular process, e.g. transcription. The Fc portion of an immunoglobulin is its C-terminal constant region." [GOC:phg, PMID:12413516, PMID:15048725]	167	1955	20	18123	0.0102302	0.11976	Higher in GroupD	['GO:0038093']
GO:BP	GO:0038093	Fc receptor signaling pathway	1	FALSE	"A series of molecular signals initiated by the binding of the Fc portion of an immunoglobulin to an Fc receptor on the surface of a signal-receiving cell, and ending with regulation of a downstream cellular process, e.g. transcription. The Fc portion of an immunoglobulin is its C-terminal constant region." [GOC:phg, Wikipedia:Fc_receptor]	238	1955	26	18123	0.0132992	0.109244	Higher in GroupD	['GO:0002768']
GO:BP	GO:0036015	response to interleukin-3	1	FALSE	"Any process that results in a change in state or activity of a cell or an organism (in terms of movement, secretion, enzyme production, gene expression, etc.) as a result of an interleukin-3 stimulus." [GOC:yaf]	6	984	1	18123	0.00101626	0.166667	Higher in GroupD	['GO:0034097']
GO:BP	GO:0036010	protein localization to endosome	1	FALSE	"A process in which a protein is transported to, or maintained in, a location within an endosome." [GOC:yaf]	26	645	1	18123	0.00155039	0.0384615	Higher in GroupD	['GO:0033365']
GO:BP	GO:0036006	cellular response to macrophage colony-stimulating factor stimulus	1	FALSE	"Any process that results in a change in state or activity of a cell (in terms of movement, secretion, enzyme production, gene expression, etc.) as a result of a macrophage colony-stimulating factor stimulus." [GOC:yaf, PMID:14687666]	12	1406	3	18123	0.00213371	0.25	Higher in GroupD	['GO:0036005', 'GO:0071345']
GO:BP	GO:0036005	response to macrophage colony-stimulating factor	1	FALSE	"Any process that results in a change in state or activity of a cell or an organism (in terms of movement, secretion, enzyme production, gene expression, etc.) as a result of a macrophage colony-stimulating factor stimulus." [GOC:yaf, PMID:14687666]	12	1406	3	18123	0.00213371	0.25	Higher in GroupD	['GO:0034097']
GO:BP	GO:0036003	positive regulation of transcription from RNA polymerase II promoter in response to stress	1	FALSE	"Any process that increases the frequency, rate or extent of transcription from an RNA polymerase II promoter as a result of a stimulus indicating the organism is under stress. The stress is usually, but not necessarily, exogenous (e.g. temperature, humidity, ionizing radiation)." [GOC:mcc]	25	75	1	18123	0.0133333	0.04	Higher in GroupD	['GO:0043618', 'GO:0045944']
GO:BP	GO:0035999	tetrahydrofolate interconversion	1	FALSE	"The chemical reactions and pathways by which one-carbon (C1) units are transferred between tetrahydrofolate molecules, to synthesise other tetrahydrofolate molecules." [GOC:yaf, PMID:1825999, UniPathway:UPA00193]	10	1234	2	18123	0.00162075	0.2	Higher in GroupD	['GO:0006730', 'GO:0046653']
GO:BP	GO:0036016	cellular response to interleukin-3	1	FALSE	"Any process that results in a change in state or activity of a cell (in terms of movement, secretion, enzyme production, gene expression, etc.) as a result of an interleukin-3 stimulus." [GOC:yaf]	6	984	1	18123	0.00101626	0.166667	Higher in GroupD	['GO:0036015', 'GO:0071345']
GO:BP	GO:0035995	detection of muscle stretch	1	FALSE	"The series of events by which a muscle stretch stimulus is received by a cell and converted into a molecular signal." [PMID:14583192]	7	968	1	18123	0.00103306	0.142857	Higher in GroupD	['GO:0035994', 'GO:0050982']
GO:BP	GO:0035988	chondrocyte proliferation	1	FALSE	"The multiplication or reproduction of chondrocytes by cell division, resulting in the expansion of their population. A chondrocyte is a polymorphic cell that forms cartilage." [CL:0000138, GOC:yaf, PMID:21484705]	24	60	1	18123	0.0166667	0.0416667	Higher in GroupD	['GO:0008283']
GO:BP	GO:0035987	endodermal cell differentiation	1	FALSE	"The process in which a relatively unspecialized cell acquires the specialized features of an endoderm cell, a cell of the inner of the three germ layers of the embryo." [CL:0000223, GOC:yaf, PMID:17624332]	45	10	1	18123	0.1	0.0222222	Higher in GroupD	['GO:0001706', 'GO:0030154']
GO:BP	GO:0035981	tongue muscle cell differentiation	1	FALSE	"The process in which a relatively unspecialized cell acquires specialized features of a tongue muscle cell." [CL:0002673, GOC:yaf, PMID:3393851]	2	2182	1	18123	0.000458295	0.5	Higher in GroupD	['GO:0098528']
GO:BP	GO:0035973	aggrephagy	1	FALSE	"Selective degradation of protein aggregates by macroautophagy." [GOC:autophagy, GOC:kmv, PMID:18508269, PMID:25062811]	31	1917	5	18123	0.00260824	0.16129	Higher in GroupD	['GO:0061912']
GO:BP	GO:0035970	peptidyl-threonine dephosphorylation	1	FALSE	"The removal of phosphoric residues from peptidyl-O-phospho-L-threonine to form peptidyl-threonine." [GOC:bf]	22	992	6	18123	0.00604839	0.272727	Higher in GroupD	['GO:0006470']
GO:BP	GO:0035967	cellular response to topologically incorrect protein	1	FALSE	"Any process that results in a change in state or activity of a cell (in terms of movement, secretion, enzyme production, gene expression, etc.) as a result of a protein that is not folded in its correct three-dimensional structure." [GOC:bf]	169	3	1	18123	0.333333	0.00591716	Higher in GroupD	['GO:0033554', 'GO:0035966', 'GO:0071310']
GO:BP	GO:0035994	response to muscle stretch	1	FALSE	"Any process that results in a change in state or activity of a cell or an organism (in terms of movement, secretion, enzyme production, gene expression, etc.) as a result of a myofibril being extended beyond its slack length." [GOC:BHF, GOC:vk, PMID:14583192]	23	2006	6	18123	0.00299103	0.26087	Higher in GroupD	['GO:0009612']
GO:BP	GO:0036017	response to erythropoietin	1	FALSE	"Any process that results in a change in state or activity of a cell or an organism (in terms of movement, secretion, enzyme production, gene expression, etc.) as a result of an erythropoietin stimulus. Erythropoietin is a glycoprotein hormone that controls erythropoiesis." [GOC:yaf]	8	263	1	18123	0.00380228	0.125	Higher in GroupD	['GO:0034097']
GO:BP	GO:0036018	cellular response to erythropoietin	1	FALSE	"Any process that results in a change in state or activity of a cell (in terms of movement, secretion, enzyme production, gene expression, etc.) as a result of an erythropoietin stimulus." [GOC:yaf]	7	263	1	18123	0.00380228	0.142857	Higher in GroupD	['GO:0036017', 'GO:0071345']
GO:BP	GO:0036031	recruitment of mRNA capping enzyme to RNA polymerase II holoenzyme complex	1	FALSE	"The process in which the guanylyltransferase enzyme responsible for adding a 7-methylguanosine cap on pre-mRNA becomes associated with the RNA polymerase II holoenzyme complex and the 5' end of a transcript." [GOC:bf, GOC:rb, PMID:10594013]	2	464	1	18123	0.00215517	0.5	Higher in GroupD	['GO:0006370', 'GO:0022618']
GO:BP	GO:0036150	phosphatidylserine acyl-chain remodeling	1	FALSE	"Remodeling the acyl chains of phosphatidylserine, through sequential deacylation and re-acylation reactions, to generate phosphatidylserine containing different types of fatty acid acyl chains." [GOC:mw, PMID:18287005, PMID:18458083]	22	309	1	18123	0.00323625	0.0454545	Higher in GroupD	['GO:0006658']
GO:BP	GO:0036149	phosphatidylinositol acyl-chain remodeling	1	FALSE	"Remodeling the acyl chains of phosphatidylinositol, through sequential deacylation and re-acylation reactions, to generate phosphatidylinositol containing different types of fatty acid acyl chains." [GOC:mw, PMID:18094042, PMID:18772128]	18	309	1	18123	0.00323625	0.0555556	Higher in GroupD	['GO:0046488']
GO:BP	GO:0036145	dendritic cell homeostasis	1	FALSE	"The process of regulating the proliferation and elimination of dendritic cells such that the total number of dendritic cells within a whole or part of an organism is stable over time in the absence of an outside stimulus." [CL:0000451, GOC:uh, PMID:12570827, PMID:19176316]	1	1121	1	18123	0.000892061	1	Higher in GroupD	['GO:0001776']
GO:BP	GO:0036138	peptidyl-histidine hydroxylation	1	FALSE	"The hydroxylation of peptidyl-histidine to form peptidyl-hydroxyhistidine." [GOC:reh, PMID:21251231]	1	544	1	18123	0.00183824	1	Higher in GroupD	['GO:0018126', 'GO:0018202']
GO:BP	GO:0036124	histone H3-K9 trimethylation	1	FALSE	"The modification of histone H3 by addition of three methyl groups to lysine at position 9 of the histone." [GOC:vw]	16	297	1	18123	0.003367	0.0625	Higher in GroupD	['GO:0018023', 'GO:0051567']
GO:BP	GO:0036123	histone H3-K9 dimethylation	1	FALSE	"The modification of histone H3 by addition of two methyl groups to lysine at position 9 of the histone." [GOC:vw]	7	125	1	18123	0.008	0.142857	Higher in GroupD	['GO:0018027', 'GO:0051567']
GO:BP	GO:0036120	cellular response to platelet-derived growth factor stimulus	1	FALSE	"Any process that results in a change in state or activity of a cell (in terms of movement, secretion, enzyme production, gene expression, etc.) as a result of a platelet-derived growth factor stimulus." [GOC:yaf]	20	466	1	18123	0.00214592	0.05	Higher in GroupD	['GO:0036119', 'GO:0071363', 'GO:0071495']
GO:BP	GO:0036119	response to platelet-derived growth factor	1	FALSE	"Any process that results in a change in state or activity of a cell or an organism (in terms of movement, secretion, enzyme production, gene expression, etc.) as a result of a platelet-derived growth factor stimulus." [GOC:yaf]	21	466	1	18123	0.00214592	0.047619	Higher in GroupD	['GO:0009719', 'GO:0070848']
GO:BP	GO:0036118	hyaluranon cable assembly	1	FALSE	"A process that results in the aggregation, arrangement and bonding together of a hyaluranon cable, a cable structure, surrounding some cell types (e.g. proximal or bronchial tubular epithelial cells), and composed of hyaluranon (HA), a ubiquitous connective tissue glycosaminoglycan." [GOC:yaf, PMID:16900089]	3	465	1	18123	0.00215054	0.333333	Higher in GroupD	['GO:0022607']
GO:BP	GO:0036109	alpha-linolenic acid metabolic process	1	FALSE	"The chemical reactions and pathways involving alpha-linolenic acid, an unsaturated omega-6 fatty acid that has the molecular formula C18H32O2." [PMID:15538555]	13	52	1	18123	0.0192308	0.0769231	Higher in GroupD	['GO:0001676', 'GO:0033559', 'GO:0120254']
GO:BP	GO:0036092	phosphatidylinositol-3-phosphate biosynthetic process	1	FALSE	"The chemical reactions and pathways resulting in the formation of phosphatidylinositol-3-phosphate, a phosphatidylinositol monophosphate carrying the phosphate group at the 3-position." [GOC:al, GOC:vw]	13	672	1	18123	0.0014881	0.0769231	Higher in GroupD	['GO:0046854']
GO:BP	GO:0036049	peptidyl-lysine desuccinylation	1	FALSE	"The removal of a succinyl group (CO-CH2-CH2-CO) from a succinylated lysine residue in a peptide or protein." [GOC:sp, PMID:22076378]	2	1392	1	18123	0.000718391	0.5	Higher in GroupD	['GO:0018205', 'GO:0036048']
GO:BP	GO:0036048	protein desuccinylation	1	FALSE	"The removal of a succinyl group (CO-CH2-CH2-CO) from a residue in a peptide or protein." [GOC:sp, PMID:22076378]	2	1392	1	18123	0.000718391	0.5	Higher in GroupD	['GO:0035601']
GO:BP	GO:0036037	CD8-positive, alpha-beta T cell activation	1	FALSE	"The change in morphology and behavior of a CD8-positive, alpha-beta T cell resulting from exposure to a mitogen, cytokine, chemokine, cellular ligand, or an antigen for which it is specific." [CL:0000625, GOC:yaf]	27	898	5	18123	0.00556793	0.185185	Higher in GroupD	['GO:0046631']
GO:BP	GO:0036035	osteoclast development	1	FALSE	"The process whose specific outcome is the progression of a osteoclast from its formation to the mature structure. Cell development does not include the steps involved in committing a cell to a specific fate. An osteoclast is a specialized phagocytic cell associated with the absorption and removal of the mineralized matrix of bone tissue." [CL:0000092, GOC:bf, GOC:yaf]	16	974	3	18123	0.00308008	0.1875	Higher in GroupD	['GO:0030316', 'GO:0061515', 'GO:0098751']
GO:BP	GO:0035966	response to topologically incorrect protein	1	FALSE	"Any process that results in a change in state or activity of a cell or an organism (in terms of movement, secretion, enzyme production, gene expression, etc.) as a result of a protein that is not folded in its correct three-dimensional structure." [GOC:bf]	206	3	1	18123	0.333333	0.00485437	Higher in GroupD	['GO:0006950', 'GO:0010033']
GO:BP	GO:0035964	COPI-coated vesicle budding	1	FALSE	"The evagination of a Golgi membrane, resulting in formation of a COPI-coated vesicle." [GOC:br, PMID:10052452, PMID:17041781]	6	1664	1	18123	0.000600962	0.166667	Higher in GroupD	['GO:0006900', 'GO:0048199']
GO:BP	GO:0035946	mitochondrial mRNA surveillance	1	FALSE	"The set of processes involved in identifying and degrading messenger RNA (mRNA) within the mitochondrion." [GOC:ans, PMID:19864255]	1	258	1	18123	0.00387597	1	Higher in GroupD	['GO:2000827']
GO:BP	GO:0035945	mitochondrial ncRNA surveillance	1	FALSE	"The set of processes involved in identifying and degrading defective or aberrant non-coding RNA transcripts (ncRNAs) within the mitochondrion." [GOC:ans, PMID:19864255]	1	258	1	18123	0.00387597	1	Higher in GroupD	['GO:2000827']
GO:BP	GO:0035871	protein K11-linked deubiquitination	1	FALSE	"A protein deubiquitination process in which a K11-linked ubiquitin chain, i.e. a polymer of ubiquitin formed by linkages between lysine residues at position 11 of the ubiquitin monomers, is removed from a protein." [GOC:sp, PMID:21596315]	10	3	1	18123	0.333333	0.1	Higher in GroupD	['GO:0016579']
GO:BP	GO:0035865	cellular response to potassium ion	1	FALSE	"Any process that results in a change in state or activity of a cell (in terms of movement, secretion, enzyme production, gene expression, etc.) as a result of a potassium ion stimulus." [GOC:yaf]	11	832	1	18123	0.00120192	0.0909091	Higher in GroupD	['GO:0035864', 'GO:0071248']
GO:BP	GO:0035864	response to potassium ion	1	FALSE	"Any process that results in a change in state or activity of a cell or an organism (in terms of movement, secretion, enzyme production, gene expression, etc.) as a result of a potassium ion stimulus." [GOC:yaf]	16	832	1	18123	0.00120192	0.0625	Higher in GroupD	['GO:0010038']
GO:BP	GO:0035860	glial cell-derived neurotrophic factor receptor signaling pathway	1	FALSE	"The series of molecular signals generated as a consequence of a glial cell-derived neurotrophic factor receptor binding to one of its physiological ligands." [GOC:yaf, PMID:12953054]	10	16	1	18123	0.0625	0.1	Higher in GroupD	['GO:0007169']
GO:BP	GO:0035855	megakaryocyte development	1	FALSE	"The process whose specific outcome is the progression of a megakaryocyte cell over time, from its formation to the mature structure. Megakaryocyte development does not include the steps involved in committing a cell to a megakaryocyte fate. A megakaryocyte is a giant cell 50 to 100 micron in diameter, with a greatly lobulated nucleus, found in the bone marrow." [CL:0000556, GOC:BHF, GOC:vk]	17	1117	2	18123	0.00179051	0.117647	Higher in GroupD	['GO:0030219', 'GO:0061515', 'GO:0098751']
GO:BP	GO:0035850	epithelial cell differentiation involved in kidney development	1	FALSE	"The process in which relatively unspecialized cells acquire specialized structural and/or functional features of an epithelial cell that characterize the cells of the kidney as it progresses from its formation to the mature state." [GOC:bf, GOC:mtg_kidney_jan10, GOC:yaf, PMID:16216236]	48	1481	7	18123	0.00472654	0.145833	Higher in GroupD	['GO:0030855', 'GO:0061005']
GO:BP	GO:0035845	photoreceptor cell outer segment organization	1	FALSE	"A process that is carried out at the cellular level and results in the assembly, arrangement of constituent parts, or disassembly of the outer segment of a photoreceptor cell, a sensory cell that reacts to the presence of light. The outer segment of the photoreceptor cell contains the light-absorbing materials." [ISBN:0824072820, PMID:14507858]	13	2300	2	18123	0.000869565	0.153846	Higher in GroupD	['GO:0016043', 'GO:0042461']
GO:BP	GO:0035825	homologous recombination	1	FALSE	"A DNA recombination process that results in the exchange of an equal amount of genetic material between highly homologous DNA molecules." [GOC:mah, PMID:11139492, PMID:17304215]	60	1898	3	18123	0.00158061	0.05	Higher in GroupD	['GO:0006310']
GO:BP	GO:0035822	gene conversion	1	FALSE	"A DNA recombination process that results in the unidirectional transfer of genetic material from a donor sequence to a highly homologous acceptor. The resulting acceptor sequence is identical to that of the donor." [GOC:mah, PMID:17846636]	4	1898	1	18123	0.00052687	0.25	Higher in GroupD	['GO:0035825']
GO:BP	GO:0035821	modulation of process of other organism	1	FALSE	"The process in which an organism effects a change in the structure or processes of another organism." [GOC:bf]	149	2155	29	18123	0.0134571	0.194631	Higher in GroupD	['GO:0044419']
GO:BP	GO:0035815	positive regulation of renal sodium excretion	1	FALSE	"Any process that increases the amount of sodium excreted in urine over a unit of time." [GOC:mtg_25march11, GOC:yaf]	14	330	1	18123	0.0030303	0.0714286	Higher in GroupD	['GO:0035812', 'GO:0035813', 'GO:0051047', 'GO:0051240']
GO:BP	GO:0035813	regulation of renal sodium excretion	1	FALSE	"Any process that modulates the amount of sodium excreted in urine over a unit of time." [GOC:mtg_25march11, GOC:yaf]	21	330	1	18123	0.0030303	0.047619	Higher in GroupD	['GO:0035812', 'GO:0044062', 'GO:0065008', 'GO:0098801']
GO:BP	GO:0035812	renal sodium excretion	1	FALSE	"The elimination by an organism of sodium in the urine." [GOC:mtg_25march11, GOC:yaf]	23	330	1	18123	0.0030303	0.0434783	Higher in GroupD	['GO:0003014', 'GO:0007588', 'GO:0055078']
GO:BP	GO:0035810	positive regulation of urine volume	1	FALSE	"Any process that increases the amount of urine excreted from the body over a unit of time." [GOC:mtg_25march11, GOC:yaf]	14	330	1	18123	0.0030303	0.0714286	Higher in GroupD	['GO:0035809']
GO:BP	GO:0035809	regulation of urine volume	1	FALSE	"Any process that modulates the amount of urine excreted from the body over a unit of time." [GOC:mtg_25march11, GOC:yaf]	23	330	1	18123	0.0030303	0.0434783	Higher in GroupD	['GO:0003014', 'GO:0050878']
GO:BP	GO:0035872	nucleotide-binding domain, leucine rich repeat containing receptor signaling pathway	1	FALSE	"A series of molecular signals generated as a consequence of a nucleotide-binding domain, leucine rich repeat containing receptor (NLR) binding to one of its physiological ligands. NLRs are cytoplasmic receptors defined by their tripartite domain architecture that contains: a variable C-terminus, a middle nucleotide-binding domain, and a LRR domain that is variable in the repeats composition and …	42	1992	12	18123	0.0060241	0.285714	Higher in GroupD	['GO:0030522']
GO:BP	GO:0036151	phosphatidylcholine acyl-chain remodeling	1	FALSE	"Remodeling the acyl chains of phosphatidylcholine, through sequential deacylation and re-acylation reactions, to generate phosphatidylcholine containing different types of fatty acid acyl chains." [GOC:mw, PMID:18195019, PMID:18458083]	30	309	1	18123	0.00323625	0.0333333	Higher in GroupD	['GO:0046470']
GO:BP	GO:0035873	lactate transmembrane transport	1	FALSE	"The process in which lactate is transported across a membrane. Lactate is 2-hydroxypropanoate, CH3-CHOH-COOH; L(+)-lactate is formed by anaerobic glycolysis in animal tissues, and DL-lactate is found in sour milk, molasses and certain fruit juices." [GOC:mcc, ISBN:0198506732]	8	113	1	18123	0.00884956	0.125	Higher in GroupD	['GO:0015727', 'GO:0098656', 'GO:1905039']
GO:BP	GO:0035879	plasma membrane lactate transport	1	FALSE	"The directed movement of lactate across a plasma membrane." [GOC:mcc]	4	2544	3	18123	0.00117925	0.75	Higher in GroupD	['GO:0035873']
GO:BP	GO:0035938	estradiol secretion	1	FALSE	"The regulated release of estradiol into the circulatory system." [GOC:sl, PMID:21632818]	3	405	1	18123	0.00246914	0.333333	Higher in GroupD	['GO:0015850', 'GO:0046879', 'GO:0140353']
GO:BP	GO:0035935	androgen secretion	1	FALSE	"The regulated release of an androgen into the circulatory system. Androgens are steroid hormones that stimulate or control the development and maintenance of masculine characteristics in vertebrates." [GOC:sl]	1	416	1	18123	0.00240385	1	Higher in GroupD	['GO:0035929']
GO:BP	GO:0035929	steroid hormone secretion	1	FALSE	"The regulated release of any steroid that acts as a hormone into the circulatory system." [GOC:sl]	22	416	1	18123	0.00240385	0.0454545	Higher in GroupD	['GO:0060986', 'GO:0140353']
GO:BP	GO:0035924	cellular response to vascular endothelial growth factor stimulus	1	FALSE	"Any process that results in a change in state or activity of a cell (in terms of movement, secretion, enzyme production, gene expression, etc.) as a result of a vascular endothelial growth factor stimulus." [GOC:BHF, GOC:rl, PMID:18440775]	81	386	5	18123	0.0129534	0.0617284	Higher in GroupD	['GO:0071363']
GO:BP	GO:0035914	skeletal muscle cell differentiation	1	FALSE	"The process in which a relatively unspecialized cell acquires specialized features of a skeletal muscle cell, a somatic cell located in skeletal muscle." [CL:0000188, GOC:BHF, GOC:vk]	70	2256	12	18123	0.00531915	0.171429	Higher in GroupD	['GO:0007519', 'GO:0030154']
GO:BP	GO:0035909	aorta morphogenesis	1	FALSE	"The process in which the anatomical structures of an aorta are generated and organized. An aorta is an artery that carries blood from the heart to other parts of the body." [GOC:bf, GOC:dgh, MA:0000062, UBERON:0000947, Wikipedia:Aorta]	35	151	1	18123	0.00662252	0.0285714	Higher in GroupD	['GO:0035904', 'GO:0048844']
GO:BP	GO:0035907	dorsal aorta development	1	FALSE	"The progression of the dorsal aorta over time, from its initial formation to the mature structure. The dorsal aorta is a blood vessel in a single-pass circulatory system that carries oxygenated blood from the gills to the rest of the body. In a single-pass circulatory system blood passes once through the heart to supply the body once." [GOC:bf, GOC:dgh, UBERON:0005805, Wikipedia:Aorta, ZFA:00000…	10	1499	2	18123	0.00133422	0.2	Higher in GroupD	['GO:0035904']
GO:BP	GO:0035904	aorta development	1	FALSE	"The progression of the aorta over time, from its initial formation to the mature structure. An aorta is an artery that carries blood from the heart to other parts of the body." [GOC:bf, GOC:dgh, MA:0000062, UBERON:0000947, Wikipedia:Aorta]	59	1555	7	18123	0.00450161	0.118644	Higher in GroupD	['GO:0060840']
GO:BP	GO:0035902	response to immobilization stress	1	FALSE	"Any process that results in a change in state or activity of a cell or an organism (in terms of movement, secretion, enzyme production, gene expression, etc.) as a result of being rendered immobile." [GOC:bf, PMID:17683801, PMID:19893991]	28	1739	5	18123	0.00287522	0.178571	Higher in GroupD	['GO:0006950']
GO:BP	GO:0035891	exit from host cell	1	FALSE	"The directed movement of an organism out of a cell of the host organism. The host is defined as the larger of the organisms involved in a symbiotic interaction." [GOC:bf, GOC:rs, PMID:19325115]	35	826	3	18123	0.00363196	0.0857143	Higher in GroupD	['GO:0035890']
GO:BP	GO:0035890	exit from host	1	FALSE	"The directed movement of an organism out of the body, tissues or cells of the host organism. The host is defined as the larger of the organisms involved in a symbiotic interaction." [GOC:bf]	35	826	3	18123	0.00363196	0.0857143	Higher in GroupD	['GO:0052126']
GO:BP	GO:0035886	vascular associated smooth muscle cell differentiation	1	FALSE	"The process in which a relatively unspecialized cell acquires specialized features of a vascular smooth muscle cell." [GOC:sl, PMID:16151017, PMID:18267954]	44	645	3	18123	0.00465116	0.0681818	Higher in GroupD	['GO:0001944', 'GO:0051145']
GO:BP	GO:0035883	enteroendocrine cell differentiation	1	FALSE	"The process in which a relatively unspecialized cell acquires specialized structural and/or functional features of an enteroendocrine cell. Enteroendocrine cells are hormonally active epithelial cells in the gut that constitute the diffuse neuroendocrine system." [CL:0000164, GOC:bf]	32	984	2	18123	0.00203252	0.0625	Higher in GroupD	['GO:0002067']
GO:BP	GO:0035881	amacrine cell differentiation	1	FALSE	"The process in which a relatively unspecialized cell acquires specialized features of an amacrine cell, an interneuron generated in the inner nuclear layer (INL) of the vertebrate retina. Amacrine cells integrate, modulate, and interpose a temporal domain in the visual message presented to the retinal ganglion cells, with which they synapse in the inner plexiform layer. Amacrine cells lack large…	8	2594	1	18123	0.000385505	0.125	Higher in GroupD	['GO:0003407', 'GO:0030182']
GO:BP	GO:0035880	embryonic nail plate morphogenesis	1	FALSE	"The process, occurring in the embryo, by which the anatomical structures of a nail plate are generated and organized. The nail plate is the hard and translucent portion of the nail, composed of keratin, and serves to protect the tips of digits." [GOC:BHF, GOC:vk, ISBN:0323025781, PMID:11369996, UBERON:0008198, Wikipedia:Nail_(anatomy)]	2	669	1	18123	0.00149477	0.5	Higher in GroupD	['GO:0035878', 'GO:0042733', 'GO:0048598']
GO:BP	GO:0035878	nail development	1	FALSE	"The process whose specific outcome is the progression of a nail over time, from its formation to the mature structure. A nail is a horn-like envelope covering the outer end of a finger or toe, and consists of the nail plate, the nail matrix and the nail bed below it, and the grooves surrounding it." [GOC:bf, ISBN:0323025781, UBERON:0001705, Wikipedia:Nail_(anatomy)]	8	669	1	18123	0.00149477	0.125	Higher in GroupD	['GO:0048856', 'GO:0060173']
GO:BP	GO:0038094	Fc-gamma receptor signaling pathway	1	FALSE	"A series of molecular signals initiated by the binding of the Fc portion of immunoglobulin G (IgG) to an Fc-gamma receptor on the surface of a signal-receiving cell, and ending with regulation of a downstream cellular process, e.g. transcription. The Fc portion of an immunoglobulin is its C-terminal constant region." [GOC:phg, PMID:11244038]	137	333	1	18123	0.003003	0.00729927	Higher in GroupD	['GO:0038093']
GO:BP	GO:0036152	phosphatidylethanolamine acyl-chain remodeling	1	FALSE	"Remodeling the acyl chains of phosphatidylethanolamine, through sequential deacylation and re-acylation reactions, to generate phosphatidylethanolamine containing different types of fatty acid acyl chains." [GOC:mw, PMID:18287005, PMID:18458083]	26	309	1	18123	0.00323625	0.0384615	Higher in GroupD	['GO:0046470']
GO:BP	GO:0036158	outer dynein arm assembly	1	FALSE	"The aggregation, arrangement and bonding together of a set of components to form an axonemal dynein outer arm, an outer arm structure present on the outer doublet microtubules of ciliary and flagellar axonemes." [GOC:BHF, GOC:vk, PMID:19944400]	22	2730	1	18123	0.0003663	0.0454545	Higher in GroupD	['GO:0070286']
GO:BP	GO:0036507	protein demannosylation	1	FALSE	"The removal of one or more mannose residues from a mannosylated protein." [GOC:bf, GOC:PARL, PMID:25092655]	24	1917	4	18123	0.00208659	0.166667	Higher in GroupD	['GO:0006517']
GO:BP	GO:0036503	ERAD pathway	1	FALSE	"The protein catabolic pathway which targets endoplasmic reticulum (ER)-resident proteins for degradation by the cytoplasmic proteasome. It begins with recognition of the ER-resident protein, includes retrotranslocation (dislocation) of the protein from the ER to the cytosol, protein modifications necessary for correct substrate transfer (e.g. ubiquitination), transport of the protein to the prot…	106	3	1	18123	0.333333	0.00943396	Higher in GroupD	['GO:0010243', 'GO:0010498', 'GO:0034976']
GO:BP	GO:0036499	PERK-mediated unfolded protein response	1	FALSE	"A series of molecular signals mediated by the endoplasmic reticulum membrane stress sensor PERK (PKR-like ER kinase). Begins with activation of PERK in response to endoplasmic reticulum (ER) stress and ends with regulation of a downstream cellular process, e.g. transcription. The main substrate of PERK is the translation initiation factor eIF2alpha. Serine-phosphorylation of eIF2alpha by PERK in…	22	1797	3	18123	0.00166945	0.136364	Higher in GroupD	['GO:0006984', 'GO:0030968', 'GO:0140467']
GO:BP	GO:0036498	IRE1-mediated unfolded protein response	1	FALSE	"A series of molecular signals mediated by the endoplasmic reticulum stress sensor IRE1 (Inositol-requiring transmembrane kinase/endonuclease). Begins with activation of IRE1 in response to endoplasmic reticulum (ER) stress, and ends with regulation of a downstream cellular process, e.g. transcription. One target of activated IRE1 is the transcription factor HAC1 in yeast, or XBP1 in mammals; IRE…	66	1275	7	18123	0.0054902	0.106061	Higher in GroupD	['GO:0030968']
GO:BP	GO:0036497	eIF2alpha dephosphorylation in response to endoplasmic reticulum stress	1	FALSE	"The removal of a phosphate group from the translation initiation factor eIF2alpha, as a result of endoplasmic reticulum stress." [GOC:bf, GOC:PARL, PMID:16835242]	1	1622	1	18123	0.000616523	1	Higher in GroupD	['GO:0036491', 'GO:0036496']
GO:BP	GO:0036496	regulation of translational initiation by eIF2 alpha dephosphorylation	1	FALSE	"Any process that modulates the frequency, rate or extent of translation initiation in response to stress by the dephosphorylation of eIF2 alpha." [GOC:bf, GOC:PARL]	2	1622	1	18123	0.000616523	0.5	Higher in GroupD	['GO:0006470', 'GO:0032535', 'GO:0043558']
GO:BP	GO:0036508	protein alpha-1,2-demannosylation	1	FALSE	"The removal of one or more alpha 1,2-linked mannose residues from a mannosylated protein." [GOC:bf, GOC:PARL, PMID:21062743, PMID:25092655]	24	1917	4	18123	0.00208659	0.166667	Higher in GroupD	['GO:0036507']
GO:BP	GO:0036493	positive regulation of translation in response to endoplasmic reticulum stress	1	FALSE	"Any process that activates, or increases the frequency, rate or extent of translation as a result of endoplasmic reticulum stress." [GOC:bf, GOC:PARL]	5	1768	1	18123	0.000565611	0.2	Higher in GroupD	['GO:0032056', 'GO:0036490']
GO:BP	GO:0036490	regulation of translation in response to endoplasmic reticulum stress	1	FALSE	"Modulation of the frequency, rate or extent of translation as a result of endoplasmic reticulum stress." [GOC:bf, GOC:PARL, PMID:14676213, PMID:16835242]	11	1768	2	18123	0.00113122	0.181818	Higher in GroupD	['GO:0034976', 'GO:0043555']
GO:BP	GO:0036480	neuron intrinsic apoptotic signaling pathway in response to oxidative stress	1	FALSE	"A series of molecular signals in which an intracellular signal is conveyed to trigger the apoptotic death of a neuron. The pathway is induced in response to oxidative stress, a state often resulting from exposure to high levels of reactive oxygen species, and ends when the execution phase of apoptosis is triggered." [GOC:bf, GOC:PARL, PMID:23858059]	8	970	2	18123	0.00206186	0.25	Higher in GroupD	['GO:0008631', 'GO:0036475', 'GO:0051402']
GO:BP	GO:0036475	neuron death in response to oxidative stress	1	FALSE	"Any biological process that results in permanent cessation of all vital functions of a neuron upon exposure to an oxidative stress stimulus." [GOC:bf, GOC:PARL]	30	2465	6	18123	0.00243408	0.2	Higher in GroupD	['GO:0036473', 'GO:0070997']
GO:BP	GO:0036474	cell death in response to hydrogen peroxide	1	FALSE	"Any biological process that results in permanent cessation of all vital functions of a cell upon exposure to hydrogen peroxide (H2O2)." [GOC:bf, GOC:PARL]	35	1260	1	18123	0.000793651	0.0285714	Higher in GroupD	['GO:0036473', 'GO:0070301']
GO:BP	GO:0036473	cell death in response to oxidative stress	1	FALSE	"Any biological process that results in permanent cessation of all vital functions of a cell upon exposure to an oxidative stress stimulus." [GOC:bf, GOC:PARL]	99	269	1	18123	0.00371747	0.010101	Higher in GroupD	['GO:0008219', 'GO:0034599']
GO:BP	GO:0036466	synaptic vesicle recycling via endosome	1	FALSE	"Synaptic vesicle recycling where vesicles endocytosed via clathrin-coated pits re-acidify and refill with neurotransmitters after passing through an endosomal intermediate." [GOC:aruk, GOC:bc, GOC:bf, GOC:dos, GOC:pad, GOC:PARL, PMID:15217342]	7	905	1	18123	0.00110497	0.142857	Higher in GroupD	['GO:0036465', 'GO:0046907', 'GO:0099532']
GO:BP	GO:0036491	regulation of translation initiation in response to endoplasmic reticulum stress	1	FALSE	"Any process that modulates the frequency, rate or extent of translation initiation, as a result of endoplasmic reticulum stress." [GOC:bf, GOC:PARL, PMID:14676213, PMID:16835242]	8	1622	1	18123	0.000616523	0.125	Higher in GroupD	['GO:0036490', 'GO:0043558']
GO:BP	GO:0038001	paracrine signaling	1	FALSE	"The transfer of information from one cell to another, where the signal travels from the signal-producing cell to the receiving cell by passive diffusion or bulk flow in intercellular fluid. The signaling cell and the receiving cell are usually in the vicinity of each other." [GOC:mtg_signaling_feb11, ISBN:3527303782]	7	2658	3	18123	0.00112867	0.428571	Higher in GroupD	['GO:0007267']
GO:BP	GO:0038003	G protein-coupled opioid receptor signaling pathway	1	FALSE	"The series of molecular signals generated as a consequence of an opioid receptor binding to one of its physiological ligands." [GOC:bf, PMID:20494127]	12	328	1	18123	0.00304878	0.0833333	Higher in GroupD	['GO:0007186']
GO:BP	GO:0038007	netrin-activated signaling pathway	1	FALSE	"A series of molecular events initiated by the binding of a netrin protein to a receptor on the surface of the target cell, and ending with regulation of a downstream cellular process, e.g. transcription. Netrins can act as chemoattractant signals for some cells and chemorepellent signals for others. Netrins also have roles outside of cell and axon guidance." [GOC:signaling, PMID:10399919, PMID:1…	13	968	1	18123	0.00103306	0.0769231	Higher in GroupD	['GO:0007166']
GO:BP	GO:0038092	nodal signaling pathway	1	FALSE	"A series of molecular signals initiated by the binding of a nodal protein to an activin receptor on the surface of a target cell, and ending with regulation of a downstream cellular process, e.g. transcription." [GOC:BHF, GOC:vk, PMID:17287255]	18	1345	1	18123	0.000743494	0.0555556	Higher in GroupD	['GO:0032924']
GO:BP	GO:0038091	positive regulation of cell proliferation by VEGF-activated platelet derived growth factor receptor signaling pathway	1	FALSE	"A series of molecular signals initiated by the binding of a vascular endothelial growth factor (VEGF) to a platelet-derived growth factor receptor (PDGFR) on the surface of a cell, which activates or increases the frequency, rate or extent of cell proliferation." [GOC:signaling, PMID:17470632]	3	645	1	18123	0.00155039	0.333333	Higher in GroupD	['GO:0008284', 'GO:0038086']
GO:BP	GO:0038089	positive regulation of cell migration by vascular endothelial growth factor signaling pathway	1	FALSE	"A series of molecular signals initiated by the binding of a vascular endothelial growth factor (VEGF) to a receptor on the surface of a cell, which activates or increases the frequency, rate or extent of the orderly movement of a cell from one site to another." [GOC:bf, GOC:signaling]	8	645	1	18123	0.00155039	0.125	Higher in GroupD	['GO:0030335', 'GO:0038084']
GO:BP	GO:0038086	VEGF-activated platelet-derived growth factor receptor signaling pathway	1	FALSE	"A series of molecular signals initiated by the binding of a vascular endothelial growth factor (VEGF) to a platelet-derived growth factor receptor (PDGFR) on the surface of a cell, and ending with regulation of a downstream cellular process, e.g. transcription." [GOC:signaling, PMID:17470632]	3	645	1	18123	0.00155039	0.333333	Higher in GroupD	['GO:0038084', 'GO:0048008']
GO:BP	GO:0038084	vascular endothelial growth factor signaling pathway	1	FALSE	"A series of molecular signals initiated by the binding of a vascular endothelial growth factor (VEGF) to a receptor on the surface of the target cell, and ending with regulation of a downstream cellular process, e.g. transcription." [GOC:signaling, PMID:17470632]	54	178	2	18123	0.011236	0.037037	Higher in GroupD	['GO:0007169', 'GO:0035924']
GO:BP	GO:0038083	peptidyl-tyrosine autophosphorylation	1	FALSE	"The phosphorylation by a protein of one or more of its own tyrosine amino acid residues, or a tyrosine residue on an identical protein." [PMID:10037737, PMID:10068444, PMID:10940390]	23	1028	5	18123	0.00486381	0.217391	Higher in GroupD	['GO:0018108', 'GO:0046777']
GO:BP	GO:0038066	p38MAPK cascade	1	FALSE	"An intracellular protein kinase cascade containing at least a p38 MAPK, a MAPKK and a MAP3K. The cascade can also contain an additional tier: the upstream MAP4K. The kinases in each tier phosphorylate and activate the kinases in the downstream tier to transmit a signal within a cell." [GOC:signaling, PMID:20811974]	53	645	6	18123	0.00930233	0.113208	Higher in GroupD	['GO:0051403']
GO:BP	GO:0038065	collagen-activated signaling pathway	1	FALSE	"A series of molecular signals initiated by collagen binding to a cell surface receptor, and ending with regulation of a downstream cellular process, e.g. transcription." [GOC:bf, GOC:uh, PMID:21568710]	15	511	2	18123	0.00391389	0.133333	Higher in GroupD	['GO:0007166']
GO:BP	GO:0038063	collagen-activated tyrosine kinase receptor signaling pathway	1	FALSE	"A series of molecular signals initiated by the binding of collagen to a receptor on the surface of the target cell where the receptor possesses tyrosine kinase activity. The pathway ends with regulation of a downstream cellular process, e.g. transcription." [GOC:bf, GOC:uh, PMID:15888913, PMID:16626936]	12	511	2	18123	0.00391389	0.166667	Higher in GroupD	['GO:0007169', 'GO:0038065']
GO:BP	GO:0038034	signal transduction in absence of ligand	1	FALSE	"A series of molecular signals initiated by the absence of a ligand or the withdrawal of a ligand from a receptor." [GOC:al, GOC:ppm, GOC:pr, PMID:15044679]	72	1275	13	18123	0.0101961	0.180556	Higher in GroupD	['GO:0007165']
GO:BP	GO:0038033	positive regulation of endothelial cell chemotaxis by VEGF-activated vascular endothelial growth factor receptor signaling pathway	1	FALSE	"A series of molecular signals initiated by the binding of a vascular endothelial growth factor (VEGF) to a VEGFR on the surface of a cell, which activates or increases the frequency, rate or extent of endothelial cell chemotaxis." [GOC:bf, GOC:BHF, GOC:rl, PMID:21245381]	5	645	1	18123	0.00155039	0.2	Higher in GroupD	['GO:0038089', 'GO:0048010', 'GO:2001028']
GO:BP	GO:0038027	apolipoprotein A-I-mediated signaling pathway	1	FALSE	"A series of molecular signals initiated by the binding of apolipoprotein A-I to a receptor on the surface of a cell, and ending with regulation of a downstream cellular process, e.g. transcription." [GOC:bf, GOC:signaling, PMID:16443932]	8	754	1	18123	0.00132626	0.125	Higher in GroupD	['GO:0007166']
GO:BP	GO:0038026	reelin-mediated signaling pathway	1	FALSE	"A series of molecular signals initiated by the binding of reelin (a secreted glycoprotein) to a receptor on the surface of a target cell, and ending with regulation of a downstream cellular process, e.g. transcription." [GOC:bf, PMID:12827279, PMID:20223215]	9	1188	3	18123	0.00252525	0.333333	Higher in GroupD	['GO:0007166']
GO:BP	GO:0038018	Wnt receptor catabolic process	1	FALSE	"The chemical reactions and pathways resulting in the breakdown of a Wnt receptor. Internalized Wnt receptors can be recycled to the plasma membrane or sorted to lysosomes for protein degradation." [GOC:BHF, GOC:rl, GOC:signaling, PMID:19643732]	2	1959	1	18123	0.000510465	0.5	Higher in GroupD	['GO:0030178', 'GO:0032801']
GO:BP	GO:0038016	insulin receptor internalization	1	FALSE	"A receptor-mediated endocytosis process that results in the movement of an insulin receptor from the plasma membrane to the inside of the cell." [GOC:bf, PMID:3907718, PMID:9609114]	3	2618	1	18123	0.000381971	0.333333	Higher in GroupD	['GO:0031623']
GO:BP	GO:0036465	synaptic vesicle recycling	1	FALSE	"The trafficking of synaptic vesicles from the pre-synaptic membrane so the vesicle can dock and prime for another round of exocytosis and neurotransmitter release. Recycling occurs after synaptic vesicle exocytosis, and is necessary to replenish presynaptic vesicle pools, sustain transmitter release and preserve the structural integrity of the presynaptic membrane. Recycling can occur following …	77	1722	10	18123	0.0058072	0.12987	Higher in GroupD	['GO:0006810', 'GO:0051649', 'GO:0099504']
GO:BP	GO:0036446	myofibroblast differentiation	1	FALSE	"The process in which an undifferentiated cell acquires the features of a myofibroblast cell." [CL:0000186, GOC:nhn]	7	2104	1	18123	0.000475285	0.142857	Higher in GroupD	['GO:0030154']
GO:BP	GO:0036444	calcium import into the mitochondrion	1	FALSE	"A process in which a calcium ion (Ca2+) is transported from the cytosol into the mitochondrial matrix." [GOC:vw]	14	800	2	18123	0.0025	0.142857	Higher in GroupD	['GO:0006851', 'GO:0060401', 'GO:0070509', 'GO:1990542']
GO:BP	GO:0036438	maintenance of lens transparency	1	FALSE	"A homeostatic process in which the lens is maintained in a highly refractive, transparent state to allow for optimal focusing of light on the retina." [GOC:nhn, PMID:22095752]	4	1020	1	18123	0.000980392	0.25	Higher in GroupD	['GO:0001894']
GO:BP	GO:0036297	interstrand cross-link repair	1	FALSE	"Removal of a DNA interstrand crosslink (a covalent attachment of DNA bases on opposite strands of the DNA) and restoration of the DNA. DNA interstrand crosslinks occur when both strands of duplex DNA are covalently tethered together (e.g. by an exogenous or endogenous agent), thus preventing the strand unwinding necessary for essential DNA functions such as transcription and replication." [GOC:v…	57	809	1	18123	0.00123609	0.0175439	Higher in GroupD	['GO:0006281']
GO:BP	GO:0036296	response to increased oxygen levels	1	FALSE	"Any process that results in a change in state or activity of a cell or an organism (in terms of movement, secretion, enzyme production, gene expression, etc.) as a result of a stimulus reflecting an increase in the level of oxygen." [GOC:al]	30	756	4	18123	0.00529101	0.133333	Higher in GroupD	['GO:0070482']
GO:BP	GO:0036295	cellular response to increased oxygen levels	1	FALSE	"Any process that results in a change in state or activity of a cell (in terms of movement, secretion, enzyme production, gene expression, etc.) as a result of a stimulus reflecting an increase in the level of oxygen." [GOC:al]	14	750	2	18123	0.00266667	0.142857	Higher in GroupD	['GO:0036296', 'GO:0071453']
GO:BP	GO:0036290	protein trans-autophosphorylation	1	FALSE	"The phosphorylation by a protein of a residue on an identical protein. For example, phosphorylation by the other kinase within a homodimer." [GOC:jsg, PMID:20516151]	1	323	1	18123	0.00309598	1	Higher in GroupD	['GO:0046777']
GO:BP	GO:0036289	peptidyl-serine autophosphorylation	1	FALSE	"The phosphorylation by a protein of one or more of its own serine amino acid residues, or a serine residue on an identical protein." [GOC:pm]	9	323	2	18123	0.00619195	0.222222	Higher in GroupD	['GO:0018105', 'GO:0046777']
GO:BP	GO:0036268	swimming	1	FALSE	"Self-propelled movement of an organism from one location to another through water, often by means of active fin movement." [GOC:cvs, PMID:22459995]	1	454	1	18123	0.00220264	1	Higher in GroupD	['GO:0040011']
GO:BP	GO:0036265	RNA (guanine-N7)-methylation	1	FALSE	"The addition of a methyl group to the N7 atom in the base portion of a guanine nucleotide residue in an RNA molecule." [GOC:BHF, GOC:rl]	7	1872	3	18123	0.00160256	0.428571	Higher in GroupD	['GO:0001510']
GO:BP	GO:0036260	RNA capping	1	FALSE	"The sequence of enzymatic reactions by which a cap structure is added to the 5' end of nascent RNA polymerase transcripts. Examples of RNA capping include 7-methyl-G caps found on all RNA polymerase II transcripts and nucleotide-containing cofactor caps, such as NAD(H) or FAD, found on bacterial trancripts." [GOC:bf, GOC:krc, GOC:mah, PMID:18775984, PMID:27383794, PMID:29681497, PMID:30353673]	34	719	3	18123	0.00417246	0.0882353	Higher in GroupD	['GO:0006396']
GO:BP	GO:0036258	multivesicular body assembly	1	FALSE	"The aggregation, arrangement and bonding together of a set of components to form a multivesicular body, a type of late endosome in which regions of the limiting endosomal membrane invaginate to form internal vesicles; membrane proteins that enter the internal vesicles are sequestered from the cytoplasm." [GOC:sart, PMID:11566881, PMID:19571114]	30	242	1	18123	0.00413223	0.0333333	Higher in GroupD	['GO:0036257', 'GO:0070925']
GO:BP	GO:0036257	multivesicular body organization	1	FALSE	"A process that is carried out at the cellular level which results in the assembly, arrangement of constituent parts, or disassembly of a multivesicular body. A multivesicular body is a type of late endosome in which regions of the limiting endosomal membrane invaginate to form internal vesicles; membrane proteins that enter the internal vesicles are sequestered from the cytoplasm." [GOC:sart, PM…	31	242	1	18123	0.00413223	0.0322581	Higher in GroupD	['GO:0007032']
GO:BP	GO:0036255	response to methylamine	1	FALSE	"Any process that results in a change in state or activity of a cell or an organism (in terms of movement, secretion, enzyme production, gene expression, etc.) as a result of a methylamine stimulus." [GOC:mah]	1	1654	1	18123	0.000604595	1	Higher in GroupD	['GO:0014075']
GO:BP	GO:0036230	granulocyte activation	1	FALSE	"The change in morphology and behavior of a granulocyte resulting from exposure to a cytokine, chemokine, cellular ligand, or soluble factor." [CL:0000094, GOC:nhn]	509	108	6	18123	0.0555556	0.0117878	Higher in GroupD	['GO:0002274']
GO:BP	GO:0036228	protein localization to nuclear inner membrane	1	FALSE	"A process in which a protein is transported to, or maintained in, a location within the nuclear inner membrane." [GOC:dgf, PMID:16929305]	2	2500	1	18123	0.0004	0.5	Higher in GroupD	['GO:0072657', 'GO:0090435']
GO:BP	GO:0036166	phenotypic switching	1	FALSE	"A reversible switch of a cell from one cell type or form to another, at a frequency above the expected frequency for somatic mutations. Phenotypic switching involves changes in cell morphology and altered gene expression patterns. For example, Candida albicans switches from white cells to opaque cells for sexual mating. Phenotypic switching also occurs in multicellular organisms; smooth muscle c…	18	537	1	18123	0.0018622	0.0555556	Higher in GroupD	['GO:0009987']
GO:BP	GO:0036159	inner dynein arm assembly	1	FALSE	"The aggregation, arrangement and bonding together of a set of components to form an axonemal dynein inner arm, an inner arm structure present on the outer doublet microtubules of ciliary and flagellar axonemes." [GOC:BHF, GOC:vk, PMID:19944400]	16	2279	1	18123	0.000438789	0.0625	Higher in GroupD	['GO:0070286']
GO:BP	GO:0036301	macrophage colony-stimulating factor production	1	FALSE	"The appearance of macrophage colony-stimulating factor due to biosynthesis or secretion following a cellular stimulus, resulting in an increase in its intracellular or extracellular levels." [GOC:BHF, GOC:vk]	6	1211	1	18123	0.000825764	0.166667	Higher in GroupD	['GO:0001816']
GO:BP	GO:0036155	acylglycerol acyl-chain remodeling	1	FALSE	"Remodeling the acyl chains of an acylglycerol, through sequential deacylation and re-acylation reactions, to generate an acylglycerol containing different types of fatty acid acyl chains." [GOC:mw, PMID:15364929]	7	1965	1	18123	0.000508906	0.142857	Higher in GroupD	['GO:0006639']
GO:BP	GO:0036302	atrioventricular canal development	1	FALSE	"The progression of the atrioventricular canal over time, from its formation to the mature structure. The atrioventricular canal is the part of the heart connecting the atrium to the cardiac ventricle." [GOC:BHF, GOC:gr, PMID:14701881, UBERON:0002087, ZFA:0001315]	13	617	2	18123	0.00324149	0.153846	Higher in GroupD	['GO:0007507', 'GO:0048856']
GO:BP	GO:0036305	ameloblast differentiation	1	FALSE	"The process in which a relatively unspecialized cell acquires specialized features of an ameloblast, a cylindrical epithelial cell in the innermost layer of the enamel organ." [CL:0000059]	1	2434	1	18123	0.000410846	1	Higher in GroupD	['GO:0002065']
GO:BP	GO:0036416	tRNA stabilization	1	FALSE	"Prevention of degradation of tRNA molecules." [GOC:aa, GOC:bf, PMID:20459084]	2	1048	1	18123	0.000954198	0.5	Higher in GroupD	['GO:0036415', 'GO:0043489', 'GO:1902371']
GO:BP	GO:0036415	regulation of tRNA stability	1	FALSE	"Any process that modulates the propensity of transfer RNA (tRNA) molecules to degradation. Includes processes that both stabilize and destabilize tRNAs." [GOC:aa, PMID:21502523, PMID:23572593]	2	1048	1	18123	0.000954198	0.5	Higher in GroupD	['GO:0043487', 'GO:1902370']
GO:BP	GO:0036414	histone citrullination	1	FALSE	"The hydrolysis of peptidyl-arginine to form peptidyl-citrulline on a histone protein." [GOC:als, PMID:22853951, PMID:23175390]	5	1809	1	18123	0.000552792	0.2	Higher in GroupD	['GO:0016570', 'GO:0018101']
GO:BP	GO:0036378	calcitriol biosynthetic process from calciol	1	FALSE	"Conversion of vitamin D3 from its largely inactive form (calciol, also called cholecalciferol) into a hormonally active form (calcitriol). Conversion requires 25-hydroxylation of calciol in the liver to form calcidiol, and subsequent 1,alpha-hydroxylation of calcidiol in the kidney to form calcitriol." [GOC:BHF, GOC:rl, PMID:17426122, PMID:20511049]	4	1608	1	18123	0.000621891	0.25	Higher in GroupD	['GO:0042368', 'GO:0044108', 'GO:0046173', 'GO:0070640']
GO:BP	GO:0036376	sodium ion export across plasma membrane	1	FALSE	"The directed movement of sodium ions from inside of a cell, across the plasma membrane and into the extracellular region." [GOC:vw, PMID:14674689]	15	21	1	18123	0.047619	0.0666667	Higher in GroupD	['GO:0035725', 'GO:0070839', 'GO:0140115']
GO:BP	GO:0036371	protein localization to T-tubule	1	FALSE	"A process in which a protein is transported to, or maintained in, the T-tubule. The T-tubule is an invagination of the plasma membrane of a muscle cell that extends inward from the cell surface around each myofibril." [GOC:BHF, GOC:rl, PMID:16292983]	2	1938	1	18123	0.000515996	0.5	Higher in GroupD	['GO:0072659']
GO:BP	GO:0036369	transcription factor catabolic process	1	FALSE	"The chemical reactions and pathways resulting in the breakdown of a sequence-specific DNA-binding transcription factor by hydrolysis of its peptide bonds, initiated by the covalent attachment of ubiquitin, and mediated by the proteasome." [GOC:al, GOC:vw, PMID:22833559]	5	1126	1	18123	0.000888099	0.2	Higher in GroupD	['GO:0043161']
GO:BP	GO:0036363	transforming growth factor beta activation	1	FALSE	"The release of transforming growth factor beta (TGF-beta) from its latent state. TGF-beta is secreted as part of a large latent complex (LLC) that is targeted to the extracellular matrix. Release of TGFbeta from its latent state is required for TGFbeta to bind to its receptors, and can occur by a variety of mechanisms." [GOC:bf, GOC:sl, PMID:12482908, PMID:9170210]	10	617	1	18123	0.00162075	0.1	Higher in GroupD	['GO:0032501', 'GO:0071604']
GO:BP	GO:0036353	histone H2A-K119 monoubiquitination	1	FALSE	"The modification of histone H2A by addition of a single ubiquitin group to lysine-119 (H2A- K119) in metazoans, and at the equivalent residue in other organisms." [GOC:sp, PMID:15386022]	8	504	2	18123	0.00396825	0.25	Higher in GroupD	['GO:0035518']
GO:BP	GO:0036344	platelet morphogenesis	1	FALSE	"Generation and organization of a platelet, a non-nucleated disk-shaped cell formed by extrusion from megakaryocytes, found in the blood of all mammals, and mainly involved in blood coagulation." [CL:0000233, GOC:BHF, GOC:vk]	19	1076	2	18123	0.00185874	0.105263	Higher in GroupD	['GO:0000904']
GO:BP	GO:0036342	post-anal tail morphogenesis	1	FALSE	"The process in which a post-anal tail is generated and organized. A post-anal tail is a muscular region of the body that extends posterior to the anus. The post-anal tail may aid locomotion and balance." [GOC:bf, GOC:kmv, Wikipedia:Chordate]	17	74	2	18123	0.027027	0.117647	Higher in GroupD	['GO:0009653']
GO:BP	GO:0036336	dendritic cell migration	1	FALSE	"The movement of a dendritic cell within or between different tissues and organs of the body." [CL:0000451, GOC:nhn, PMID:19339990]	32	162	3	18123	0.0185185	0.09375	Higher in GroupD	['GO:0071674']
GO:BP	GO:0036335	intestinal stem cell homeostasis	1	FALSE	"Any biological process involved in the maintenance of the steady-state number of intestinal stem cells within a population of cells." [GOC:nhn, PMID:22042863]	3	1187	1	18123	0.00084246	0.333333	Higher in GroupD	['GO:0048872']
GO:BP	GO:0036324	vascular endothelial growth factor receptor-2 signaling pathway	1	FALSE	"Any series of molecular signals initiated by the binding of an extracellular ligand to a vascular endothelial growth factor receptor-2 (VEGFR-2) located on the surface of the receiving cell, and ending with regulation of a downstream cellular process, e.g. transcription." [GOC:bf, GOC:uh, PMID:12967471, Wikipedia:Kinase_insert_domain_receptor, Wikipedia:VEGF_receptors]	5	645	1	18123	0.00155039	0.2	Higher in GroupD	['GO:0048010']
GO:BP	GO:0036314	response to sterol	1	FALSE	"Any process that results in a change in state or activity of a cell or an organism (in terms of movement, secretion, enzyme production, gene expression, etc.) as a result of a sterol stimulus." [GOC:bf]	35	206	2	18123	0.00970874	0.0571429	Higher in GroupD	['GO:0014070', 'GO:0033993', 'GO:1901700']
GO:BP	GO:0035148	tube formation	1	FALSE	"Creation of the central hole of a tube in an anatomical structure through which gases and/or liquids flow." [GOC:bf]	151	7	1	18123	0.142857	0.00662252	Higher in GroupD	['GO:0035239', 'GO:0048646']
GO:BP	GO:0035137	hindlimb morphogenesis	1	FALSE	"The process in which the anatomical structures of the hindlimb are generated and organized." [GOC:go_curators]	34	151	1	18123	0.00662252	0.0294118	Higher in GroupD	['GO:0035108']
GO:BP	GO:0000002	mitochondrial genome maintenance	1	FALSE	"The maintenance of the structure and integrity of the mitochondrial genome; includes replication and segregation of the mitochondrial chromosome." [GOC:ai, GOC:vw]	21	15	1	18123	0.0666667	0.047619	Higher in GroupB	['GO:0007005']
GO:BP	GO:0035113	embryonic appendage morphogenesis	1	FALSE	"The process, occurring in the embryo, by which the anatomical structures of the appendage are generated and organized. An appendage is an organ or part that is attached to the trunk of an organism, such as a limb or a branch." [ISBN:0582227089]	119	151	2	18123	0.013245	0.0168067	Higher in GroupD	['GO:0035107', 'GO:0048598']
GO:BP	GO:0032703	negative regulation of interleukin-2 production	1	FALSE	"Any process that stops, prevents, or reduces the frequency, rate, or extent of interleukin-2 production." [GOC:mah]	27	191	1	18123	0.0052356	0.037037	Higher in GroupD	['GO:0001818', 'GO:0032623', 'GO:0032663']
GO:BP	GO:0032700	negative regulation of interleukin-17 production	1	FALSE	"Any process that stops, prevents, or reduces the frequency, rate, or extent of production of any member of the interleukin-17 family of cytokines." [GOC:add, GOC:mah, PMID:16482511]	25	387	3	18123	0.00775194	0.12	Higher in GroupD	['GO:0001818', 'GO:0032620', 'GO:0032660']
GO:BP	GO:0032695	negative regulation of interleukin-12 production	1	FALSE	"Any process that stops, prevents, or reduces the frequency, rate, or extent of interleukin-12 production." [GOC:mah]	18	120	1	18123	0.00833333	0.0555556	Higher in GroupD	['GO:0001818', 'GO:0032615', 'GO:0032655']
GO:BP	GO:0032693	negative regulation of interleukin-10 production	1	FALSE	"Any process that stops, prevents, or reduces the frequency, rate, or extent of interleukin-10 production." [GOC:mah]	22	317	3	18123	0.00946372	0.136364	Higher in GroupD	['GO:0001818', 'GO:0032613', 'GO:0032653']
GO:BP	GO:0032692	negative regulation of interleukin-1 production	1	FALSE	"Any process that stops, prevents, or reduces the frequency, rate, or extent of interleukin-1 production." [GOC:mah]	49	120	1	18123	0.00833333	0.0204082	Higher in GroupD	['GO:0001818', 'GO:0032612', 'GO:0032652']
GO:BP	GO:0032691	negative regulation of interleukin-1 beta production	1	FALSE	"Any process that stops, prevents, or reduces the frequency, rate, or extent of interleukin-1 beta production." [GOC:mah]	42	120	1	18123	0.00833333	0.0238095	Higher in GroupD	['GO:0032611', 'GO:0032651', 'GO:0032692']
GO:BP	GO:0032689	negative regulation of interferon-gamma production	1	FALSE	"Any process that stops, prevents, or reduces the frequency, rate, or extent of interferon-gamma production. Interferon-gamma is also known as type II interferon." [GOC:add, GOC:mah, PMID:15546383]	45	1292	7	18123	0.00541796	0.155556	Higher in GroupD	['GO:0001818', 'GO:0032609', 'GO:0032649']
GO:BP	GO:0032688	negative regulation of interferon-beta production	1	FALSE	"Any process that stops, prevents, or reduces the frequency, rate, or extent of interferon-beta production." [GOC:mah, PMID:15546383]	13	345	1	18123	0.00289855	0.0769231	Higher in GroupD	['GO:0032480', 'GO:0032608', 'GO:0032648']
GO:BP	GO:0032712	negative regulation of interleukin-3 production	1	FALSE	"Any process that stops, prevents, or reduces the frequency, rate, or extent of interleukin-3 production." [GOC:mah]	1	1211	1	18123	0.000825764	1	Higher in GroupD	['GO:0001818', 'GO:0032632', 'GO:0032672']
GO:BP	GO:0032687	negative regulation of interferon-alpha production	1	FALSE	"Any process that stops, prevents, or reduces the frequency, rate, or extent of interferon-alpha production." [GOC:mah, PMID:15546383]	6	1211	1	18123	0.000825764	0.166667	Higher in GroupD	['GO:0032480', 'GO:0032607', 'GO:0032647']
GO:BP	GO:0032680	regulation of tumor necrosis factor production	1	FALSE	"Any process that modulates the frequency, rate or extent of tumor necrosis factor production." [GOC:mah, PMID:10891884, PMID:15560120]	180	343	7	18123	0.0204082	0.0388889	Higher in GroupD	['GO:0032640', 'GO:1903555']
GO:BP	GO:0032679	regulation of TRAIL production	1	FALSE	"Any process that modulates the frequency, rate, or extent of TRAIL production." [GOC:mah]	2	2217	1	18123	0.00045106	0.5	Higher in GroupD	['GO:0032639', 'GO:1903555']
GO:BP	GO:0032677	regulation of interleukin-8 production	1	FALSE	"Any process that modulates the frequency, rate, or extent of interleukin-8 production." [GOC:mah]	104	5	1	18123	0.2	0.00961538	Higher in GroupD	['GO:0001817', 'GO:0032637']
GO:BP	GO:0032675	regulation of interleukin-6 production	1	FALSE	"Any process that modulates the frequency, rate, or extent of interleukin-6 production." [GOC:mah]	172	5	1	18123	0.2	0.00581395	Higher in GroupD	['GO:0001817', 'GO:0032635']
GO:BP	GO:0032674	regulation of interleukin-5 production	1	FALSE	"Any process that modulates the frequency, rate, or extent of interleukin-5 production." [GOC:mah]	19	48	1	18123	0.0208333	0.0526316	Higher in GroupD	['GO:0001817', 'GO:0032634']
GO:BP	GO:0032673	regulation of interleukin-4 production	1	FALSE	"Any process that modulates the frequency, rate, or extent of interleukin-4 production." [GOC:mah, PMID:29778524]	33	1211	5	18123	0.00412882	0.151515	Higher in GroupD	['GO:0001817', 'GO:0032633']
GO:BP	GO:0032672	regulation of interleukin-3 production	1	FALSE	"Any process that modulates the frequency, rate, or extent of interleukin-3 production." [GOC:mah]	2	1211	1	18123	0.000825764	0.5	Higher in GroupD	['GO:0001817', 'GO:0032632']
GO:BP	GO:0032667	regulation of interleukin-23 production	1	FALSE	"Any process that modulates the frequency, rate, or extent of interleukin-23 production." [GOC:mah]	9	1861	1	18123	0.000537346	0.111111	Higher in GroupD	['GO:0001817', 'GO:0032627']
GO:BP	GO:0032682	negative regulation of chemokine production	1	FALSE	"Any process that stops, prevents, or reduces the frequency, rate, or extent of chemokine production." [GOC:mah]	28	120	2	18123	0.0166667	0.0714286	Higher in GroupD	['GO:0001818', 'GO:0032602', 'GO:0032642']
GO:BP	GO:0032663	regulation of interleukin-2 production	1	FALSE	"Any process that modulates the frequency, rate, or extent of interleukin-2 production." [GOC:mah]	62	431	4	18123	0.00928074	0.0645161	Higher in GroupD	['GO:0001817', 'GO:0032623']
GO:BP	GO:0032715	negative regulation of interleukin-6 production	1	FALSE	"Any process that stops, prevents, or reduces the frequency, rate, or extent of interleukin-6 production." [GOC:mah]	72	1992	5	18123	0.00251004	0.0694444	Higher in GroupD	['GO:0001818', 'GO:0032635', 'GO:0032675']
GO:BP	GO:0032720	negative regulation of tumor necrosis factor production	1	FALSE	"Any process that stops, prevents, or reduces the frequency, rate, or extent of tumor necrosis factor production." [GOC:mah, PMID:10891884, PMID:15560120]	77	1319	6	18123	0.0045489	0.0779221	Higher in GroupD	['GO:0032640', 'GO:0032680', 'GO:1903556']
GO:BP	GO:0032755	positive regulation of interleukin-6 production	1	FALSE	"Any process that activates or increases the frequency, rate, or extent of interleukin-6 production." [GOC:mah]	94	5	1	18123	0.2	0.0106383	Higher in GroupD	['GO:0001819', 'GO:0032635', 'GO:0032675']
GO:BP	GO:0032754	positive regulation of interleukin-5 production	1	FALSE	"Any process that activates or increases the frequency, rate, or extent of interleukin-5 production." [GOC:mah]	10	48	1	18123	0.0208333	0.1	Higher in GroupD	['GO:0001819', 'GO:0032634', 'GO:0032674']
GO:BP	GO:0032753	positive regulation of interleukin-4 production	1	FALSE	"Any process that activates or increases the frequency, rate, or extent of interleukin-4 production." [GOC:mah]	26	1211	5	18123	0.00412882	0.192308	Higher in GroupD	['GO:0001819', 'GO:0032633', 'GO:0032673']
GO:BP	GO:0032747	positive regulation of interleukin-23 production	1	FALSE	"Any process that activates or increases the frequency, rate, or extent of interleukin-23 production." [GOC:mah]	5	1861	1	18123	0.000537346	0.2	Higher in GroupD	['GO:0001819', 'GO:0032627', 'GO:0032667']
GO:BP	GO:0032743	positive regulation of interleukin-2 production	1	FALSE	"Any process that activates or increases the frequency, rate, or extent of interleukin-2 production." [GOC:mah]	34	721	4	18123	0.00554785	0.117647	Higher in GroupD	['GO:0001819', 'GO:0032623', 'GO:0032663']
GO:BP	GO:0032741	positive regulation of interleukin-18 production	1	FALSE	"Any process that activates or increases the frequency, rate, or extent of interleukin-18 production." [GOC:mah]	6	1102	1	18123	0.000907441	0.166667	Higher in GroupD	['GO:0001819', 'GO:0032621', 'GO:0032661']
GO:BP	GO:0032740	positive regulation of interleukin-17 production	1	FALSE	"Any process that activates or increases the frequency, rate, or extent of production of any member of the interleukin-17 family of cytokines." [GOC:add, GOC:mah, PMID:16482511]	22	1054	3	18123	0.0028463	0.136364	Higher in GroupD	['GO:0001819', 'GO:0032620', 'GO:0032660']
GO:BP	GO:0032736	positive regulation of interleukin-13 production	1	FALSE	"Any process that activates or increases the frequency, rate, or extent of interleukin-13 production." [GOC:mah]	13	48	1	18123	0.0208333	0.0769231	Higher in GroupD	['GO:0001819', 'GO:0032616', 'GO:0032656']
GO:BP	GO:0032717	negative regulation of interleukin-8 production	1	FALSE	"Any process that stops, prevents, or reduces the frequency, rate, or extent of interleukin-8 production." [GOC:mah]	39	5	1	18123	0.2	0.025641	Higher in GroupD	['GO:0001818', 'GO:0032637', 'GO:0032677']
GO:BP	GO:0032735	positive regulation of interleukin-12 production	1	FALSE	"Any process that activates or increases the frequency, rate, or extent of interleukin-12 production." [GOC:mah]	41	317	3	18123	0.00946372	0.0731707	Higher in GroupD	['GO:0001819', 'GO:0032615', 'GO:0032655']
GO:BP	GO:0032732	positive regulation of interleukin-1 production	1	FALSE	"Any process that activates or increases the frequency, rate, or extent of interleukin-1 production." [GOC:mah]	72	57	1	18123	0.0175439	0.0138889	Higher in GroupD	['GO:0001819', 'GO:0032612', 'GO:0032652']
GO:BP	GO:0032731	positive regulation of interleukin-1 beta production	1	FALSE	"Any process that activates or increases the frequency, rate, or extent of interleukin-1 beta production." [GOC:mah]	61	57	1	18123	0.0175439	0.0163934	Higher in GroupD	['GO:0032611', 'GO:0032651', 'GO:0032732']
GO:BP	GO:0032729	positive regulation of interferon-gamma production	1	FALSE	"Any process that activates or increases the frequency, rate, or extent of interferon-gamma production. Interferon-gamma is also known as type II interferon." [GOC:add, GOC:mah, PMID:15546383]	72	1211	10	18123	0.00825764	0.138889	Higher in GroupD	['GO:0001819', 'GO:0032609', 'GO:0032649']
GO:BP	GO:0032728	positive regulation of interferon-beta production	1	FALSE	"Any process that activates or increases the frequency, rate, or extent of interferon-beta production." [GOC:mah, PMID:15546383]	41	29	1	18123	0.0344828	0.0243902	Higher in GroupD	['GO:0032481', 'GO:0032608', 'GO:0032648']
GO:BP	GO:0032727	positive regulation of interferon-alpha production	1	FALSE	"Any process that activates or increases the frequency, rate, or extent of interferon-alpha production." [GOC:mah, PMID:15546383]	24	1768	2	18123	0.00113122	0.0833333	Higher in GroupD	['GO:0032481', 'GO:0032607', 'GO:0032647']
GO:BP	GO:0032725	positive regulation of granulocyte macrophage colony-stimulating factor production	1	FALSE	"Any process that activates or increases the frequency, rate, or extent of granulocyte macrophage colony-stimulating factor production." [GOC:mah]	14	427	2	18123	0.00468384	0.142857	Higher in GroupD	['GO:0001819', 'GO:0032604', 'GO:0032645', 'GO:0051247']
GO:BP	GO:0032724	positive regulation of fractalkine production	1	FALSE	"Any process that activates or increases the frequency, rate, or extent of fractalkine production." [GOC:mah]	2	1074	1	18123	0.000931099	0.5	Higher in GroupD	['GO:0032603', 'GO:0032644', 'GO:0032722']
GO:BP	GO:0032722	positive regulation of chemokine production	1	FALSE	"Any process that activates or increases the frequency, rate, or extent of chemokine production." [GOC:mah]	71	5	1	18123	0.2	0.0140845	Higher in GroupD	['GO:0001819', 'GO:0032602', 'GO:0032642']
GO:BP	GO:0032733	positive regulation of interleukin-10 production	1	FALSE	"Any process that activates or increases the frequency, rate, or extent of interleukin-10 production." [GOC:mah]	40	522	4	18123	0.00766284	0.1	Higher in GroupD	['GO:0001819', 'GO:0032613', 'GO:0032653']
GO:BP	GO:0032757	positive regulation of interleukin-8 production	1	FALSE	"Any process that activates or increases the frequency, rate, or extent of interleukin-8 production." [GOC:mah]	63	1189	6	18123	0.00504626	0.0952381	Higher in GroupD	['GO:0001819', 'GO:0032637', 'GO:0032677']
GO:BP	GO:0032661	regulation of interleukin-18 production	1	FALSE	"Any process that modulates the frequency, rate, or extent of interleukin-18 production." [GOC:mah, PMID:23710316]	12	1102	1	18123	0.000907441	0.0833333	Higher in GroupD	['GO:0001817', 'GO:0032621']
GO:BP	GO:0032656	regulation of interleukin-13 production	1	FALSE	"Any process that modulates the frequency, rate, or extent of interleukin-13 production." [GOC:mah]	20	48	1	18123	0.0208333	0.05	Higher in GroupD	['GO:0001817', 'GO:0032616']
GO:BP	GO:0032615	interleukin-12 production	1	FALSE	"The appearance of interleukin-12 due to biosynthesis or secretion following a cellular stimulus, resulting in an increase in its intracellular or extracellular levels." [GOC:mah]	61	317	4	18123	0.0126183	0.0655738	Higher in GroupD	['GO:0001816']
GO:BP	GO:0032613	interleukin-10 production	1	FALSE	"The appearance of interleukin-10 due to biosynthesis or secretion following a cellular stimulus, resulting in an increase in its intracellular or extracellular levels." [GOC:mah]	61	522	5	18123	0.00957854	0.0819672	Higher in GroupD	['GO:0001816']
GO:BP	GO:0032612	interleukin-1 production	1	FALSE	"The appearance of interleukin-1 due to biosynthesis or secretion following a cellular stimulus, resulting in an increase in its intracellular or extracellular levels." [GOC:mah]	127	120	2	18123	0.0166667	0.015748	Higher in GroupD	['GO:0001816']
GO:BP	GO:0032611	interleukin-1 beta production	1	FALSE	"The appearance of interleukin-1 beta due to biosynthesis or secretion following a cellular stimulus, resulting in an increase in its intracellular or extracellular levels." [GOC:mah]	109	120	2	18123	0.0166667	0.0183486	Higher in GroupD	['GO:0032612']
GO:BP	GO:0032609	interferon-gamma production	1	FALSE	"The appearance of interferon-gamma due to biosynthesis or secretion following a cellular stimulus, resulting in an increase in its intracellular or extracellular levels. Interferon-gamma is also known as type II interferon." [GOC:add, GOC:mah, PMID:15546383]	117	1292	16	18123	0.0123839	0.136752	Higher in GroupD	['GO:0001816']
GO:BP	GO:0032608	interferon-beta production	1	FALSE	"The appearance of interferon-beta due to biosynthesis or secretion following a cellular stimulus, resulting in an increase in its intracellular or extracellular levels." [GOC:mah, PMID:15546383]	57	29	1	18123	0.0344828	0.0175439	Higher in GroupD	['GO:0032606']
GO:BP	GO:0032607	interferon-alpha production	1	FALSE	"The appearance of interferon-alpha due to biosynthesis or secretion following a cellular stimulus, resulting in an increase in its intracellular or extracellular levels." [GOC:mah, PMID:15546383]	30	1768	3	18123	0.00169683	0.1	Higher in GroupD	['GO:0032606']
GO:BP	GO:0032606	type I interferon production	1	FALSE	"The appearance of type I interferon due to biosynthesis or secretion following a cellular stimulus, resulting in an increase in its intracellular or extracellular levels. Type I interferons include the interferon-alpha, beta, delta, episilon, zeta, kappa, tau, and omega gene families." [GOC:add, ISBN:0126896631, PMID:15546383, PMID:16681834]	134	585	9	18123	0.0153846	0.0671642	Higher in GroupD	['GO:0001816']
GO:BP	GO:0032616	interleukin-13 production	1	FALSE	"The appearance of interleukin-13 due to biosynthesis or secretion following a cellular stimulus, resulting in an increase in its intracellular or extracellular levels." [GOC:mah]	20	48	1	18123	0.0208333	0.05	Higher in GroupD	['GO:0001816']
GO:BP	GO:0032604	granulocyte macrophage colony-stimulating factor production	1	FALSE	"The appearance of granulocyte macrophage colony-stimulating factor due to biosynthesis or secretion following a cellular stimulus, resulting in an increase in its intracellular or extracellular levels." [GOC:mah, ISBN:0198506732]	16	427	2	18123	0.00468384	0.125	Higher in GroupD	['GO:0001816', 'GO:0019538']
GO:BP	GO:0032602	chemokine production	1	FALSE	"The appearance of a chemokine due to biosynthesis or secretion following a cellular stimulus, resulting in an increase in its intracellular or extracellular levels. All chemokines possess a number of conserved cysteine residues involved in intramolecular disulfide bond formation. Some chemokines are considered pro-inflammatory and can be induced during an immune response to recruit cells of the …	101	5	1	18123	0.2	0.00990099	Higher in GroupD	['GO:0001816']
GO:BP	GO:0032596	protein transport into membrane raft	1	FALSE	"The directed movement of a protein into a membrane raft. Membrane rafts are small (10-200 nm), heterogeneous, highly dynamic, sterol- and sphingolipid-enriched membrane domains that compartmentalize cellular processes." [GOC:mah]	5	21	1	18123	0.047619	0.2	Higher in GroupD	['GO:0032594', 'GO:0090150', 'GO:1903044']
GO:BP	GO:0032594	protein transport within lipid bilayer	1	FALSE	"The directed movement of a protein from one location to another within a lipid bilayer." [GOC:mah]	7	21	1	18123	0.047619	0.142857	Higher in GroupD	['GO:0006886', 'GO:0061024']
GO:BP	GO:0032570	response to progesterone	1	FALSE	"Any process that results in a change in state or activity of a cell or an organism (in terms of movement, secretion, enzyme production, gene expression, etc.) as a result of a progesterone stimulus." [GOC:sl]	43	447	2	18123	0.00447427	0.0465116	Higher in GroupD	['GO:0048545', 'GO:1901654']
GO:BP	GO:0032543	mitochondrial translation	1	FALSE	"The chemical reactions and pathways resulting in the formation of a protein in a mitochondrion. This is a ribosome-mediated process in which the information in messenger RNA (mRNA) is used to specify the sequence of amino acids in the protein; the mitochondrion has its own ribosomes and transfer RNAs, and uses a genetic code that differs from the nuclear code." [GOC:go_curators]	135	2014	28	18123	0.0139027	0.207407	Higher in GroupD	['GO:0006412', 'GO:0140053']
GO:BP	GO:0032536	regulation of cell projection size	1	FALSE	"A process that modulates the size of a cell projection." [GOC:mah]	12	590	1	18123	0.00169492	0.0833333	Higher in GroupD	['GO:0032535']
GO:BP	GO:0032535	regulation of cellular component size	1	FALSE	"A process that modulates the size of a cellular component." [GOC:mah]	388	1073	25	18123	0.0232992	0.064433	Higher in GroupD	['GO:0016043', 'GO:0090066']
GO:BP	GO:0032534	regulation of microvillus assembly	1	FALSE	"A process that modulates the formation of a microvillus." [GOC:mah]	6	564	1	18123	0.00177305	0.166667	Higher in GroupD	['GO:0030033', 'GO:0032530', 'GO:0120032']
GO:BP	GO:0032603	fractalkine production	1	FALSE	"The appearance of fractalkine due to biosynthesis or secretion following a cellular stimulus, resulting in an increase in its intracellular or extracellular levels." [GOC:mah, PMID:12729461]	2	1074	1	18123	0.000931099	0.5	Higher in GroupD	['GO:0032602']
GO:BP	GO:0032660	regulation of interleukin-17 production	1	FALSE	"Any process that modulates the frequency, rate, or extent of production of any member of the interleukin-17 family of cytokines." [GOC:add, GOC:mah, PMID:16482511]	45	387	4	18123	0.0103359	0.0888889	Higher in GroupD	['GO:0001817', 'GO:0032620']
GO:BP	GO:0032620	interleukin-17 production	1	FALSE	"The appearance of any member of the interleukin-17 family of cytokines due to biosynthesis or secretion following a cellular stimulus, resulting in an increase in its intracellular or extracellular levels." [GOC:mah, GOC:rv, Wikipedia:Interleukin_17]	45	387	4	18123	0.0103359	0.0888889	Higher in GroupD	['GO:0001816']
GO:BP	GO:0032623	interleukin-2 production	1	FALSE	"The appearance of interleukin-2 due to biosynthesis or secretion following a cellular stimulus, resulting in an increase in its intracellular or extracellular levels." [GOC:mah]	62	431	4	18123	0.00928074	0.0645161	Higher in GroupD	['GO:0001816']
GO:BP	GO:0032655	regulation of interleukin-12 production	1	FALSE	"Any process that modulates the frequency, rate, or extent of interleukin-12 production." [GOC:mah]	61	317	4	18123	0.0126183	0.0655738	Higher in GroupD	['GO:0001817', 'GO:0032615']
GO:BP	GO:0032653	regulation of interleukin-10 production	1	FALSE	"Any process that modulates the frequency, rate, or extent of interleukin-10 production." [GOC:mah]	61	522	5	18123	0.00957854	0.0819672	Higher in GroupD	['GO:0001817', 'GO:0032613']
GO:BP	GO:0032652	regulation of interleukin-1 production	1	FALSE	"Any process that modulates the frequency, rate, or extent of interleukin-1 production." [GOC:mah]	127	120	2	18123	0.0166667	0.015748	Higher in GroupD	['GO:0001817', 'GO:0032612']
GO:BP	GO:0032651	regulation of interleukin-1 beta production	1	FALSE	"Any process that modulates the frequency, rate, or extent of interleukin-1 beta production." [GOC:mah]	109	120	2	18123	0.0166667	0.0183486	Higher in GroupD	['GO:0032611', 'GO:0032652']
GO:BP	GO:0032649	regulation of interferon-gamma production	1	FALSE	"Any process that modulates the frequency, rate, or extent of interferon-gamma production. Interferon-gamma is also known as type II interferon." [GOC:add, GOC:mah, PMID:15546383]	116	1292	16	18123	0.0123839	0.137931	Higher in GroupD	['GO:0001817', 'GO:0032609']
GO:BP	GO:0032648	regulation of interferon-beta production	1	FALSE	"Any process that modulates the frequency, rate, or extent of interferon-beta production." [GOC:mah, PMID:15546383]	57	29	1	18123	0.0344828	0.0175439	Higher in GroupD	['GO:0032479', 'GO:0032608']
GO:BP	GO:0032647	regulation of interferon-alpha production	1	FALSE	"Any process that modulates the frequency, rate, or extent of interferon-alpha production." [GOC:mah, PMID:15546383]	30	1768	3	18123	0.00169683	0.1	Higher in GroupD	['GO:0032479', 'GO:0032607']
GO:BP	GO:0032645	regulation of granulocyte macrophage colony-stimulating factor production	1	FALSE	"Any process that modulates the frequency, rate, or extent of granulocyte macrophage colony-stimulating factor production." [GOC:mah]	16	427	2	18123	0.00468384	0.125	Higher in GroupD	['GO:0001817', 'GO:0032604', 'GO:0051246']
GO:BP	GO:0032621	interleukin-18 production	1	FALSE	"The appearance of interleukin-18 due to biosynthesis or secretion following a cellular stimulus, resulting in an increase in its intracellular or extracellular levels." [GOC:mah]	12	1102	1	18123	0.000907441	0.0833333	Higher in GroupD	['GO:0001816']
GO:BP	GO:0032644	regulation of fractalkine production	1	FALSE	"Any process that modulates the frequency, rate, or extent of fractalkine production." [GOC:mah]	2	1074	1	18123	0.000931099	0.5	Higher in GroupD	['GO:0032603', 'GO:0032642']
GO:BP	GO:0032640	tumor necrosis factor production	1	FALSE	"The appearance of tumor necrosis factor due to biosynthesis or secretion following a cellular stimulus, resulting in an increase in its intracellular or extracellular levels. Tumor necrosis factor is an inflammatory cytokine produced by macrophages/monocytes during acute inflammation and which is responsible for a diverse range of signaling events within cells, leading to necrosis or apoptosis."…	180	343	7	18123	0.0204082	0.0388889	Higher in GroupD	['GO:0071706']
GO:BP	GO:0032639	TRAIL production	1	FALSE	"The appearance of TRAIL due to biosynthesis or secretion following a cellular stimulus, resulting in an increase in its intracellular or extracellular levels." [GOC:mah, PMID:9311998]	2	2217	1	18123	0.00045106	0.5	Higher in GroupD	['GO:0071706']
GO:BP	GO:0032637	interleukin-8 production	1	FALSE	"The appearance of interleukin-8 due to biosynthesis or secretion following a cellular stimulus, resulting in an increase in its intracellular or extracellular levels." [GOC:mah]	104	5	1	18123	0.2	0.00961538	Higher in GroupD	['GO:0001816']
GO:BP	GO:0032635	interleukin-6 production	1	FALSE	"The appearance of interleukin-6 due to biosynthesis or secretion following a cellular stimulus, resulting in an increase in its intracellular or extracellular levels." [GOC:mah]	172	5	1	18123	0.2	0.00581395	Higher in GroupD	['GO:0001816']
GO:BP	GO:0032634	interleukin-5 production	1	FALSE	"The appearance of interleukin-5 due to biosynthesis or secretion following a cellular stimulus, resulting in an increase in its intracellular or extracellular levels." [GOC:mah]	19	48	1	18123	0.0208333	0.0526316	Higher in GroupD	['GO:0001816']
GO:BP	GO:0032633	interleukin-4 production	1	FALSE	"The appearance of interleukin-4 due to biosynthesis or secretion following a cellular stimulus, resulting in an increase in its intracellular or extracellular levels." [GOC:mah]	33	1211	5	18123	0.00412882	0.151515	Higher in GroupD	['GO:0001816']
GO:BP	GO:0032632	interleukin-3 production	1	FALSE	"The appearance of interleukin-3 due to biosynthesis or secretion following a cellular stimulus, resulting in an increase in its intracellular or extracellular levels." [GOC:mah]	2	1211	1	18123	0.000825764	0.5	Higher in GroupD	['GO:0001816']
GO:BP	GO:0032627	interleukin-23 production	1	FALSE	"The appearance of interleukin-23 due to biosynthesis or secretion following a cellular stimulus, resulting in an increase in its intracellular or extracellular levels." [GOC:mah]	9	1861	1	18123	0.000537346	0.111111	Higher in GroupD	['GO:0001816']
GO:BP	GO:0032642	regulation of chemokine production	1	FALSE	"Any process that modulates the frequency, rate, or extent of chemokine production." [GOC:mah]	100	5	1	18123	0.2	0.01	Higher in GroupD	['GO:0001817', 'GO:0032602']
GO:BP	GO:0032759	positive regulation of TRAIL production	1	FALSE	"Any process that activates or increases the frequency, rate, or extent of TRAIL production." [GOC:mah]	2	2217	1	18123	0.00045106	0.5	Higher in GroupD	['GO:0032639', 'GO:0032679', 'GO:1903557']
GO:BP	GO:0032760	positive regulation of tumor necrosis factor production	1	FALSE	"Any process that activates or increases the frequency, rate or extent of tumor necrosis factor production." [GO_REF:0000058, GOC:TermGenie, PMID:10891884, PMID:15560120]	101	343	6	18123	0.0174927	0.0594059	Higher in GroupD	['GO:0032640', 'GO:0032680', 'GO:1903557']
GO:BP	GO:0032768	regulation of monooxygenase activity	1	FALSE	"Any process that modulates the activity of a monooxygenase." [GOC:mah]	68	175	2	18123	0.0114286	0.0294118	Higher in GroupD	['GO:0051341']
GO:BP	GO:0032957	inositol trisphosphate metabolic process	1	FALSE	"The chemical reactions and pathways involving myo-inositol phosphate, 1,2,3,4,5,6-cyclohexanehexol, with three phosphate groups attached." [GOC:mah]	12	2377	3	18123	0.0012621	0.25	Higher in GroupD	['GO:0043647']
GO:BP	GO:0032956	regulation of actin cytoskeleton organization	1	FALSE	"Any process that modulates the frequency, rate or extent of the formation, arrangement of constituent parts, or disassembly of cytoskeletal structures comprising actin filaments and their associated proteins." [GOC:mah]	365	7	1	18123	0.142857	0.00273973	Higher in GroupD	['GO:0030036', 'GO:0032970', 'GO:0051493']
GO:BP	GO:0032946	positive regulation of mononuclear cell proliferation	1	FALSE	"Any process that activates or increases the frequency, rate or extent of mononuclear cell proliferation." [GOC:add]	142	721	14	18123	0.0194175	0.0985915	Higher in GroupD	['GO:0032943', 'GO:0032944', 'GO:0070665']
GO:BP	GO:0032945	negative regulation of mononuclear cell proliferation	1	FALSE	"Any process that stops, prevents, or reduces the frequency, rate or extent of mononuclear cell proliferation." [GOC:add]	88	7	1	18123	0.142857	0.0113636	Higher in GroupD	['GO:0032943', 'GO:0032944', 'GO:0070664']
GO:BP	GO:0032944	regulation of mononuclear cell proliferation	1	FALSE	"Any process that modulates the frequency, rate or extent of mononuclear cell proliferation." [GOC:add]	234	941	23	18123	0.0244421	0.0982906	Higher in GroupD	['GO:0032943', 'GO:0070663']
GO:BP	GO:0032943	mononuclear cell proliferation	1	FALSE	"The expansion of a mononuclear cell population by cell division. A mononuclear cell is a leukocyte with a single non-segmented nucleus in the mature form." [GOC:add]	299	721	22	18123	0.0305132	0.0735786	Higher in GroupD	['GO:0070661']
GO:BP	GO:0032941	secretion by tissue	1	FALSE	"The controlled release of a substance by a tissue." [GOC:mah]	38	1463	4	18123	0.00273411	0.105263	Higher in GroupD	['GO:0032501', 'GO:0046903']
GO:BP	GO:0032940	secretion by cell	1	FALSE	"The controlled release of a substance by a cell." [GOC:mah]	1351	113	12	18123	0.106195	0.00888231	Higher in GroupD	['GO:0046903', 'GO:0140352']
GO:BP	GO:0032958	inositol phosphate biosynthetic process	1	FALSE	"The chemical reactions and pathways resulting in the formation of an inositol phosphate, 1,2,3,4,5,6-cyclohexanehexol, with one or more phosphate groups attached." [GOC:mah]	29	2658	5	18123	0.00188111	0.172414	Higher in GroupD	['GO:0043647', 'GO:0046173', 'GO:0090407']
GO:BP	GO:0032933	SREBP signaling pathway	1	FALSE	"A series of molecular signals from the endoplasmic reticulum to the nucleus generated as a consequence of decreased levels of one or more sterols (and in some yeast, changes in oxygen levels) and which proceeds through activation of a sterol response element binding transcription factor (SREBP) to result in up-regulation of target gene transcription." [GOC:bf, GOC:mah, GOC:signaling, GOC:vw, PMI…	15	1431	3	18123	0.00209644	0.2	Higher in GroupD	['GO:0006984', 'GO:0071501']
GO:BP	GO:0032928	regulation of superoxide anion generation	1	FALSE	"Any process that modulates the frequency, rate or extent of enzymatic generation of superoxide by a cell." [GOC:mah]	23	522	1	18123	0.00191571	0.0434783	Higher in GroupD	['GO:0042554', 'GO:0090322']
GO:BP	GO:0032927	positive regulation of activin receptor signaling pathway	1	FALSE	"Any process that activates or increases the frequency, rate or extent of the activity of any activin receptor signaling pathway." [GOC:BHF, GOC:rl]	7	2032	2	18123	0.000984252	0.285714	Higher in GroupD	['GO:0032924', 'GO:0032925', 'GO:0090100']
GO:BP	GO:0032926	negative regulation of activin receptor signaling pathway	1	FALSE	"Any process that stops, prevents, or reduces the frequency, rate or extent of the activity of any activin receptor signaling pathway." [GOC:BHF, GOC:rl]	11	1345	1	18123	0.000743494	0.0909091	Higher in GroupD	['GO:0032924', 'GO:0032925', 'GO:0090101']
GO:BP	GO:0032925	regulation of activin receptor signaling pathway	1	FALSE	"Any process that modulates the frequency, rate or extent of the activity of any activin receptor signaling pathway." [GOC:BHF, GOC:rl]	24	60	1	18123	0.0166667	0.0416667	Higher in GroupD	['GO:0032924', 'GO:0090092']
GO:BP	GO:0032924	activin receptor signaling pathway	1	FALSE	"A series of molecular signals initiated by the binding of an extracellular ligand to an activin receptor on the surface of a target cell, and ending with regulation of a downstream cellular process, e.g. transcription." [GOC:rl, GOC:signaling]	44	206	2	18123	0.00970874	0.0454545	Higher in GroupD	['GO:0007178']
GO:BP	GO:0032922	circadian regulation of gene expression	1	FALSE	"Any process that modulates the frequency, rate or extent of gene expression such that an expression pattern recurs with a regularity of approximately 24 hours." [GOC:mah]	67	2355	11	18123	0.00467091	0.164179	Higher in GroupD	['GO:0007623', 'GO:0010468', 'GO:0032501']
GO:BP	GO:0032914	positive regulation of transforming growth factor beta1 production	1	FALSE	"Any process that activates or increases the frequency, rate, or extent of production of transforming growth factor-beta1." [GOC:mah]	7	1266	1	18123	0.000789889	0.142857	Higher in GroupD	['GO:0032905', 'GO:0032908', 'GO:0071636']
GO:BP	GO:0032912	negative regulation of transforming growth factor beta2 production	1	FALSE	"Any process that stops, prevents, or reduces the frequency, rate, or extent of production of transforming growth factor-beta2." [GOC:mah]	2	617	1	18123	0.00162075	0.5	Higher in GroupD	['GO:0032906', 'GO:0032909', 'GO:0071635']
GO:BP	GO:0032930	positive regulation of superoxide anion generation	1	FALSE	"Any process that activates or increases the frequency, rate or extent of enzymatic generation of superoxide by a cell." [GOC:mah]	19	522	1	18123	0.00191571	0.0526316	Higher in GroupD	['GO:0032928', 'GO:0042554', 'GO:2000379']
GO:BP	GO:0032911	negative regulation of transforming growth factor beta1 production	1	FALSE	"Any process that stops, prevents, or reduces the frequency, rate, or extent of production of transforming growth factor-beta1." [GOC:mah]	6	617	2	18123	0.00324149	0.333333	Higher in GroupD	['GO:0032905', 'GO:0032908', 'GO:0071635']
GO:BP	GO:0032959	inositol trisphosphate biosynthetic process	1	FALSE	"The chemical reactions and pathways resulting in the formation of inositol trisphosphate, 1,2,3,4,5,6-cyclohexanehexol, with three phosphate groups attached." [GOC:mah]	9	2377	3	18123	0.0012621	0.333333	Higher in GroupD	['GO:0032957', 'GO:0032958']
GO:BP	GO:0032962	positive regulation of inositol trisphosphate biosynthetic process	1	FALSE	"Any process that activates or increases the frequency, rate or extent of the chemical reactions and pathways resulting in the formation of inositol trisphosphate." [GOC:mah]	5	2377	1	18123	0.000420698	0.2	Higher in GroupD	['GO:0032959', 'GO:0032960', 'GO:0060732']
GO:BP	GO:0033005	positive regulation of mast cell activation	1	FALSE	"Any process that activates or increases the frequency, rate, or extent of mast cell activation." [GOC:mah]	20	2140	4	18123	0.00186916	0.2	Higher in GroupD	['GO:0002696', 'GO:0033003', 'GO:0045576']
GO:BP	GO:0033003	regulation of mast cell activation	1	FALSE	"Any process that modulates the frequency, rate, or extent of mast cell activation." [GOC:mah]	42	2596	9	18123	0.00346687	0.214286	Higher in GroupD	['GO:0002694', 'GO:0045576']
GO:BP	GO:0033002	muscle cell proliferation	1	FALSE	"The expansion of a muscle cell population by cell division." [CL:0000187, GOC:mah]	250	562	15	18123	0.0266904	0.06	Higher in GroupD	['GO:0008283']
GO:BP	GO:0032990	cell part morphogenesis	1	FALSE	"The process in which the anatomical structures of a cell part are generated and organized." [GOC:mah]	705	330	17	18123	0.0515152	0.0241135	Higher in GroupD	['GO:0032989']
GO:BP	GO:0032989	cellular component morphogenesis	1	FALSE	"The process in which cellular structures, including whole cells or cell parts, are generated and organized." [GOC:dph, GOC:mah, GOC:tb]	797	330	18	18123	0.0545455	0.0225847	Higher in GroupD	['GO:0009653', 'GO:0016043', 'GO:0048869']
GO:BP	GO:0032988	ribonucleoprotein complex disassembly	1	FALSE	"The disaggregation of a protein-RNA complex into its constituent components." [GOC:mah]	7	711	1	18123	0.00140647	0.142857	Higher in GroupD	['GO:0032984', 'GO:0071826']
GO:BP	GO:0032986	protein-DNA complex disassembly	1	FALSE	"The disaggregation of a protein-DNA complex into its constituent components." [GOC:mah]	20	2544	3	18123	0.00117925	0.15	Higher in GroupD	['GO:0032984', 'GO:0071824']
GO:BP	GO:0032984	protein-containing complex disassembly	1	FALSE	"The disaggregation of a protein-containing macromolecular complex into its constituent components." [GOC:mah]	337	1563	36	18123	0.0230326	0.106825	Higher in GroupD	['GO:0022411', 'GO:0043933']
GO:BP	GO:0032960	regulation of inositol trisphosphate biosynthetic process	1	FALSE	"Any process that modulates the frequency, rate or extent of the chemical reactions and pathways resulting in the formation of inositol trisphosphate." [GOC:mah]	6	2377	2	18123	0.000841397	0.333333	Higher in GroupD	['GO:0010919', 'GO:0032959']
GO:BP	GO:0032981	mitochondrial respiratory chain complex I assembly	1	FALSE	"The aggregation, arrangement and bonding together of a set of components to form mitochondrial respiratory chain complex I." [GOC:rph]	67	718	2	18123	0.00278552	0.0298507	Higher in GroupD	['GO:0010257', 'GO:0033108']
GO:BP	GO:0032978	protein insertion into membrane from inner side	1	FALSE	"The process in which a protein is incorporated into a lipid bilayer, e.g., the prokaryotic, mitochondrial, or chloroplast inner membrane, from the inner side." [PMID:14739936, PMID:15473843]	4	369	1	18123	0.00271003	0.25	Higher in GroupD	['GO:0051205']
GO:BP	GO:0032970	regulation of actin filament-based process	1	FALSE	"Any process that modulates the frequency, rate or extent of any cellular process that depends upon or alters the actin cytoskeleton." [GOC:mah]	404	7	1	18123	0.142857	0.00247525	Higher in GroupD	['GO:0030029', 'GO:0050794']
GO:BP	GO:0032968	positive regulation of transcription elongation from RNA polymerase II promoter	1	FALSE	"Any process that activates or increases the frequency, rate or extent of transcription elongation, the extension of an RNA molecule after transcription initiation and promoter clearance by the addition of ribonucleotides, catalyzed by RNA polymerase II." [GOC:mah, GOC:txnOH]	13	392	1	18123	0.00255102	0.0769231	Higher in GroupD	['GO:0006368', 'GO:0032786', 'GO:0034243', 'GO:0045944']
GO:BP	GO:0032967	positive regulation of collagen biosynthetic process	1	FALSE	"Any process that activates or increases the frequency, rate or extent of the chemical reactions and pathways resulting in the formation of collagen, any of a group of fibrous proteins of very high tensile strength that form the main component of connective tissue in animals." [GOC:mah]	27	545	1	18123	0.00183486	0.037037	Higher in GroupD	['GO:0009891', 'GO:0010714', 'GO:0032964', 'GO:0032965']
GO:BP	GO:0032966	negative regulation of collagen biosynthetic process	1	FALSE	"Any process that stops, prevents, or reduces the frequency, rate or extent of the chemical reactions and pathways resulting in the formation of collagen, any of a group of fibrous proteins of very high tensile strength that form the main component of connective tissue in animals." [GOC:mah]	19	5	1	18123	0.2	0.0526316	Higher in GroupD	['GO:0009890', 'GO:0010713', 'GO:0032964', 'GO:0032965']
GO:BP	GO:0032965	regulation of collagen biosynthetic process	1	FALSE	"Any process that modulates the frequency, rate or extent of the chemical reactions and pathways resulting in the formation of collagen, any of a group of fibrous proteins of very high tensile strength that form the main component of connective tissue in animals." [GOC:mah]	47	5	1	18123	0.2	0.0212766	Higher in GroupD	['GO:0009889', 'GO:0010712', 'GO:0032964']
GO:BP	GO:0032964	collagen biosynthetic process	1	FALSE	"The chemical reactions and pathways resulting in the formation of collagen, any of a group of fibrous proteins of very high tensile strength that form the main component of connective tissue in animals. Collagen is highly enriched in glycine (some regions are 33% glycine) and proline, occurring predominantly as 3-hydroxyproline (about 20%)." [GOC:mah, ISBN:0198506732]	56	5	1	18123	0.2	0.0178571	Higher in GroupD	['GO:0009058', 'GO:0032963']
GO:BP	GO:0032963	collagen metabolic process	1	FALSE	"The chemical reactions and pathways involving collagen, any of a group of fibrous proteins of very high tensile strength that form the main component of connective tissue in animals. Collagen is highly enriched in glycine (some regions are 33% glycine) and proline, occurring predominantly as 3-hydroxyproline (about 20%)." [GOC:mah, ISBN:0198506732]	114	24	2	18123	0.0833333	0.0175439	Higher in GroupD	['GO:0008152']
GO:BP	GO:0032979	protein insertion into mitochondrial inner membrane from matrix	1	FALSE	"The process in which a protein is incorporated into the mitochondrial inner membrane from the matrix side. This includes membrane insertion of newly synthesized mitochondrially-encoded proteins, and insertion of nuclear-encoded proteins after their import into the mitochondrial matrix." [GOC:vw, PMID:12880202, PMID:15473843]	4	369	1	18123	0.00271003	0.25	Higher in GroupD	['GO:0006839', 'GO:0006886', 'GO:0032978', 'GO:0090151']
GO:BP	GO:0032909	regulation of transforming growth factor beta2 production	1	FALSE	"Any process that modulates the frequency, rate, or extent of production of transforming growth factor-beta2." [GOC:mah]	9	617	1	18123	0.00162075	0.111111	Higher in GroupD	['GO:0032906', 'GO:0071634']
GO:BP	GO:0032908	regulation of transforming growth factor beta1 production	1	FALSE	"Any process that modulates the frequency, rate, or extent of production of transforming growth factor-beta1." [GOC:mah]	12	1266	3	18123	0.00236967	0.25	Higher in GroupD	['GO:0032905', 'GO:0071634']
GO:BP	GO:0032906	transforming growth factor beta2 production	1	FALSE	"The appearance of transforming growth factor-beta2 due to biosynthesis or secretion following a cellular stimulus, resulting in an increase in its intracellular or extracellular levels." [GOC:mah]	9	617	1	18123	0.00162075	0.111111	Higher in GroupD	['GO:0071604']
GO:BP	GO:0032817	regulation of natural killer cell proliferation	1	FALSE	"Any process that modulates the frequency, rate or extent of natural killer cell proliferation." [GOC:mah]	9	317	1	18123	0.00315457	0.111111	Higher in GroupD	['GO:0001787', 'GO:0032814', 'GO:0050670']
GO:BP	GO:0032816	positive regulation of natural killer cell activation	1	FALSE	"Any process that activates or increases the frequency, rate or extent of natural killer cell activation." [GOC:mah]	23	2195	6	18123	0.00273349	0.26087	Higher in GroupD	['GO:0030101', 'GO:0032814', 'GO:0051251']
GO:BP	GO:0032815	negative regulation of natural killer cell activation	1	FALSE	"Any process that stops, prevents, or reduces the frequency, rate or extent of natural killer cell activation." [GOC:mah]	9	1211	1	18123	0.000825764	0.111111	Higher in GroupD	['GO:0030101', 'GO:0032814', 'GO:0051250']
GO:BP	GO:0032814	regulation of natural killer cell activation	1	FALSE	"Any process that modulates the frequency, rate or extent of natural killer cell activation." [GOC:mah]	36	1300	6	18123	0.00461538	0.166667	Higher in GroupD	['GO:0030101', 'GO:0051249']
GO:BP	GO:0032801	receptor catabolic process	1	FALSE	"The chemical reactions and pathways resulting in the breakdown of a receptor molecule, a macromolecule that undergoes combination with a hormone, neurotransmitter, drug or intracellular messenger to initiate a change in cell function." [GOC:mah]	35	301	2	18123	0.00664452	0.0571429	Higher in GroupD	['GO:0009057', 'GO:0043112', 'GO:0044248']
GO:BP	GO:0032793	positive regulation of CREB transcription factor activity	1	FALSE	"Any process that activates or increases the frequency, rate or extent of activity of the transcription factor CREB." [GOC:dph, GOC:ecd, GOC:tb]	19	645	2	18123	0.00310078	0.105263	Higher in GroupD	['GO:0051091']
GO:BP	GO:0032792	negative regulation of CREB transcription factor activity	1	FALSE	"Any process that stops, prevents, or reduces the frequency, rate or extent of the activity of the transcription factor CREB." [GOC:dph, GOC:ecd, GOC:tb]	5	150	1	18123	0.00666667	0.2	Higher in GroupD	['GO:0043433']
GO:BP	GO:0032790	ribosome disassembly	1	FALSE	"The disaggregation of a ribosome into its constituent components; includes the dissociation of ribosomal subunits." [GOC:mah, GOC:vk]	8	489	1	18123	0.00204499	0.125	Higher in GroupD	['GO:1903008']
GO:BP	GO:0032819	positive regulation of natural killer cell proliferation	1	FALSE	"Any process that activates or increases the frequency, rate or extent of natural killer cell proliferation." [GOC:mah]	7	317	1	18123	0.00315457	0.142857	Higher in GroupD	['GO:0001787', 'GO:0032816', 'GO:0032817', 'GO:0050671']
GO:BP	GO:0032787	monocarboxylic acid metabolic process	1	FALSE	"The chemical reactions and pathways involving monocarboxylic acids, any organic acid containing one carboxyl (COOH) group or anion (COO-)." [GOC:vk]	663	307	16	18123	0.0521173	0.0241327	Higher in GroupD	['GO:0019752']
GO:BP	GO:0032785	negative regulation of DNA-templated transcription, elongation	1	FALSE	"Any process that stops, prevents, or reduces the frequency, rate or extent of transcription elongation, the extension of an RNA molecule after transcription initiation and promoter clearance by the addition of ribonucleotides catalyzed by a DNA-dependent RNA polymerase." [GOC:mah, GOC:txnOH]	16	1836	3	18123	0.00163399	0.1875	Higher in GroupD	['GO:0006354', 'GO:0032784', 'GO:0045892']
GO:BP	GO:0032784	regulation of DNA-templated transcription, elongation	1	FALSE	"Any process that modulates the frequency, rate or extent of transcription elongation, the extension of an RNA molecule after transcription initiation and promoter clearance by the addition of ribonucleotides catalyzed by a DNA-dependent RNA polymerase." [GOC:mah, GOC:txnOH]	50	34	1	18123	0.0294118	0.02	Higher in GroupD	['GO:0006354', 'GO:0006355']
GO:BP	GO:0032782	bile acid secretion	1	FALSE	"The regulated release of bile acid, composed of any of a group of steroid carboxylic acids occurring in bile, by a cell or a tissue." [GOC:ecd]	12	986	1	18123	0.0010142	0.0833333	Higher in GroupD	['GO:0015718', 'GO:0046717']
GO:BP	GO:0032781	positive regulation of ATPase activity	1	FALSE	"Any process that activates or increases the rate of ATP hydrolysis by an ATPase." [GOC:mah]	60	21	1	18123	0.047619	0.0166667	Higher in GroupD	['GO:0043462', 'GO:0044093']
GO:BP	GO:0032780	negative regulation of ATPase activity	1	FALSE	"Any process that stops or reduces the rate of ATP hydrolysis by an ATPase." [GOC:mah]	23	45	1	18123	0.0222222	0.0434783	Higher in GroupD	['GO:0043462', 'GO:0044092']
[truncated: 21,947 more rows]

## Sheet: DNA DamageTelomere Stress Induc
Gene ID	Gene Name	baseMean	log2FoldChange	lfcSE	stat	pvalue	padj	MCV LT	MCV LT + p21KD	lfcShrink
ENSG00000141510	TP53	3850.69	2.8895	0.0828515	27.8148	2.87117e-170	3.41259e-167	5365.13	805.988	2.88166	Red = significant
[truncated: 58 more rows]

## Sheet: Senescence-Associated Secretory
Gene ID	Gene Name	baseMean	log2FoldChange	lfcSE	stat	pvalue	padj	MCV LT	MCV LT + p21KD	lfcShrink
[truncated: 73 more rows]

## Sheet: Cellular Senescence
Gene ID	Gene Name	baseMean	log2FoldChange	lfcSE	stat	pvalue	padj	MCV LT	MCV LT + p21KD	lfcShrink
[truncated: 110 more rows]
